# Supplementary material
Source: Research Square preprint supplement (doi:10.21203/rs.3.rs-9051103/v1)
Supplement: Supplementary file 1 [file 2d31761624ea390d44a80814.xlsx]

## Sheet: Sheet1
Station	MSC fraction	Average bulk N2 fixation (nmol N l-1 d-1)	Standard deviation
N00	susp	0.301	0.162969
N00	ss	0.121821	NA
N00	fs	0.176533	0.201542
N01	susp	0.248	0.31939
N01	fs	0.0879259	0.0561545
N04	susp	0.506	0.076319
N04	ss	0.194991	0.0945555
N04	fs	0.0990126	0.111116
N12	susp	0.348	0.259877
N12	ss	0.0983332	0.0666845
N12	fs	0.0623952	0.0464722
N10	susp	1.615	0.516022
N10	ss	0.217479	0.0952117
N10	fs	0.185105	NA
N08	susp	0.539	0.675708
N08	ss	0.113929	0.143125
N08	fs	0.459143	NA
N07	susp	0.583	0.561425
N07	ss	0.0492182	0.0413646
N06	susp	1.244	0.71828
N06	ss	0.193587	0.0917692
N13	susp	0.894	0.65862
N13	ss	0.091896	0.0700795
N13	fs	0.0507647	NA
N16	susp	0.174	0.0687969
N03	susp	0.09	0.106443
N03	ss	0.0301715	0.014711
