# Supplementary material
Source: Research Square preprint supplement (doi:10.21203/rs.3.rs-9051103/v1)
Supplement: Supplementary file 3 [file 506f0da1b02f4e96279374bb.xlsx]

## Sheet: Sheet1
Filter	Station	Fraction	Depth	Matched_Depth	Depth_Diff	Within_Tolerance	date_time	Cast	Event	Lat	Lon	RosetteBottle	SampleID	Pres	Temp	Sal	Oxy_umoll	Oxy_umolkg	Chla	PAR	Att	Trans	Turb	NN	Si	PO4	NO2	Chla_Ext	meanPC	stdevPC	meanPN	stdevPN	dCd	dPb	dTi	dMn	dFe	dCo	dNi	dCu	pCd	pBa	pPb	pAl	pTi	pMn	pFe	pCo	pNi
particle-associated	N00	susp	30	26.4402	3.55981	TRUE	14/07/2023 12:04	1S	2	68.8066	10.4366	14	14	26.7104	9.95415	35.0714	310.192	302.048	1.81255	2.37152	0.215861	91.3058	0.00031	7.052	1.7616	0.469	0.178741	1.792	7.18501	2.30227	0.994601	0.189296	126.602	18.3561	149.377	12.106	0.746995	242.026	3.69501	2.23558	0.00156233	0.0560212	0.0272469	1463.03	2.05025	21.5072	479.777	0.0842012	0.161174
particle-associated	N00	susp	30	26.4402	3.55981	TRUE	14/07/2023 12:04	1S	2	68.8066	10.4366	14	14	26.7104	9.95415	35.0714	310.192	302.048	1.81255	2.37152	0.215861	91.3058	0.00031	7.052	1.7616	0.469	0.178741	1.792	7.18501	2.30227	0.994601	0.189296	126.602	18.3561	149.377	12.106	0.746995	242.026	3.69501	2.23558	0.00156233	0.0560212	0.0272469	1463.03	2.05025	21.5072	479.777	0.0842012	0.161174
particle-associated	N00	susp	30	26.4402	3.55981	TRUE	14/07/2023 12:04	1S	2	68.8066	10.4366	14	14	26.7104	9.95415	35.0714	310.192	302.048	1.81255	2.37152	0.215861	91.3058	0.00031	7.052	1.7616	0.469	0.178741	1.792	7.18501	2.30227	0.994601	0.189296	126.602	18.3561	149.377	12.106	0.746995	242.026	3.69501	2.23558	0.00156233	0.0560212	0.0272469	1463.03	2.05025	21.5072	479.777	0.0842012	0.161174
free-living	N00	susp	30	26.4402	3.55981	TRUE	14/07/2023 12:04	1S	2	68.8066	10.4366	14	14	26.7104	9.95415	35.0714	310.192	302.048	1.81255	2.37152	0.215861	91.3058	0.00031	7.052	1.7616	0.469	0.178741	1.792	7.18501	2.30227	0.994601	0.189296	126.602	18.3561	149.377	12.106	0.746995	242.026	3.69501	2.23558	0.00156233	0.0560212	0.0272469	1463.03	2.05025	21.5072	479.777	0.0842012	0.161174
free-living	N00	susp	30	26.4402	3.55981	TRUE	14/07/2023 12:04	1S	2	68.8066	10.4366	14	14	26.7104	9.95415	35.0714	310.192	302.048	1.81255	2.37152	0.215861	91.3058	0.00031	7.052	1.7616	0.469	0.178741	1.792	7.18501	2.30227	0.994601	0.189296	126.602	18.3561	149.377	12.106	0.746995	242.026	3.69501	2.23558	0.00156233	0.0560212	0.0272469	1463.03	2.05025	21.5072	479.777	0.0842012	0.161174
free-living	N00	susp	30	26.4402	3.55981	TRUE	14/07/2023 12:04	1S	2	68.8066	10.4366	14	14	26.7104	9.95415	35.0714	310.192	302.048	1.81255	2.37152	0.215861	91.3058	0.00031	7.052	1.7616	0.469	0.178741	1.792	7.18501	2.30227	0.994601	0.189296	126.602	18.3561	149.377	12.106	0.746995	242.026	3.69501	2.23558	0.00156233	0.0560212	0.0272469	1463.03	2.05025	21.5072	479.777	0.0842012	0.161174
particle-associated	N00	ss	30	26.4402	3.55981	TRUE	14/07/2023 12:04	1S	2	68.8066	10.4366	14	14	26.7104	9.95415	35.0714	310.192	302.048	1.81255	2.37152	0.215861	91.3058	0.00031	7.052	1.7616	0.469	0.178741	1.792	7.18501	2.30227	0.994601	0.189296	126.602	18.3561	149.377	12.106	0.746995	242.026	3.69501	2.23558	0.00156233	0.0560212	0.0272469	1463.03	2.05025	21.5072	479.777	0.0842012	0.161174
particle-associated	N00	ss	30	26.4402	3.55981	TRUE	14/07/2023 12:04	1S	2	68.8066	10.4366	14	14	26.7104	9.95415	35.0714	310.192	302.048	1.81255	2.37152	0.215861	91.3058	0.00031	7.052	1.7616	0.469	0.178741	1.792	7.18501	2.30227	0.994601	0.189296	126.602	18.3561	149.377	12.106	0.746995	242.026	3.69501	2.23558	0.00156233	0.0560212	0.0272469	1463.03	2.05025	21.5072	479.777	0.0842012	0.161174
particle-associated	N00	ss	30	26.4402	3.55981	TRUE	14/07/2023 12:04	1S	2	68.8066	10.4366	14	14	26.7104	9.95415	35.0714	310.192	302.048	1.81255	2.37152	0.215861	91.3058	0.00031	7.052	1.7616	0.469	0.178741	1.792	7.18501	2.30227	0.994601	0.189296	126.602	18.3561	149.377	12.106	0.746995	242.026	3.69501	2.23558	0.00156233	0.0560212	0.0272469	1463.03	2.05025	21.5072	479.777	0.0842012	0.161174
free-living	N00	ss	30	26.4402	3.55981	TRUE	14/07/2023 12:04	1S	2	68.8066	10.4366	14	14	26.7104	9.95415	35.0714	310.192	302.048	1.81255	2.37152	0.215861	91.3058	0.00031	7.052	1.7616	0.469	0.178741	1.792	7.18501	2.30227	0.994601	0.189296	126.602	18.3561	149.377	12.106	0.746995	242.026	3.69501	2.23558	0.00156233	0.0560212	0.0272469	1463.03	2.05025	21.5072	479.777	0.0842012	0.161174
free-living	N00	ss	30	26.4402	3.55981	TRUE	14/07/2023 12:04	1S	2	68.8066	10.4366	14	14	26.7104	9.95415	35.0714	310.192	302.048	1.81255	2.37152	0.215861	91.3058	0.00031	7.052	1.7616	0.469	0.178741	1.792	7.18501	2.30227	0.994601	0.189296	126.602	18.3561	149.377	12.106	0.746995	242.026	3.69501	2.23558	0.00156233	0.0560212	0.0272469	1463.03	2.05025	21.5072	479.777	0.0842012	0.161174
free-living	N00	ss	30	26.4402	3.55981	TRUE	14/07/2023 12:04	1S	2	68.8066	10.4366	14	14	26.7104	9.95415	35.0714	310.192	302.048	1.81255	2.37152	0.215861	91.3058	0.00031	7.052	1.7616	0.469	0.178741	1.792	7.18501	2.30227	0.994601	0.189296	126.602	18.3561	149.377	12.106	0.746995	242.026	3.69501	2.23558	0.00156233	0.0560212	0.0272469	1463.03	2.05025	21.5072	479.777	0.0842012	0.161174
particle-associated	N00	fs	30	26.4402	3.55981	TRUE	14/07/2023 12:04	1S	2	68.8066	10.4366	14	14	26.7104	9.95415	35.0714	310.192	302.048	1.81255	2.37152	0.215861	91.3058	0.00031	7.052	1.7616	0.469	0.178741	1.792	7.18501	2.30227	0.994601	0.189296	126.602	18.3561	149.377	12.106	0.746995	242.026	3.69501	2.23558	0.00156233	0.0560212	0.0272469	1463.03	2.05025	21.5072	479.777	0.0842012	0.161174
particle-associated	N00	fs	30	26.4402	3.55981	TRUE	14/07/2023 12:04	1S	2	68.8066	10.4366	14	14	26.7104	9.95415	35.0714	310.192	302.048	1.81255	2.37152	0.215861	91.3058	0.00031	7.052	1.7616	0.469	0.178741	1.792	7.18501	2.30227	0.994601	0.189296	126.602	18.3561	149.377	12.106	0.746995	242.026	3.69501	2.23558	0.00156233	0.0560212	0.0272469	1463.03	2.05025	21.5072	479.777	0.0842012	0.161174
particle-associated	N00	fs	30	26.4402	3.55981	TRUE	14/07/2023 12:04	1S	2	68.8066	10.4366	14	14	26.7104	9.95415	35.0714	310.192	302.048	1.81255	2.37152	0.215861	91.3058	0.00031	7.052	1.7616	0.469	0.178741	1.792	7.18501	2.30227	0.994601	0.189296	126.602	18.3561	149.377	12.106	0.746995	242.026	3.69501	2.23558	0.00156233	0.0560212	0.0272469	1463.03	2.05025	21.5072	479.777	0.0842012	0.161174
free-living	N00	fs	30	26.4402	3.55981	TRUE	14/07/2023 12:04	1S	2	68.8066	10.4366	14	14	26.7104	9.95415	35.0714	310.192	302.048	1.81255	2.37152	0.215861	91.3058	0.00031	7.052	1.7616	0.469	0.178741	1.792	7.18501	2.30227	0.994601	0.189296	126.602	18.3561	149.377	12.106	0.746995	242.026	3.69501	2.23558	0.00156233	0.0560212	0.0272469	1463.03	2.05025	21.5072	479.777	0.0842012	0.161174
free-living	N00	fs	30	26.4402	3.55981	TRUE	14/07/2023 12:04	1S	2	68.8066	10.4366	14	14	26.7104	9.95415	35.0714	310.192	302.048	1.81255	2.37152	0.215861	91.3058	0.00031	7.052	1.7616	0.469	0.178741	1.792	7.18501	2.30227	0.994601	0.189296	126.602	18.3561	149.377	12.106	0.746995	242.026	3.69501	2.23558	0.00156233	0.0560212	0.0272469	1463.03	2.05025	21.5072	479.777	0.0842012	0.161174
free-living	N00	fs	30	26.4402	3.55981	TRUE	14/07/2023 12:04	1S	2	68.8066	10.4366	14	14	26.7104	9.95415	35.0714	310.192	302.048	1.81255	2.37152	0.215861	91.3058	0.00031	7.052	1.7616	0.469	0.178741	1.792	7.18501	2.30227	0.994601	0.189296	126.602	18.3561	149.377	12.106	0.746995	242.026	3.69501	2.23558	0.00156233	0.0560212	0.0272469	1463.03	2.05025	21.5072	479.777	0.0842012	0.161174
particle-associated	N01	susp	30	30.5437	0.543661	TRUE	15/07/2023 15:24	4T	9	70.9999	10.9999	22	22	30.8602	8.17224	35.0673	294.884	287.049	1.04737	0.000513	0.286669	93.0843	0.000939	6.56	2.69	0.49	0.171837	1.75	7.18501	2.30227	0.994601	0.189296	107.47	24.5213	159.374	1.79004	0.12	69.971	3.32187	1.43663	0.00156233	0.0560212	0.0272469	1463.03	2.05025	21.5072	479.777	0.0842012	0.161174
free-living	N01	susp	30	30.5437	0.543661	TRUE	15/07/2023 15:24	4T	9	70.9999	10.9999	22	22	30.8602	8.17224	35.0673	294.884	287.049	1.04737	0.000513	0.286669	93.0843	0.000939	6.56	2.69	0.49	0.171837	1.75	7.18501	2.30227	0.994601	0.189296	107.47	24.5213	159.374	1.79004	0.12	69.971	3.32187	1.43663	0.00156233	0.0560212	0.0272469	1463.03	2.05025	21.5072	479.777	0.0842012	0.161174
particle-associated	N01	susp	30	30.5437	0.543661	TRUE	15/07/2023 15:24	4T	9	70.9999	10.9999	22	22	30.8602	8.17224	35.0673	294.884	287.049	1.04737	0.000513	0.286669	93.0843	0.000939	6.56	2.69	0.49	0.171837	1.75	7.18501	2.30227	0.994601	0.189296	107.47	24.5213	159.374	1.79004	0.12	69.971	3.32187	1.43663	0.00156233	0.0560212	0.0272469	1463.03	2.05025	21.5072	479.777	0.0842012	0.161174
free-living	N01	susp	30	30.5437	0.543661	TRUE	15/07/2023 15:24	4T	9	70.9999	10.9999	22	22	30.8602	8.17224	35.0673	294.884	287.049	1.04737	0.000513	0.286669	93.0843	0.000939	6.56	2.69	0.49	0.171837	1.75	7.18501	2.30227	0.994601	0.189296	107.47	24.5213	159.374	1.79004	0.12	69.971	3.32187	1.43663	0.00156233	0.0560212	0.0272469	1463.03	2.05025	21.5072	479.777	0.0842012	0.161174
particle-associated	N01	susp	30	30.5437	0.543661	TRUE	15/07/2023 15:24	4T	9	70.9999	10.9999	22	22	30.8602	8.17224	35.0673	294.884	287.049	1.04737	0.000513	0.286669	93.0843	0.000939	6.56	2.69	0.49	0.171837	1.75	7.18501	2.30227	0.994601	0.189296	107.47	24.5213	159.374	1.79004	0.12	69.971	3.32187	1.43663	0.00156233	0.0560212	0.0272469	1463.03	2.05025	21.5072	479.777	0.0842012	0.161174
free-living	N01	susp	30	30.5437	0.543661	TRUE	15/07/2023 15:24	4T	9	70.9999	10.9999	22	22	30.8602	8.17224	35.0673	294.884	287.049	1.04737	0.000513	0.286669	93.0843	0.000939	6.56	2.69	0.49	0.171837	1.75	7.18501	2.30227	0.994601	0.189296	107.47	24.5213	159.374	1.79004	0.12	69.971	3.32187	1.43663	0.00156233	0.0560212	0.0272469	1463.03	2.05025	21.5072	479.777	0.0842012	0.161174
particle-associated	N01	ss	30	30.5437	0.543661	TRUE	15/07/2023 15:24	4T	9	70.9999	10.9999	22	22	30.8602	8.17224	35.0673	294.884	287.049	1.04737	0.000513	0.286669	93.0843	0.000939	6.56	2.69	0.49	0.171837	1.75	7.18501	2.30227	0.994601	0.189296	107.47	24.5213	159.374	1.79004	0.12	69.971	3.32187	1.43663	0.00156233	0.0560212	0.0272469	1463.03	2.05025	21.5072	479.777	0.0842012	0.161174
free-living	N01	ss	30	30.5437	0.543661	TRUE	15/07/2023 15:24	4T	9	70.9999	10.9999	22	22	30.8602	8.17224	35.0673	294.884	287.049	1.04737	0.000513	0.286669	93.0843	0.000939	6.56	2.69	0.49	0.171837	1.75	7.18501	2.30227	0.994601	0.189296	107.47	24.5213	159.374	1.79004	0.12	69.971	3.32187	1.43663	0.00156233	0.0560212	0.0272469	1463.03	2.05025	21.5072	479.777	0.0842012	0.161174
particle-associated	N01	ss	30	30.5437	0.543661	TRUE	15/07/2023 15:24	4T	9	70.9999	10.9999	22	22	30.8602	8.17224	35.0673	294.884	287.049	1.04737	0.000513	0.286669	93.0843	0.000939	6.56	2.69	0.49	0.171837	1.75	7.18501	2.30227	0.994601	0.189296	107.47	24.5213	159.374	1.79004	0.12	69.971	3.32187	1.43663	0.00156233	0.0560212	0.0272469	1463.03	2.05025	21.5072	479.777	0.0842012	0.161174
free-living	N01	ss	30	30.5437	0.543661	TRUE	15/07/2023 15:24	4T	9	70.9999	10.9999	22	22	30.8602	8.17224	35.0673	294.884	287.049	1.04737	0.000513	0.286669	93.0843	0.000939	6.56	2.69	0.49	0.171837	1.75	7.18501	2.30227	0.994601	0.189296	107.47	24.5213	159.374	1.79004	0.12	69.971	3.32187	1.43663	0.00156233	0.0560212	0.0272469	1463.03	2.05025	21.5072	479.777	0.0842012	0.161174
particle-associated	N01	ss	30	30.5437	0.543661	TRUE	15/07/2023 15:24	4T	9	70.9999	10.9999	22	22	30.8602	8.17224	35.0673	294.884	287.049	1.04737	0.000513	0.286669	93.0843	0.000939	6.56	2.69	0.49	0.171837	1.75	7.18501	2.30227	0.994601	0.189296	107.47	24.5213	159.374	1.79004	0.12	69.971	3.32187	1.43663	0.00156233	0.0560212	0.0272469	1463.03	2.05025	21.5072	479.777	0.0842012	0.161174
free-living	N01	ss	30	30.5437	0.543661	TRUE	15/07/2023 15:24	4T	9	70.9999	10.9999	22	22	30.8602	8.17224	35.0673	294.884	287.049	1.04737	0.000513	0.286669	93.0843	0.000939	6.56	2.69	0.49	0.171837	1.75	7.18501	2.30227	0.994601	0.189296	107.47	24.5213	159.374	1.79004	0.12	69.971	3.32187	1.43663	0.00156233	0.0560212	0.0272469	1463.03	2.05025	21.5072	479.777	0.0842012	0.161174
particle-associated	N01	fs	30	30.5437	0.543661	TRUE	15/07/2023 15:24	4T	9	70.9999	10.9999	22	22	30.8602	8.17224	35.0673	294.884	287.049	1.04737	0.000513	0.286669	93.0843	0.000939	6.56	2.69	0.49	0.171837	1.75	7.18501	2.30227	0.994601	0.189296	107.47	24.5213	159.374	1.79004	0.12	69.971	3.32187	1.43663	0.00156233	0.0560212	0.0272469	1463.03	2.05025	21.5072	479.777	0.0842012	0.161174
free-living	N01	fs	30	30.5437	0.543661	TRUE	15/07/2023 15:24	4T	9	70.9999	10.9999	22	22	30.8602	8.17224	35.0673	294.884	287.049	1.04737	0.000513	0.286669	93.0843	0.000939	6.56	2.69	0.49	0.171837	1.75	7.18501	2.30227	0.994601	0.189296	107.47	24.5213	159.374	1.79004	0.12	69.971	3.32187	1.43663	0.00156233	0.0560212	0.0272469	1463.03	2.05025	21.5072	479.777	0.0842012	0.161174
particle-associated	N01	fs	30	30.5437	0.543661	TRUE	15/07/2023 15:24	4T	9	70.9999	10.9999	22	22	30.8602	8.17224	35.0673	294.884	287.049	1.04737	0.000513	0.286669	93.0843	0.000939	6.56	2.69	0.49	0.171837	1.75	7.18501	2.30227	0.994601	0.189296	107.47	24.5213	159.374	1.79004	0.12	69.971	3.32187	1.43663	0.00156233	0.0560212	0.0272469	1463.03	2.05025	21.5072	479.777	0.0842012	0.161174
free-living	N01	fs	30	30.5437	0.543661	TRUE	15/07/2023 15:24	4T	9	70.9999	10.9999	22	22	30.8602	8.17224	35.0673	294.884	287.049	1.04737	0.000513	0.286669	93.0843	0.000939	6.56	2.69	0.49	0.171837	1.75	7.18501	2.30227	0.994601	0.189296	107.47	24.5213	159.374	1.79004	0.12	69.971	3.32187	1.43663	0.00156233	0.0560212	0.0272469	1463.03	2.05025	21.5072	479.777	0.0842012	0.161174
particle-associated	N01	fs	30	30.5437	0.543661	TRUE	15/07/2023 15:24	4T	9	70.9999	10.9999	22	22	30.8602	8.17224	35.0673	294.884	287.049	1.04737	0.000513	0.286669	93.0843	0.000939	6.56	2.69	0.49	0.171837	1.75	7.18501	2.30227	0.994601	0.189296	107.47	24.5213	159.374	1.79004	0.12	69.971	3.32187	1.43663	0.00156233	0.0560212	0.0272469	1463.03	2.05025	21.5072	479.777	0.0842012	0.161174
free-living	N01	fs	30	30.5437	0.543661	TRUE	15/07/2023 15:24	4T	9	70.9999	10.9999	22	22	30.8602	8.17224	35.0673	294.884	287.049	1.04737	0.000513	0.286669	93.0843	0.000939	6.56	2.69	0.49	0.171837	1.75	7.18501	2.30227	0.994601	0.189296	107.47	24.5213	159.374	1.79004	0.12	69.971	3.32187	1.43663	0.00156233	0.0560212	0.0272469	1463.03	2.05025	21.5072	479.777	0.0842012	0.161174
particle-associated	N04	susp	30	26.2832	3.71679	TRUE	18/07/2023 12:09	7S	12	73.7246	23.368	13	85	26.5591	7.60283	34.988	333.219	324.356	2.26223	0.063773	1.22976	70.863	0.004916	6.8208	1.7853	0.4872	0.18032	1.7956	7.18501	2.30227	0.994601	0.189296	119.428	17.5057	149.377	15.9267	0.955993	192.22	3.8248	2.02533	0.00156233	0.0560212	0.0272469	1463.03	2.05025	21.5072	479.777	0.0842012	0.161174
free-living	N04	susp	30	26.2832	3.71679	TRUE	18/07/2023 12:09	7S	12	73.7246	23.368	13	85	26.5591	7.60283	34.988	333.219	324.356	2.26223	0.063773	1.22976	70.863	0.004916	6.8208	1.7853	0.4872	0.18032	1.7956	7.18501	2.30227	0.994601	0.189296	119.428	17.5057	149.377	15.9267	0.955993	192.22	3.8248	2.02533	0.00156233	0.0560212	0.0272469	1463.03	2.05025	21.5072	479.777	0.0842012	0.161174
particle-associated	N04	susp	30	26.2832	3.71679	TRUE	18/07/2023 12:09	7S	12	73.7246	23.368	13	85	26.5591	7.60283	34.988	333.219	324.356	2.26223	0.063773	1.22976	70.863	0.004916	6.8208	1.7853	0.4872	0.18032	1.7956	7.18501	2.30227	0.994601	0.189296	119.428	17.5057	149.377	15.9267	0.955993	192.22	3.8248	2.02533	0.00156233	0.0560212	0.0272469	1463.03	2.05025	21.5072	479.777	0.0842012	0.161174
free-living	N04	susp	30	26.2832	3.71679	TRUE	18/07/2023 12:09	7S	12	73.7246	23.368	13	85	26.5591	7.60283	34.988	333.219	324.356	2.26223	0.063773	1.22976	70.863	0.004916	6.8208	1.7853	0.4872	0.18032	1.7956	7.18501	2.30227	0.994601	0.189296	119.428	17.5057	149.377	15.9267	0.955993	192.22	3.8248	2.02533	0.00156233	0.0560212	0.0272469	1463.03	2.05025	21.5072	479.777	0.0842012	0.161174
particle-associated	N04	susp	30	26.2832	3.71679	TRUE	18/07/2023 12:09	7S	12	73.7246	23.368	13	85	26.5591	7.60283	34.988	333.219	324.356	2.26223	0.063773	1.22976	70.863	0.004916	6.8208	1.7853	0.4872	0.18032	1.7956	7.18501	2.30227	0.994601	0.189296	119.428	17.5057	149.377	15.9267	0.955993	192.22	3.8248	2.02533	0.00156233	0.0560212	0.0272469	1463.03	2.05025	21.5072	479.777	0.0842012	0.161174
free-living	N04	susp	30	26.2832	3.71679	TRUE	18/07/2023 12:09	7S	12	73.7246	23.368	13	85	26.5591	7.60283	34.988	333.219	324.356	2.26223	0.063773	1.22976	70.863	0.004916	6.8208	1.7853	0.4872	0.18032	1.7956	7.18501	2.30227	0.994601	0.189296	119.428	17.5057	149.377	15.9267	0.955993	192.22	3.8248	2.02533	0.00156233	0.0560212	0.0272469	1463.03	2.05025	21.5072	479.777	0.0842012	0.161174
particle-associated	N04	susp	30	26.2832	3.71679	TRUE	18/07/2023 12:09	7S	12	73.7246	23.368	13	85	26.5591	7.60283	34.988	333.219	324.356	2.26223	0.063773	1.22976	70.863	0.004916	6.8208	1.7853	0.4872	0.18032	1.7956	7.18501	2.30227	0.994601	0.189296	119.428	17.5057	149.377	15.9267	0.955993	192.22	3.8248	2.02533	0.00156233	0.0560212	0.0272469	1463.03	2.05025	21.5072	479.777	0.0842012	0.161174
free-living	N04	susp	30	26.2832	3.71679	TRUE	18/07/2023 12:09	7S	12	73.7246	23.368	13	85	26.5591	7.60283	34.988	333.219	324.356	2.26223	0.063773	1.22976	70.863	0.004916	6.8208	1.7853	0.4872	0.18032	1.7956	7.18501	2.30227	0.994601	0.189296	119.428	17.5057	149.377	15.9267	0.955993	192.22	3.8248	2.02533	0.00156233	0.0560212	0.0272469	1463.03	2.05025	21.5072	479.777	0.0842012	0.161174
particle-associated	N04	susp	30	26.2832	3.71679	TRUE	18/07/2023 12:09	7S	12	73.7246	23.368	13	85	26.5591	7.60283	34.988	333.219	324.356	2.26223	0.063773	1.22976	70.863	0.004916	6.8208	1.7853	0.4872	0.18032	1.7956	7.18501	2.30227	0.994601	0.189296	119.428	17.5057	149.377	15.9267	0.955993	192.22	3.8248	2.02533	0.00156233	0.0560212	0.0272469	1463.03	2.05025	21.5072	479.777	0.0842012	0.161174
free-living	N04	susp	30	26.2832	3.71679	TRUE	18/07/2023 12:09	7S	12	73.7246	23.368	13	85	26.5591	7.60283	34.988	333.219	324.356	2.26223	0.063773	1.22976	70.863	0.004916	6.8208	1.7853	0.4872	0.18032	1.7956	7.18501	2.30227	0.994601	0.189296	119.428	17.5057	149.377	15.9267	0.955993	192.22	3.8248	2.02533	0.00156233	0.0560212	0.0272469	1463.03	2.05025	21.5072	479.777	0.0842012	0.161174
particle-associated	N04	susp	30	26.2832	3.71679	TRUE	18/07/2023 12:09	7S	12	73.7246	23.368	13	85	26.5591	7.60283	34.988	333.219	324.356	2.26223	0.063773	1.22976	70.863	0.004916	6.8208	1.7853	0.4872	0.18032	1.7956	7.18501	2.30227	0.994601	0.189296	119.428	17.5057	149.377	15.9267	0.955993	192.22	3.8248	2.02533	0.00156233	0.0560212	0.0272469	1463.03	2.05025	21.5072	479.777	0.0842012	0.161174
free-living	N04	susp	30	26.2832	3.71679	TRUE	18/07/2023 12:09	7S	12	73.7246	23.368	13	85	26.5591	7.60283	34.988	333.219	324.356	2.26223	0.063773	1.22976	70.863	0.004916	6.8208	1.7853	0.4872	0.18032	1.7956	7.18501	2.30227	0.994601	0.189296	119.428	17.5057	149.377	15.9267	0.955993	192.22	3.8248	2.02533	0.00156233	0.0560212	0.0272469	1463.03	2.05025	21.5072	479.777	0.0842012	0.161174
particle-associated	N04	fs	30	26.2832	3.71679	TRUE	18/07/2023 12:09	7S	12	73.7246	23.368	13	85	26.5591	7.60283	34.988	333.219	324.356	2.26223	0.063773	1.22976	70.863	0.004916	6.8208	1.7853	0.4872	0.18032	1.7956	7.18501	2.30227	0.994601	0.189296	119.428	17.5057	149.377	15.9267	0.955993	192.22	3.8248	2.02533	0.00156233	0.0560212	0.0272469	1463.03	2.05025	21.5072	479.777	0.0842012	0.161174
free-living	N04	fs	30	26.2832	3.71679	TRUE	18/07/2023 12:09	7S	12	73.7246	23.368	13	85	26.5591	7.60283	34.988	333.219	324.356	2.26223	0.063773	1.22976	70.863	0.004916	6.8208	1.7853	0.4872	0.18032	1.7956	7.18501	2.30227	0.994601	0.189296	119.428	17.5057	149.377	15.9267	0.955993	192.22	3.8248	2.02533	0.00156233	0.0560212	0.0272469	1463.03	2.05025	21.5072	479.777	0.0842012	0.161174
particle-associated	N04	fs	30	26.2832	3.71679	TRUE	18/07/2023 12:09	7S	12	73.7246	23.368	13	85	26.5591	7.60283	34.988	333.219	324.356	2.26223	0.063773	1.22976	70.863	0.004916	6.8208	1.7853	0.4872	0.18032	1.7956	7.18501	2.30227	0.994601	0.189296	119.428	17.5057	149.377	15.9267	0.955993	192.22	3.8248	2.02533	0.00156233	0.0560212	0.0272469	1463.03	2.05025	21.5072	479.777	0.0842012	0.161174
free-living	N04	fs	30	26.2832	3.71679	TRUE	18/07/2023 12:09	7S	12	73.7246	23.368	13	85	26.5591	7.60283	34.988	333.219	324.356	2.26223	0.063773	1.22976	70.863	0.004916	6.8208	1.7853	0.4872	0.18032	1.7956	7.18501	2.30227	0.994601	0.189296	119.428	17.5057	149.377	15.9267	0.955993	192.22	3.8248	2.02533	0.00156233	0.0560212	0.0272469	1463.03	2.05025	21.5072	479.777	0.0842012	0.161174
particle-associated	N04	fs	30	26.2832	3.71679	TRUE	18/07/2023 12:09	7S	12	73.7246	23.368	13	85	26.5591	7.60283	34.988	333.219	324.356	2.26223	0.063773	1.22976	70.863	0.004916	6.8208	1.7853	0.4872	0.18032	1.7956	7.18501	2.30227	0.994601	0.189296	119.428	17.5057	149.377	15.9267	0.955993	192.22	3.8248	2.02533	0.00156233	0.0560212	0.0272469	1463.03	2.05025	21.5072	479.777	0.0842012	0.161174
free-living	N04	fs	30	26.2832	3.71679	TRUE	18/07/2023 12:09	7S	12	73.7246	23.368	13	85	26.5591	7.60283	34.988	333.219	324.356	2.26223	0.063773	1.22976	70.863	0.004916	6.8208	1.7853	0.4872	0.18032	1.7956	7.18501	2.30227	0.994601	0.189296	119.428	17.5057	149.377	15.9267	0.955993	192.22	3.8248	2.02533	0.00156233	0.0560212	0.0272469	1463.03	2.05025	21.5072	479.777	0.0842012	0.161174
particle-associated	N12	susp	37	38.4597	1.4597	TRUE	20/07/2023 15:01	14T	30	75.5009	22.4999	4	100	38.868	3.60039	34.573	347.251	337.962	0.423723	2.80318	0.135836	96.6616	0.000279	7.4144	2.0403	0.4657	0.183806	1.8376	7.18501	2.30227	0.994601	0.189296	133.299	12.1909	124.679	28.5351	1.35309	341.636	4.32774	2.4248	0.00156233	0.0560212	0.0272469	1463.03	2.05025	21.5072	479.777	0.0842012	0.161174
free-living	N12	susp	37	38.4597	1.4597	TRUE	20/07/2023 15:01	14T	30	75.5009	22.4999	4	100	38.868	3.60039	34.573	347.251	337.962	0.423723	2.80318	0.135836	96.6616	0.000279	7.4144	2.0403	0.4657	0.183806	1.8376	7.18501	2.30227	0.994601	0.189296	133.299	12.1909	124.679	28.5351	1.35309	341.636	4.32774	2.4248	0.00156233	0.0560212	0.0272469	1463.03	2.05025	21.5072	479.777	0.0842012	0.161174
particle-associated	N12	susp	37	38.4597	1.4597	TRUE	20/07/2023 15:01	14T	30	75.5009	22.4999	4	100	38.868	3.60039	34.573	347.251	337.962	0.423723	2.80318	0.135836	96.6616	0.000279	7.4144	2.0403	0.4657	0.183806	1.8376	7.18501	2.30227	0.994601	0.189296	133.299	12.1909	124.679	28.5351	1.35309	341.636	4.32774	2.4248	0.00156233	0.0560212	0.0272469	1463.03	2.05025	21.5072	479.777	0.0842012	0.161174
free-living	N12	susp	37	38.4597	1.4597	TRUE	20/07/2023 15:01	14T	30	75.5009	22.4999	4	100	38.868	3.60039	34.573	347.251	337.962	0.423723	2.80318	0.135836	96.6616	0.000279	7.4144	2.0403	0.4657	0.183806	1.8376	7.18501	2.30227	0.994601	0.189296	133.299	12.1909	124.679	28.5351	1.35309	341.636	4.32774	2.4248	0.00156233	0.0560212	0.0272469	1463.03	2.05025	21.5072	479.777	0.0842012	0.161174
particle-associated	N12	susp	37	38.4597	1.4597	TRUE	20/07/2023 15:01	14T	30	75.5009	22.4999	4	100	38.868	3.60039	34.573	347.251	337.962	0.423723	2.80318	0.135836	96.6616	0.000279	7.4144	2.0403	0.4657	0.183806	1.8376	7.18501	2.30227	0.994601	0.189296	133.299	12.1909	124.679	28.5351	1.35309	341.636	4.32774	2.4248	0.00156233	0.0560212	0.0272469	1463.03	2.05025	21.5072	479.777	0.0842012	0.161174
free-living	N12	susp	37	38.4597	1.4597	TRUE	20/07/2023 15:01	14T	30	75.5009	22.4999	4	100	38.868	3.60039	34.573	347.251	337.962	0.423723	2.80318	0.135836	96.6616	0.000279	7.4144	2.0403	0.4657	0.183806	1.8376	7.18501	2.30227	0.994601	0.189296	133.299	12.1909	124.679	28.5351	1.35309	341.636	4.32774	2.4248	0.00156233	0.0560212	0.0272469	1463.03	2.05025	21.5072	479.777	0.0842012	0.161174
particle-associated	N12	ss	37	38.4597	1.4597	TRUE	20/07/2023 15:01	14T	30	75.5009	22.4999	4	100	38.868	3.60039	34.573	347.251	337.962	0.423723	2.80318	0.135836	96.6616	0.000279	7.4144	2.0403	0.4657	0.183806	1.8376	7.18501	2.30227	0.994601	0.189296	133.299	12.1909	124.679	28.5351	1.35309	341.636	4.32774	2.4248	0.00156233	0.0560212	0.0272469	1463.03	2.05025	21.5072	479.777	0.0842012	0.161174
free-living	N12	ss	37	38.4597	1.4597	TRUE	20/07/2023 15:01	14T	30	75.5009	22.4999	4	100	38.868	3.60039	34.573	347.251	337.962	0.423723	2.80318	0.135836	96.6616	0.000279	7.4144	2.0403	0.4657	0.183806	1.8376	7.18501	2.30227	0.994601	0.189296	133.299	12.1909	124.679	28.5351	1.35309	341.636	4.32774	2.4248	0.00156233	0.0560212	0.0272469	1463.03	2.05025	21.5072	479.777	0.0842012	0.161174
particle-associated	N12	ss	37	38.4597	1.4597	TRUE	20/07/2023 15:01	14T	30	75.5009	22.4999	4	100	38.868	3.60039	34.573	347.251	337.962	0.423723	2.80318	0.135836	96.6616	0.000279	7.4144	2.0403	0.4657	0.183806	1.8376	7.18501	2.30227	0.994601	0.189296	133.299	12.1909	124.679	28.5351	1.35309	341.636	4.32774	2.4248	0.00156233	0.0560212	0.0272469	1463.03	2.05025	21.5072	479.777	0.0842012	0.161174
free-living	N12	ss	37	38.4597	1.4597	TRUE	20/07/2023 15:01	14T	30	75.5009	22.4999	4	100	38.868	3.60039	34.573	347.251	337.962	0.423723	2.80318	0.135836	96.6616	0.000279	7.4144	2.0403	0.4657	0.183806	1.8376	7.18501	2.30227	0.994601	0.189296	133.299	12.1909	124.679	28.5351	1.35309	341.636	4.32774	2.4248	0.00156233	0.0560212	0.0272469	1463.03	2.05025	21.5072	479.777	0.0842012	0.161174
particle-associated	N12	ss	37	38.4597	1.4597	TRUE	20/07/2023 15:01	14T	30	75.5009	22.4999	4	100	38.868	3.60039	34.573	347.251	337.962	0.423723	2.80318	0.135836	96.6616	0.000279	7.4144	2.0403	0.4657	0.183806	1.8376	7.18501	2.30227	0.994601	0.189296	133.299	12.1909	124.679	28.5351	1.35309	341.636	4.32774	2.4248	0.00156233	0.0560212	0.0272469	1463.03	2.05025	21.5072	479.777	0.0842012	0.161174
free-living	N12	ss	37	38.4597	1.4597	TRUE	20/07/2023 15:01	14T	30	75.5009	22.4999	4	100	38.868	3.60039	34.573	347.251	337.962	0.423723	2.80318	0.135836	96.6616	0.000279	7.4144	2.0403	0.4657	0.183806	1.8376	7.18501	2.30227	0.994601	0.189296	133.299	12.1909	124.679	28.5351	1.35309	341.636	4.32774	2.4248	0.00156233	0.0560212	0.0272469	1463.03	2.05025	21.5072	479.777	0.0842012	0.161174
particle-associated	N12	fs	37	38.4597	1.4597	TRUE	20/07/2023 15:01	14T	30	75.5009	22.4999	4	100	38.868	3.60039	34.573	347.251	337.962	0.423723	2.80318	0.135836	96.6616	0.000279	7.4144	2.0403	0.4657	0.183806	1.8376	7.18501	2.30227	0.994601	0.189296	133.299	12.1909	124.679	28.5351	1.35309	341.636	4.32774	2.4248	0.00156233	0.0560212	0.0272469	1463.03	2.05025	21.5072	479.777	0.0842012	0.161174
free-living	N12	fs	37	38.4597	1.4597	TRUE	20/07/2023 15:01	14T	30	75.5009	22.4999	4	100	38.868	3.60039	34.573	347.251	337.962	0.423723	2.80318	0.135836	96.6616	0.000279	7.4144	2.0403	0.4657	0.183806	1.8376	7.18501	2.30227	0.994601	0.189296	133.299	12.1909	124.679	28.5351	1.35309	341.636	4.32774	2.4248	0.00156233	0.0560212	0.0272469	1463.03	2.05025	21.5072	479.777	0.0842012	0.161174
particle-associated	N12	fs	37	38.4597	1.4597	TRUE	20/07/2023 15:01	14T	30	75.5009	22.4999	4	100	38.868	3.60039	34.573	347.251	337.962	0.423723	2.80318	0.135836	96.6616	0.000279	7.4144	2.0403	0.4657	0.183806	1.8376	7.18501	2.30227	0.994601	0.189296	133.299	12.1909	124.679	28.5351	1.35309	341.636	4.32774	2.4248	0.00156233	0.0560212	0.0272469	1463.03	2.05025	21.5072	479.777	0.0842012	0.161174
free-living	N12	fs	37	38.4597	1.4597	TRUE	20/07/2023 15:01	14T	30	75.5009	22.4999	4	100	38.868	3.60039	34.573	347.251	337.962	0.423723	2.80318	0.135836	96.6616	0.000279	7.4144	2.0403	0.4657	0.183806	1.8376	7.18501	2.30227	0.994601	0.189296	133.299	12.1909	124.679	28.5351	1.35309	341.636	4.32774	2.4248	0.00156233	0.0560212	0.0272469	1463.03	2.05025	21.5072	479.777	0.0842012	0.161174
particle-associated	N12	fs	37	38.4597	1.4597	TRUE	20/07/2023 15:01	14T	30	75.5009	22.4999	4	100	38.868	3.60039	34.573	347.251	337.962	0.423723	2.80318	0.135836	96.6616	0.000279	7.4144	2.0403	0.4657	0.183806	1.8376	7.18501	2.30227	0.994601	0.189296	133.299	12.1909	124.679	28.5351	1.35309	341.636	4.32774	2.4248	0.00156233	0.0560212	0.0272469	1463.03	2.05025	21.5072	479.777	0.0842012	0.161174
free-living	N12	fs	37	38.4597	1.4597	TRUE	20/07/2023 15:01	14T	30	75.5009	22.4999	4	100	38.868	3.60039	34.573	347.251	337.962	0.423723	2.80318	0.135836	96.6616	0.000279	7.4144	2.0403	0.4657	0.183806	1.8376	7.18501	2.30227	0.994601	0.189296	133.299	12.1909	124.679	28.5351	1.35309	341.636	4.32774	2.4248	0.00156233	0.0560212	0.0272469	1463.03	2.05025	21.5072	479.777	0.0842012	0.161174
particle-associated	N07	susp	55	56.1347	1.13469	TRUE	21/07/2023 12:05	15S	33	78	29.9991	12	168	56.7389	-1.80558	34.4625	369.014	359.051	0.513599	0.306749	-0.092945	98.6343	0.000134	8.6392	2.2099	0.6175	0.179567	1.852	7.18501	2.30227	0.994601	0.189296	131.386	14.3168	126.443	28.1531	1.41579	269.192	4.21418	2.27763	0.00156233	0.0560212	0.0272469	1463.03	2.05025	21.5072	479.777	0.0842012	0.161174
free-living	N07	susp	55	56.1347	1.13469	TRUE	21/07/2023 12:05	15S	33	78	29.9991	12	168	56.7389	-1.80558	34.4625	369.014	359.051	0.513599	0.306749	-0.092945	98.6343	0.000134	8.6392	2.2099	0.6175	0.179567	1.852	7.18501	2.30227	0.994601	0.189296	131.386	14.3168	126.443	28.1531	1.41579	269.192	4.21418	2.27763	0.00156233	0.0560212	0.0272469	1463.03	2.05025	21.5072	479.777	0.0842012	0.161174
particle-associated	N07	susp	55	56.1347	1.13469	TRUE	21/07/2023 12:05	15S	33	78	29.9991	12	168	56.7389	-1.80558	34.4625	369.014	359.051	0.513599	0.306749	-0.092945	98.6343	0.000134	8.6392	2.2099	0.6175	0.179567	1.852	7.18501	2.30227	0.994601	0.189296	131.386	14.3168	126.443	28.1531	1.41579	269.192	4.21418	2.27763	0.00156233	0.0560212	0.0272469	1463.03	2.05025	21.5072	479.777	0.0842012	0.161174
free-living	N07	susp	55	56.1347	1.13469	TRUE	21/07/2023 12:05	15S	33	78	29.9991	12	168	56.7389	-1.80558	34.4625	369.014	359.051	0.513599	0.306749	-0.092945	98.6343	0.000134	8.6392	2.2099	0.6175	0.179567	1.852	7.18501	2.30227	0.994601	0.189296	131.386	14.3168	126.443	28.1531	1.41579	269.192	4.21418	2.27763	0.00156233	0.0560212	0.0272469	1463.03	2.05025	21.5072	479.777	0.0842012	0.161174
particle-associated	N07	susp	55	56.1347	1.13469	TRUE	21/07/2023 12:05	15S	33	78	29.9991	12	168	56.7389	-1.80558	34.4625	369.014	359.051	0.513599	0.306749	-0.092945	98.6343	0.000134	8.6392	2.2099	0.6175	0.179567	1.852	7.18501	2.30227	0.994601	0.189296	131.386	14.3168	126.443	28.1531	1.41579	269.192	4.21418	2.27763	0.00156233	0.0560212	0.0272469	1463.03	2.05025	21.5072	479.777	0.0842012	0.161174
particle-associated	N07	ss	55	56.1347	1.13469	TRUE	21/07/2023 12:05	15S	33	78	29.9991	12	168	56.7389	-1.80558	34.4625	369.014	359.051	0.513599	0.306749	-0.092945	98.6343	0.000134	8.6392	2.2099	0.6175	0.179567	1.852	7.18501	2.30227	0.994601	0.189296	131.386	14.3168	126.443	28.1531	1.41579	269.192	4.21418	2.27763	0.00156233	0.0560212	0.0272469	1463.03	2.05025	21.5072	479.777	0.0842012	0.161174
free-living	N07	ss	55	56.1347	1.13469	TRUE	21/07/2023 12:05	15S	33	78	29.9991	12	168	56.7389	-1.80558	34.4625	369.014	359.051	0.513599	0.306749	-0.092945	98.6343	0.000134	8.6392	2.2099	0.6175	0.179567	1.852	7.18501	2.30227	0.994601	0.189296	131.386	14.3168	126.443	28.1531	1.41579	269.192	4.21418	2.27763	0.00156233	0.0560212	0.0272469	1463.03	2.05025	21.5072	479.777	0.0842012	0.161174
particle-associated	N07	ss	55	56.1347	1.13469	TRUE	21/07/2023 12:05	15S	33	78	29.9991	12	168	56.7389	-1.80558	34.4625	369.014	359.051	0.513599	0.306749	-0.092945	98.6343	0.000134	8.6392	2.2099	0.6175	0.179567	1.852	7.18501	2.30227	0.994601	0.189296	131.386	14.3168	126.443	28.1531	1.41579	269.192	4.21418	2.27763	0.00156233	0.0560212	0.0272469	1463.03	2.05025	21.5072	479.777	0.0842012	0.161174
free-living	N07	ss	55	56.1347	1.13469	TRUE	21/07/2023 12:05	15S	33	78	29.9991	12	168	56.7389	-1.80558	34.4625	369.014	359.051	0.513599	0.306749	-0.092945	98.6343	0.000134	8.6392	2.2099	0.6175	0.179567	1.852	7.18501	2.30227	0.994601	0.189296	131.386	14.3168	126.443	28.1531	1.41579	269.192	4.21418	2.27763	0.00156233	0.0560212	0.0272469	1463.03	2.05025	21.5072	479.777	0.0842012	0.161174
particle-associated	N07	ss	55	56.1347	1.13469	TRUE	21/07/2023 12:05	15S	33	78	29.9991	12	168	56.7389	-1.80558	34.4625	369.014	359.051	0.513599	0.306749	-0.092945	98.6343	0.000134	8.6392	2.2099	0.6175	0.179567	1.852	7.18501	2.30227	0.994601	0.189296	131.386	14.3168	126.443	28.1531	1.41579	269.192	4.21418	2.27763	0.00156233	0.0560212	0.0272469	1463.03	2.05025	21.5072	479.777	0.0842012	0.161174
particle-associated	N07	ss	55	56.1347	1.13469	TRUE	21/07/2023 12:05	15S	33	78	29.9991	12	168	56.7389	-1.80558	34.4625	369.014	359.051	0.513599	0.306749	-0.092945	98.6343	0.000134	8.6392	2.2099	0.6175	0.179567	1.852	7.18501	2.30227	0.994601	0.189296	131.386	14.3168	126.443	28.1531	1.41579	269.192	4.21418	2.27763	0.00156233	0.0560212	0.0272469	1463.03	2.05025	21.5072	479.777	0.0842012	0.161174
free-living	N07	fs	55	56.1347	1.13469	TRUE	21/07/2023 12:05	15S	33	78	29.9991	12	168	56.7389	-1.80558	34.4625	369.014	359.051	0.513599	0.306749	-0.092945	98.6343	0.000134	8.6392	2.2099	0.6175	0.179567	1.852	7.18501	2.30227	0.994601	0.189296	131.386	14.3168	126.443	28.1531	1.41579	269.192	4.21418	2.27763	0.00156233	0.0560212	0.0272469	1463.03	2.05025	21.5072	479.777	0.0842012	0.161174
particle-associated	N07	fs	55	56.1347	1.13469	TRUE	21/07/2023 12:05	15S	33	78	29.9991	12	168	56.7389	-1.80558	34.4625	369.014	359.051	0.513599	0.306749	-0.092945	98.6343	0.000134	8.6392	2.2099	0.6175	0.179567	1.852	7.18501	2.30227	0.994601	0.189296	131.386	14.3168	126.443	28.1531	1.41579	269.192	4.21418	2.27763	0.00156233	0.0560212	0.0272469	1463.03	2.05025	21.5072	479.777	0.0842012	0.161174
free-living	N07	fs	55	56.1347	1.13469	TRUE	21/07/2023 12:05	15S	33	78	29.9991	12	168	56.7389	-1.80558	34.4625	369.014	359.051	0.513599	0.306749	-0.092945	98.6343	0.000134	8.6392	2.2099	0.6175	0.179567	1.852	7.18501	2.30227	0.994601	0.189296	131.386	14.3168	126.443	28.1531	1.41579	269.192	4.21418	2.27763	0.00156233	0.0560212	0.0272469	1463.03	2.05025	21.5072	479.777	0.0842012	0.161174
particle-associated	N07	fs	55	56.1347	1.13469	TRUE	21/07/2023 12:05	15S	33	78	29.9991	12	168	56.7389	-1.80558	34.4625	369.014	359.051	0.513599	0.306749	-0.092945	98.6343	0.000134	8.6392	2.2099	0.6175	0.179567	1.852	7.18501	2.30227	0.994601	0.189296	131.386	14.3168	126.443	28.1531	1.41579	269.192	4.21418	2.27763	0.00156233	0.0560212	0.0272469	1463.03	2.05025	21.5072	479.777	0.0842012	0.161174
particle-associated	N07	fs	55	56.1347	1.13469	TRUE	21/07/2023 12:05	15S	33	78	29.9991	12	168	56.7389	-1.80558	34.4625	369.014	359.051	0.513599	0.306749	-0.092945	98.6343	0.000134	8.6392	2.2099	0.6175	0.179567	1.852	7.18501	2.30227	0.994601	0.189296	131.386	14.3168	126.443	28.1531	1.41579	269.192	4.21418	2.27763	0.00156233	0.0560212	0.0272469	1463.03	2.05025	21.5072	479.777	0.0842012	0.161174
free-living	N07	fs	55	56.1347	1.13469	TRUE	21/07/2023 12:05	15S	33	78	29.9991	12	168	56.7389	-1.80558	34.4625	369.014	359.051	0.513599	0.306749	-0.092945	98.6343	0.000134	8.6392	2.2099	0.6175	0.179567	1.852	7.18501	2.30227	0.994601	0.189296	131.386	14.3168	126.443	28.1531	1.41579	269.192	4.21418	2.27763	0.00156233	0.0560212	0.0272469	1463.03	2.05025	21.5072	479.777	0.0842012	0.161174
particle-associated	N10	susp	52	51.5586	0.44143	TRUE	22/07/2023 11:59	18S	41	78.6586	24.65	11	191	52.1144	-1.42705	34.4815	370.468	360.464	1.23992	4.88434	0.069476	94.7123	0.000292	9.16	1.41	0.67	0.22	1.87	7.18501	2.30227	0.994601	0.189296	131.864	13.4664	125.855	26.6248	1.31129	341.636	4.31152	2.44583	0.00156233	0.0560212	0.0272469	1463.03	2.05025	21.5072	479.777	0.0842012	0.161174
free-living	N10	susp	52	51.5586	0.44143	TRUE	22/07/2023 11:59	18S	41	78.6586	24.65	11	191	52.1144	-1.42705	34.4815	370.468	360.464	1.23992	4.88434	0.069476	94.7123	0.000292	9.16	1.41	0.67	0.22	1.87	7.18501	2.30227	0.994601	0.189296	131.864	13.4664	125.855	26.6248	1.31129	341.636	4.31152	2.44583	0.00156233	0.0560212	0.0272469	1463.03	2.05025	21.5072	479.777	0.0842012	0.161174
particle-associated	N10	susp	52	51.5586	0.44143	TRUE	22/07/2023 11:59	18S	41	78.6586	24.65	11	191	52.1144	-1.42705	34.4815	370.468	360.464	1.23992	4.88434	0.069476	94.7123	0.000292	9.16	1.41	0.67	0.22	1.87	7.18501	2.30227	0.994601	0.189296	131.864	13.4664	125.855	26.6248	1.31129	341.636	4.31152	2.44583	0.00156233	0.0560212	0.0272469	1463.03	2.05025	21.5072	479.777	0.0842012	0.161174
free-living	N10	susp	52	51.5586	0.44143	TRUE	22/07/2023 11:59	18S	41	78.6586	24.65	11	191	52.1144	-1.42705	34.4815	370.468	360.464	1.23992	4.88434	0.069476	94.7123	0.000292	9.16	1.41	0.67	0.22	1.87	7.18501	2.30227	0.994601	0.189296	131.864	13.4664	125.855	26.6248	1.31129	341.636	4.31152	2.44583	0.00156233	0.0560212	0.0272469	1463.03	2.05025	21.5072	479.777	0.0842012	0.161174
particle-associated	N10	susp	52	51.5586	0.44143	TRUE	22/07/2023 11:59	18S	41	78.6586	24.65	11	191	52.1144	-1.42705	34.4815	370.468	360.464	1.23992	4.88434	0.069476	94.7123	0.000292	9.16	1.41	0.67	0.22	1.87	7.18501	2.30227	0.994601	0.189296	131.864	13.4664	125.855	26.6248	1.31129	341.636	4.31152	2.44583	0.00156233	0.0560212	0.0272469	1463.03	2.05025	21.5072	479.777	0.0842012	0.161174
free-living	N10	susp	52	51.5586	0.44143	TRUE	22/07/2023 11:59	18S	41	78.6586	24.65	11	191	52.1144	-1.42705	34.4815	370.468	360.464	1.23992	4.88434	0.069476	94.7123	0.000292	9.16	1.41	0.67	0.22	1.87	7.18501	2.30227	0.994601	0.189296	131.864	13.4664	125.855	26.6248	1.31129	341.636	4.31152	2.44583	0.00156233	0.0560212	0.0272469	1463.03	2.05025	21.5072	479.777	0.0842012	0.161174
particle-associated	N10	ss	52	51.5586	0.44143	TRUE	22/07/2023 11:59	18S	41	78.6586	24.65	11	191	52.1144	-1.42705	34.4815	370.468	360.464	1.23992	4.88434	0.069476	94.7123	0.000292	9.16	1.41	0.67	0.22	1.87	7.18501	2.30227	0.994601	0.189296	131.864	13.4664	125.855	26.6248	1.31129	341.636	4.31152	2.44583	0.00156233	0.0560212	0.0272469	1463.03	2.05025	21.5072	479.777	0.0842012	0.161174
free-living	N10	ss	52	51.5586	0.44143	TRUE	22/07/2023 11:59	18S	41	78.6586	24.65	11	191	52.1144	-1.42705	34.4815	370.468	360.464	1.23992	4.88434	0.069476	94.7123	0.000292	9.16	1.41	0.67	0.22	1.87	7.18501	2.30227	0.994601	0.189296	131.864	13.4664	125.855	26.6248	1.31129	341.636	4.31152	2.44583	0.00156233	0.0560212	0.0272469	1463.03	2.05025	21.5072	479.777	0.0842012	0.161174
particle-associated	N10	ss	52	51.5586	0.44143	TRUE	22/07/2023 11:59	18S	41	78.6586	24.65	11	191	52.1144	-1.42705	34.4815	370.468	360.464	1.23992	4.88434	0.069476	94.7123	0.000292	9.16	1.41	0.67	0.22	1.87	7.18501	2.30227	0.994601	0.189296	131.864	13.4664	125.855	26.6248	1.31129	341.636	4.31152	2.44583	0.00156233	0.0560212	0.0272469	1463.03	2.05025	21.5072	479.777	0.0842012	0.161174
free-living	N10	ss	52	51.5586	0.44143	TRUE	22/07/2023 11:59	18S	41	78.6586	24.65	11	191	52.1144	-1.42705	34.4815	370.468	360.464	1.23992	4.88434	0.069476	94.7123	0.000292	9.16	1.41	0.67	0.22	1.87	7.18501	2.30227	0.994601	0.189296	131.864	13.4664	125.855	26.6248	1.31129	341.636	4.31152	2.44583	0.00156233	0.0560212	0.0272469	1463.03	2.05025	21.5072	479.777	0.0842012	0.161174
particle-associated	N10	ss	52	51.5586	0.44143	TRUE	22/07/2023 11:59	18S	41	78.6586	24.65	11	191	52.1144	-1.42705	34.4815	370.468	360.464	1.23992	4.88434	0.069476	94.7123	0.000292	9.16	1.41	0.67	0.22	1.87	7.18501	2.30227	0.994601	0.189296	131.864	13.4664	125.855	26.6248	1.31129	341.636	4.31152	2.44583	0.00156233	0.0560212	0.0272469	1463.03	2.05025	21.5072	479.777	0.0842012	0.161174
free-living	N10	ss	52	51.5586	0.44143	TRUE	22/07/2023 11:59	18S	41	78.6586	24.65	11	191	52.1144	-1.42705	34.4815	370.468	360.464	1.23992	4.88434	0.069476	94.7123	0.000292	9.16	1.41	0.67	0.22	1.87	7.18501	2.30227	0.994601	0.189296	131.864	13.4664	125.855	26.6248	1.31129	341.636	4.31152	2.44583	0.00156233	0.0560212	0.0272469	1463.03	2.05025	21.5072	479.777	0.0842012	0.161174
particle-associated	N10	fs	52	51.5586	0.44143	TRUE	22/07/2023 11:59	18S	41	78.6586	24.65	11	191	52.1144	-1.42705	34.4815	370.468	360.464	1.23992	4.88434	0.069476	94.7123	0.000292	9.16	1.41	0.67	0.22	1.87	7.18501	2.30227	0.994601	0.189296	131.864	13.4664	125.855	26.6248	1.31129	341.636	4.31152	2.44583	0.00156233	0.0560212	0.0272469	1463.03	2.05025	21.5072	479.777	0.0842012	0.161174
free-living	N10	fs	52	51.5586	0.44143	TRUE	22/07/2023 11:59	18S	41	78.6586	24.65	11	191	52.1144	-1.42705	34.4815	370.468	360.464	1.23992	4.88434	0.069476	94.7123	0.000292	9.16	1.41	0.67	0.22	1.87	7.18501	2.30227	0.994601	0.189296	131.864	13.4664	125.855	26.6248	1.31129	341.636	4.31152	2.44583	0.00156233	0.0560212	0.0272469	1463.03	2.05025	21.5072	479.777	0.0842012	0.161174
particle-associated	N10	fs	52	51.5586	0.44143	TRUE	22/07/2023 11:59	18S	41	78.6586	24.65	11	191	52.1144	-1.42705	34.4815	370.468	360.464	1.23992	4.88434	0.069476	94.7123	0.000292	9.16	1.41	0.67	0.22	1.87	7.18501	2.30227	0.994601	0.189296	131.864	13.4664	125.855	26.6248	1.31129	341.636	4.31152	2.44583	0.00156233	0.0560212	0.0272469	1463.03	2.05025	21.5072	479.777	0.0842012	0.161174
free-living	N10	fs	52	51.5586	0.44143	TRUE	22/07/2023 11:59	18S	41	78.6586	24.65	11	191	52.1144	-1.42705	34.4815	370.468	360.464	1.23992	4.88434	0.069476	94.7123	0.000292	9.16	1.41	0.67	0.22	1.87	7.18501	2.30227	0.994601	0.189296	131.864	13.4664	125.855	26.6248	1.31129	341.636	4.31152	2.44583	0.00156233	0.0560212	0.0272469	1463.03	2.05025	21.5072	479.777	0.0842012	0.161174
particle-associated	N10	fs	52	51.5586	0.44143	TRUE	22/07/2023 11:59	18S	41	78.6586	24.65	11	191	52.1144	-1.42705	34.4815	370.468	360.464	1.23992	4.88434	0.069476	94.7123	0.000292	9.16	1.41	0.67	0.22	1.87	7.18501	2.30227	0.994601	0.189296	131.864	13.4664	125.855	26.6248	1.31129	341.636	4.31152	2.44583	0.00156233	0.0560212	0.0272469	1463.03	2.05025	21.5072	479.777	0.0842012	0.161174
free-living	N10	fs	52	51.5586	0.44143	TRUE	22/07/2023 11:59	18S	41	78.6586	24.65	11	191	52.1144	-1.42705	34.4815	370.468	360.464	1.23992	4.88434	0.069476	94.7123	0.000292	9.16	1.41	0.67	0.22	1.87	7.18501	2.30227	0.994601	0.189296	131.864	13.4664	125.855	26.6248	1.31129	341.636	4.31152	2.44583	0.00156233	0.0560212	0.0272469	1463.03	2.05025	21.5072	479.777	0.0842012	0.161174
particle-associated	N09	susp	66	61.6385	4.3615	TRUE	23/07/2023 12:02	21S	45	79.3833	27.7674	11	239	62.3055	-1.22322	34.3313	366.174	356.336	3.99483	0.727915	0.198998	91.6921	0.000332	9.84	0.31	0.7	0.11	1.8448	7.18501	2.30227	0.994601	0.189296	133.777	11.3405	124.091	26.6248	1.54119	355.22	4.34397	2.593	0.00156233	0.0560212	0.0272469	1463.03	2.05025	21.5072	479.777	0.0842012	0.161174
free-living	N09	susp	66	61.6385	4.3615	TRUE	23/07/2023 12:02	21S	45	79.3833	27.7674	11	239	62.3055	-1.22322	34.3313	366.174	356.336	3.99483	0.727915	0.198998	91.6921	0.000332	9.84	0.31	0.7	0.11	1.8448	7.18501	2.30227	0.994601	0.189296	133.777	11.3405	124.091	26.6248	1.54119	355.22	4.34397	2.593	0.00156233	0.0560212	0.0272469	1463.03	2.05025	21.5072	479.777	0.0842012	0.161174
particle-associated	N09	susp	66	61.6385	4.3615	TRUE	23/07/2023 12:02	21S	45	79.3833	27.7674	11	239	62.3055	-1.22322	34.3313	366.174	356.336	3.99483	0.727915	0.198998	91.6921	0.000332	9.84	0.31	0.7	0.11	1.8448	7.18501	2.30227	0.994601	0.189296	133.777	11.3405	124.091	26.6248	1.54119	355.22	4.34397	2.593	0.00156233	0.0560212	0.0272469	1463.03	2.05025	21.5072	479.777	0.0842012	0.161174
free-living	N09	susp	66	61.6385	4.3615	TRUE	23/07/2023 12:02	21S	45	79.3833	27.7674	11	239	62.3055	-1.22322	34.3313	366.174	356.336	3.99483	0.727915	0.198998	91.6921	0.000332	9.84	0.31	0.7	0.11	1.8448	7.18501	2.30227	0.994601	0.189296	133.777	11.3405	124.091	26.6248	1.54119	355.22	4.34397	2.593	0.00156233	0.0560212	0.0272469	1463.03	2.05025	21.5072	479.777	0.0842012	0.161174
particle-associated	N09	susp	66	61.6385	4.3615	TRUE	23/07/2023 12:02	21S	45	79.3833	27.7674	11	239	62.3055	-1.22322	34.3313	366.174	356.336	3.99483	0.727915	0.198998	91.6921	0.000332	9.84	0.31	0.7	0.11	1.8448	7.18501	2.30227	0.994601	0.189296	133.777	11.3405	124.091	26.6248	1.54119	355.22	4.34397	2.593	0.00156233	0.0560212	0.0272469	1463.03	2.05025	21.5072	479.777	0.0842012	0.161174
free-living	N09	susp	66	61.6385	4.3615	TRUE	23/07/2023 12:02	21S	45	79.3833	27.7674	11	239	62.3055	-1.22322	34.3313	366.174	356.336	3.99483	0.727915	0.198998	91.6921	0.000332	9.84	0.31	0.7	0.11	1.8448	7.18501	2.30227	0.994601	0.189296	133.777	11.3405	124.091	26.6248	1.54119	355.22	4.34397	2.593	0.00156233	0.0560212	0.0272469	1463.03	2.05025	21.5072	479.777	0.0842012	0.161174
particle-associated	N09	ss	66	61.6385	4.3615	TRUE	23/07/2023 12:02	21S	45	79.3833	27.7674	11	239	62.3055	-1.22322	34.3313	366.174	356.336	3.99483	0.727915	0.198998	91.6921	0.000332	9.84	0.31	0.7	0.11	1.8448	7.18501	2.30227	0.994601	0.189296	133.777	11.3405	124.091	26.6248	1.54119	355.22	4.34397	2.593	0.00156233	0.0560212	0.0272469	1463.03	2.05025	21.5072	479.777	0.0842012	0.161174
free-living	N09	ss	66	61.6385	4.3615	TRUE	23/07/2023 12:02	21S	45	79.3833	27.7674	11	239	62.3055	-1.22322	34.3313	366.174	356.336	3.99483	0.727915	0.198998	91.6921	0.000332	9.84	0.31	0.7	0.11	1.8448	7.18501	2.30227	0.994601	0.189296	133.777	11.3405	124.091	26.6248	1.54119	355.22	4.34397	2.593	0.00156233	0.0560212	0.0272469	1463.03	2.05025	21.5072	479.777	0.0842012	0.161174
particle-associated	N09	ss	66	61.6385	4.3615	TRUE	23/07/2023 12:02	21S	45	79.3833	27.7674	11	239	62.3055	-1.22322	34.3313	366.174	356.336	3.99483	0.727915	0.198998	91.6921	0.000332	9.84	0.31	0.7	0.11	1.8448	7.18501	2.30227	0.994601	0.189296	133.777	11.3405	124.091	26.6248	1.54119	355.22	4.34397	2.593	0.00156233	0.0560212	0.0272469	1463.03	2.05025	21.5072	479.777	0.0842012	0.161174
free-living	N09	ss	66	61.6385	4.3615	TRUE	23/07/2023 12:02	21S	45	79.3833	27.7674	11	239	62.3055	-1.22322	34.3313	366.174	356.336	3.99483	0.727915	0.198998	91.6921	0.000332	9.84	0.31	0.7	0.11	1.8448	7.18501	2.30227	0.994601	0.189296	133.777	11.3405	124.091	26.6248	1.54119	355.22	4.34397	2.593	0.00156233	0.0560212	0.0272469	1463.03	2.05025	21.5072	479.777	0.0842012	0.161174
particle-associated	N09	ss	66	61.6385	4.3615	TRUE	23/07/2023 12:02	21S	45	79.3833	27.7674	11	239	62.3055	-1.22322	34.3313	366.174	356.336	3.99483	0.727915	0.198998	91.6921	0.000332	9.84	0.31	0.7	0.11	1.8448	7.18501	2.30227	0.994601	0.189296	133.777	11.3405	124.091	26.6248	1.54119	355.22	4.34397	2.593	0.00156233	0.0560212	0.0272469	1463.03	2.05025	21.5072	479.777	0.0842012	0.161174
free-living	N09	ss	66	61.6385	4.3615	TRUE	23/07/2023 12:02	21S	45	79.3833	27.7674	11	239	62.3055	-1.22322	34.3313	366.174	356.336	3.99483	0.727915	0.198998	91.6921	0.000332	9.84	0.31	0.7	0.11	1.8448	7.18501	2.30227	0.994601	0.189296	133.777	11.3405	124.091	26.6248	1.54119	355.22	4.34397	2.593	0.00156233	0.0560212	0.0272469	1463.03	2.05025	21.5072	479.777	0.0842012	0.161174
particle-associated	N09	fs	66	61.6385	4.3615	TRUE	23/07/2023 12:02	21S	45	79.3833	27.7674	11	239	62.3055	-1.22322	34.3313	366.174	356.336	3.99483	0.727915	0.198998	91.6921	0.000332	9.84	0.31	0.7	0.11	1.8448	7.18501	2.30227	0.994601	0.189296	133.777	11.3405	124.091	26.6248	1.54119	355.22	4.34397	2.593	0.00156233	0.0560212	0.0272469	1463.03	2.05025	21.5072	479.777	0.0842012	0.161174
free-living	N09	fs	66	61.6385	4.3615	TRUE	23/07/2023 12:02	21S	45	79.3833	27.7674	11	239	62.3055	-1.22322	34.3313	366.174	356.336	3.99483	0.727915	0.198998	91.6921	0.000332	9.84	0.31	0.7	0.11	1.8448	7.18501	2.30227	0.994601	0.189296	133.777	11.3405	124.091	26.6248	1.54119	355.22	4.34397	2.593	0.00156233	0.0560212	0.0272469	1463.03	2.05025	21.5072	479.777	0.0842012	0.161174
particle-associated	N09	fs	66	61.6385	4.3615	TRUE	23/07/2023 12:02	21S	45	79.3833	27.7674	11	239	62.3055	-1.22322	34.3313	366.174	356.336	3.99483	0.727915	0.198998	91.6921	0.000332	9.84	0.31	0.7	0.11	1.8448	7.18501	2.30227	0.994601	0.189296	133.777	11.3405	124.091	26.6248	1.54119	355.22	4.34397	2.593	0.00156233	0.0560212	0.0272469	1463.03	2.05025	21.5072	479.777	0.0842012	0.161174
free-living	N09	fs	66	61.6385	4.3615	TRUE	23/07/2023 12:02	21S	45	79.3833	27.7674	11	239	62.3055	-1.22322	34.3313	366.174	356.336	3.99483	0.727915	0.198998	91.6921	0.000332	9.84	0.31	0.7	0.11	1.8448	7.18501	2.30227	0.994601	0.189296	133.777	11.3405	124.091	26.6248	1.54119	355.22	4.34397	2.593	0.00156233	0.0560212	0.0272469	1463.03	2.05025	21.5072	479.777	0.0842012	0.161174
particle-associated	N09	fs	66	61.6385	4.3615	TRUE	23/07/2023 12:02	21S	45	79.3833	27.7674	11	239	62.3055	-1.22322	34.3313	366.174	356.336	3.99483	0.727915	0.198998	91.6921	0.000332	9.84	0.31	0.7	0.11	1.8448	7.18501	2.30227	0.994601	0.189296	133.777	11.3405	124.091	26.6248	1.54119	355.22	4.34397	2.593	0.00156233	0.0560212	0.0272469	1463.03	2.05025	21.5072	479.777	0.0842012	0.161174
free-living	N09	fs	66	61.6385	4.3615	TRUE	23/07/2023 12:02	21S	45	79.3833	27.7674	11	239	62.3055	-1.22322	34.3313	366.174	356.336	3.99483	0.727915	0.198998	91.6921	0.000332	9.84	0.31	0.7	0.11	1.8448	7.18501	2.30227	0.994601	0.189296	133.777	11.3405	124.091	26.6248	1.54119	355.22	4.34397	2.593	0.00156233	0.0560212	0.0272469	1463.03	2.05025	21.5072	479.777	0.0842012	0.161174
particle-associated	N08	susp	56	55.9702	0.02981	TRUE	26/07/2023 19:22	87S	59	79.3927	33.7254	9	381	56.5754	-1.58449	34.405	369.869	359.902	0.701932	0.543702	-0.03563	97.231	0.000195	9.04	3.14	0.67	0.15	1.8592	7.18501	2.30227	0.994601	0.189296	135.69	11.7657	121.739	29.6813	1.68749	328.053	4.39264	2.61403	0.00156233	0.0560212	0.0272469	1463.03	2.05025	21.5072	479.777	0.0842012	0.161174
free-living	N08	susp	56	55.9702	0.02981	TRUE	26/07/2023 19:22	87S	59	79.3927	33.7254	9	381	56.5754	-1.58449	34.405	369.869	359.902	0.701932	0.543702	-0.03563	97.231	0.000195	9.04	3.14	0.67	0.15	1.8592	7.18501	2.30227	0.994601	0.189296	135.69	11.7657	121.739	29.6813	1.68749	328.053	4.39264	2.61403	0.00156233	0.0560212	0.0272469	1463.03	2.05025	21.5072	479.777	0.0842012	0.161174
particle-associated	N08	susp	56	55.9702	0.02981	TRUE	26/07/2023 19:22	87S	59	79.3927	33.7254	9	381	56.5754	-1.58449	34.405	369.869	359.902	0.701932	0.543702	-0.03563	97.231	0.000195	9.04	3.14	0.67	0.15	1.8592	7.18501	2.30227	0.994601	0.189296	135.69	11.7657	121.739	29.6813	1.68749	328.053	4.39264	2.61403	0.00156233	0.0560212	0.0272469	1463.03	2.05025	21.5072	479.777	0.0842012	0.161174
free-living	N08	susp	56	55.9702	0.02981	TRUE	26/07/2023 19:22	87S	59	79.3927	33.7254	9	381	56.5754	-1.58449	34.405	369.869	359.902	0.701932	0.543702	-0.03563	97.231	0.000195	9.04	3.14	0.67	0.15	1.8592	7.18501	2.30227	0.994601	0.189296	135.69	11.7657	121.739	29.6813	1.68749	328.053	4.39264	2.61403	0.00156233	0.0560212	0.0272469	1463.03	2.05025	21.5072	479.777	0.0842012	0.161174
particle-associated	N08	susp	56	55.9702	0.02981	TRUE	26/07/2023 19:22	87S	59	79.3927	33.7254	9	381	56.5754	-1.58449	34.405	369.869	359.902	0.701932	0.543702	-0.03563	97.231	0.000195	9.04	3.14	0.67	0.15	1.8592	7.18501	2.30227	0.994601	0.189296	135.69	11.7657	121.739	29.6813	1.68749	328.053	4.39264	2.61403	0.00156233	0.0560212	0.0272469	1463.03	2.05025	21.5072	479.777	0.0842012	0.161174
free-living	N08	susp	56	55.9702	0.02981	TRUE	26/07/2023 19:22	87S	59	79.3927	33.7254	9	381	56.5754	-1.58449	34.405	369.869	359.902	0.701932	0.543702	-0.03563	97.231	0.000195	9.04	3.14	0.67	0.15	1.8592	7.18501	2.30227	0.994601	0.189296	135.69	11.7657	121.739	29.6813	1.68749	328.053	4.39264	2.61403	0.00156233	0.0560212	0.0272469	1463.03	2.05025	21.5072	479.777	0.0842012	0.161174
particle-associated	N08	ss	56	55.9702	0.02981	TRUE	26/07/2023 19:22	87S	59	79.3927	33.7254	9	381	56.5754	-1.58449	34.405	369.869	359.902	0.701932	0.543702	-0.03563	97.231	0.000195	9.04	3.14	0.67	0.15	1.8592	7.18501	2.30227	0.994601	0.189296	135.69	11.7657	121.739	29.6813	1.68749	328.053	4.39264	2.61403	0.00156233	0.0560212	0.0272469	1463.03	2.05025	21.5072	479.777	0.0842012	0.161174
free-living	N08	ss	56	55.9702	0.02981	TRUE	26/07/2023 19:22	87S	59	79.3927	33.7254	9	381	56.5754	-1.58449	34.405	369.869	359.902	0.701932	0.543702	-0.03563	97.231	0.000195	9.04	3.14	0.67	0.15	1.8592	7.18501	2.30227	0.994601	0.189296	135.69	11.7657	121.739	29.6813	1.68749	328.053	4.39264	2.61403	0.00156233	0.0560212	0.0272469	1463.03	2.05025	21.5072	479.777	0.0842012	0.161174
particle-associated	N08	ss	56	55.9702	0.02981	TRUE	26/07/2023 19:22	87S	59	79.3927	33.7254	9	381	56.5754	-1.58449	34.405	369.869	359.902	0.701932	0.543702	-0.03563	97.231	0.000195	9.04	3.14	0.67	0.15	1.8592	7.18501	2.30227	0.994601	0.189296	135.69	11.7657	121.739	29.6813	1.68749	328.053	4.39264	2.61403	0.00156233	0.0560212	0.0272469	1463.03	2.05025	21.5072	479.777	0.0842012	0.161174
free-living	N08	ss	56	55.9702	0.02981	TRUE	26/07/2023 19:22	87S	59	79.3927	33.7254	9	381	56.5754	-1.58449	34.405	369.869	359.902	0.701932	0.543702	-0.03563	97.231	0.000195	9.04	3.14	0.67	0.15	1.8592	7.18501	2.30227	0.994601	0.189296	135.69	11.7657	121.739	29.6813	1.68749	328.053	4.39264	2.61403	0.00156233	0.0560212	0.0272469	1463.03	2.05025	21.5072	479.777	0.0842012	0.161174
particle-associated	N08	ss	56	55.9702	0.02981	TRUE	26/07/2023 19:22	87S	59	79.3927	33.7254	9	381	56.5754	-1.58449	34.405	369.869	359.902	0.701932	0.543702	-0.03563	97.231	0.000195	9.04	3.14	0.67	0.15	1.8592	7.18501	2.30227	0.994601	0.189296	135.69	11.7657	121.739	29.6813	1.68749	328.053	4.39264	2.61403	0.00156233	0.0560212	0.0272469	1463.03	2.05025	21.5072	479.777	0.0842012	0.161174
free-living	N08	ss	56	55.9702	0.02981	TRUE	26/07/2023 19:22	87S	59	79.3927	33.7254	9	381	56.5754	-1.58449	34.405	369.869	359.902	0.701932	0.543702	-0.03563	97.231	0.000195	9.04	3.14	0.67	0.15	1.8592	7.18501	2.30227	0.994601	0.189296	135.69	11.7657	121.739	29.6813	1.68749	328.053	4.39264	2.61403	0.00156233	0.0560212	0.0272469	1463.03	2.05025	21.5072	479.777	0.0842012	0.161174
particle-associated	N08	fs	56	55.9702	0.02981	TRUE	26/07/2023 19:22	87S	59	79.3927	33.7254	9	381	56.5754	-1.58449	34.405	369.869	359.902	0.701932	0.543702	-0.03563	97.231	0.000195	9.04	3.14	0.67	0.15	1.8592	7.18501	2.30227	0.994601	0.189296	135.69	11.7657	121.739	29.6813	1.68749	328.053	4.39264	2.61403	0.00156233	0.0560212	0.0272469	1463.03	2.05025	21.5072	479.777	0.0842012	0.161174
free-living	N08	fs	56	55.9702	0.02981	TRUE	26/07/2023 19:22	87S	59	79.3927	33.7254	9	381	56.5754	-1.58449	34.405	369.869	359.902	0.701932	0.543702	-0.03563	97.231	0.000195	9.04	3.14	0.67	0.15	1.8592	7.18501	2.30227	0.994601	0.189296	135.69	11.7657	121.739	29.6813	1.68749	328.053	4.39264	2.61403	0.00156233	0.0560212	0.0272469	1463.03	2.05025	21.5072	479.777	0.0842012	0.161174
particle-associated	N08	fs	56	55.9702	0.02981	TRUE	26/07/2023 19:22	87S	59	79.3927	33.7254	9	381	56.5754	-1.58449	34.405	369.869	359.902	0.701932	0.543702	-0.03563	97.231	0.000195	9.04	3.14	0.67	0.15	1.8592	7.18501	2.30227	0.994601	0.189296	135.69	11.7657	121.739	29.6813	1.68749	328.053	4.39264	2.61403	0.00156233	0.0560212	0.0272469	1463.03	2.05025	21.5072	479.777	0.0842012	0.161174
free-living	N08	fs	56	55.9702	0.02981	TRUE	26/07/2023 19:22	87S	59	79.3927	33.7254	9	381	56.5754	-1.58449	34.405	369.869	359.902	0.701932	0.543702	-0.03563	97.231	0.000195	9.04	3.14	0.67	0.15	1.8592	7.18501	2.30227	0.994601	0.189296	135.69	11.7657	121.739	29.6813	1.68749	328.053	4.39264	2.61403	0.00156233	0.0560212	0.0272469	1463.03	2.05025	21.5072	479.777	0.0842012	0.161174
particle-associated	N08	fs	56	55.9702	0.02981	TRUE	26/07/2023 19:22	87S	59	79.3927	33.7254	9	381	56.5754	-1.58449	34.405	369.869	359.902	0.701932	0.543702	-0.03563	97.231	0.000195	9.04	3.14	0.67	0.15	1.8592	7.18501	2.30227	0.994601	0.189296	135.69	11.7657	121.739	29.6813	1.68749	328.053	4.39264	2.61403	0.00156233	0.0560212	0.0272469	1463.03	2.05025	21.5072	479.777	0.0842012	0.161174
free-living	N08	fs	56	55.9702	0.02981	TRUE	26/07/2023 19:22	87S	59	79.3927	33.7254	9	381	56.5754	-1.58449	34.405	369.869	359.902	0.701932	0.543702	-0.03563	97.231	0.000195	9.04	3.14	0.67	0.15	1.8592	7.18501	2.30227	0.994601	0.189296	135.69	11.7657	121.739	29.6813	1.68749	328.053	4.39264	2.61403	0.00156233	0.0560212	0.0272469	1463.03	2.05025	21.5072	479.777	0.0842012	0.161174
particle-associated	N07	susp	53	56.1347	3.13469	TRUE	21/07/2023 12:05	15S	33	78	29.9991	12	168	56.7389	-1.80558	34.4625	369.014	359.051	0.513599	0.306749	-0.092945	98.6343	0.000134	8.7248	2.0401	0.6211	0.176712	1.8532	7.18501	2.30227	0.994601	0.189296	133.299	12.4035	123.503	29.2993	1.45759	341.636	4.31152	2.4248	0.00156233	0.0560212	0.0272469	1463.03	2.05025	21.5072	479.777	0.0842012	0.161174
free-living	N07	susp	53	56.1347	3.13469	TRUE	21/07/2023 12:05	15S	33	78	29.9991	12	168	56.7389	-1.80558	34.4625	369.014	359.051	0.513599	0.306749	-0.092945	98.6343	0.000134	8.7248	2.0401	0.6211	0.176712	1.8532	7.18501	2.30227	0.994601	0.189296	133.299	12.4035	123.503	29.2993	1.45759	341.636	4.31152	2.4248	0.00156233	0.0560212	0.0272469	1463.03	2.05025	21.5072	479.777	0.0842012	0.161174
particle-associated	N07	susp	53	56.1347	3.13469	TRUE	21/07/2023 12:05	15S	33	78	29.9991	12	168	56.7389	-1.80558	34.4625	369.014	359.051	0.513599	0.306749	-0.092945	98.6343	0.000134	8.7248	2.0401	0.6211	0.176712	1.8532	7.18501	2.30227	0.994601	0.189296	133.299	12.4035	123.503	29.2993	1.45759	341.636	4.31152	2.4248	0.00156233	0.0560212	0.0272469	1463.03	2.05025	21.5072	479.777	0.0842012	0.161174
free-living	N07	susp	53	56.1347	3.13469	TRUE	21/07/2023 12:05	15S	33	78	29.9991	12	168	56.7389	-1.80558	34.4625	369.014	359.051	0.513599	0.306749	-0.092945	98.6343	0.000134	8.7248	2.0401	0.6211	0.176712	1.8532	7.18501	2.30227	0.994601	0.189296	133.299	12.4035	123.503	29.2993	1.45759	341.636	4.31152	2.4248	0.00156233	0.0560212	0.0272469	1463.03	2.05025	21.5072	479.777	0.0842012	0.161174
particle-associated	N07	susp	53	56.1347	3.13469	TRUE	21/07/2023 12:05	15S	33	78	29.9991	12	168	56.7389	-1.80558	34.4625	369.014	359.051	0.513599	0.306749	-0.092945	98.6343	0.000134	8.7248	2.0401	0.6211	0.176712	1.8532	7.18501	2.30227	0.994601	0.189296	133.299	12.4035	123.503	29.2993	1.45759	341.636	4.31152	2.4248	0.00156233	0.0560212	0.0272469	1463.03	2.05025	21.5072	479.777	0.0842012	0.161174
free-living	N07	susp	53	56.1347	3.13469	TRUE	21/07/2023 12:05	15S	33	78	29.9991	12	168	56.7389	-1.80558	34.4625	369.014	359.051	0.513599	0.306749	-0.092945	98.6343	0.000134	8.7248	2.0401	0.6211	0.176712	1.8532	7.18501	2.30227	0.994601	0.189296	133.299	12.4035	123.503	29.2993	1.45759	341.636	4.31152	2.4248	0.00156233	0.0560212	0.0272469	1463.03	2.05025	21.5072	479.777	0.0842012	0.161174
particle-associated	N07	ss	53	56.1347	3.13469	TRUE	21/07/2023 12:05	15S	33	78	29.9991	12	168	56.7389	-1.80558	34.4625	369.014	359.051	0.513599	0.306749	-0.092945	98.6343	0.000134	8.7248	2.0401	0.6211	0.176712	1.8532	7.18501	2.30227	0.994601	0.189296	133.299	12.4035	123.503	29.2993	1.45759	341.636	4.31152	2.4248	0.00156233	0.0560212	0.0272469	1463.03	2.05025	21.5072	479.777	0.0842012	0.161174
free-living	N07	ss	53	56.1347	3.13469	TRUE	21/07/2023 12:05	15S	33	78	29.9991	12	168	56.7389	-1.80558	34.4625	369.014	359.051	0.513599	0.306749	-0.092945	98.6343	0.000134	8.7248	2.0401	0.6211	0.176712	1.8532	7.18501	2.30227	0.994601	0.189296	133.299	12.4035	123.503	29.2993	1.45759	341.636	4.31152	2.4248	0.00156233	0.0560212	0.0272469	1463.03	2.05025	21.5072	479.777	0.0842012	0.161174
particle-associated	N07	ss	53	56.1347	3.13469	TRUE	21/07/2023 12:05	15S	33	78	29.9991	12	168	56.7389	-1.80558	34.4625	369.014	359.051	0.513599	0.306749	-0.092945	98.6343	0.000134	8.7248	2.0401	0.6211	0.176712	1.8532	7.18501	2.30227	0.994601	0.189296	133.299	12.4035	123.503	29.2993	1.45759	341.636	4.31152	2.4248	0.00156233	0.0560212	0.0272469	1463.03	2.05025	21.5072	479.777	0.0842012	0.161174
free-living	N07	ss	53	56.1347	3.13469	TRUE	21/07/2023 12:05	15S	33	78	29.9991	12	168	56.7389	-1.80558	34.4625	369.014	359.051	0.513599	0.306749	-0.092945	98.6343	0.000134	8.7248	2.0401	0.6211	0.176712	1.8532	7.18501	2.30227	0.994601	0.189296	133.299	12.4035	123.503	29.2993	1.45759	341.636	4.31152	2.4248	0.00156233	0.0560212	0.0272469	1463.03	2.05025	21.5072	479.777	0.0842012	0.161174
particle-associated	N07	ss	53	56.1347	3.13469	TRUE	21/07/2023 12:05	15S	33	78	29.9991	12	168	56.7389	-1.80558	34.4625	369.014	359.051	0.513599	0.306749	-0.092945	98.6343	0.000134	8.7248	2.0401	0.6211	0.176712	1.8532	7.18501	2.30227	0.994601	0.189296	133.299	12.4035	123.503	29.2993	1.45759	341.636	4.31152	2.4248	0.00156233	0.0560212	0.0272469	1463.03	2.05025	21.5072	479.777	0.0842012	0.161174
free-living	N07	ss	53	56.1347	3.13469	TRUE	21/07/2023 12:05	15S	33	78	29.9991	12	168	56.7389	-1.80558	34.4625	369.014	359.051	0.513599	0.306749	-0.092945	98.6343	0.000134	8.7248	2.0401	0.6211	0.176712	1.8532	7.18501	2.30227	0.994601	0.189296	133.299	12.4035	123.503	29.2993	1.45759	341.636	4.31152	2.4248	0.00156233	0.0560212	0.0272469	1463.03	2.05025	21.5072	479.777	0.0842012	0.161174
particle-associated	N07	fs	53	56.1347	3.13469	TRUE	21/07/2023 12:05	15S	33	78	29.9991	12	168	56.7389	-1.80558	34.4625	369.014	359.051	0.513599	0.306749	-0.092945	98.6343	0.000134	8.7248	2.0401	0.6211	0.176712	1.8532	7.18501	2.30227	0.994601	0.189296	133.299	12.4035	123.503	29.2993	1.45759	341.636	4.31152	2.4248	0.00156233	0.0560212	0.0272469	1463.03	2.05025	21.5072	479.777	0.0842012	0.161174
free-living	N07	fs	53	56.1347	3.13469	TRUE	21/07/2023 12:05	15S	33	78	29.9991	12	168	56.7389	-1.80558	34.4625	369.014	359.051	0.513599	0.306749	-0.092945	98.6343	0.000134	8.7248	2.0401	0.6211	0.176712	1.8532	7.18501	2.30227	0.994601	0.189296	133.299	12.4035	123.503	29.2993	1.45759	341.636	4.31152	2.4248	0.00156233	0.0560212	0.0272469	1463.03	2.05025	21.5072	479.777	0.0842012	0.161174
particle-associated	N07	fs	53	56.1347	3.13469	TRUE	21/07/2023 12:05	15S	33	78	29.9991	12	168	56.7389	-1.80558	34.4625	369.014	359.051	0.513599	0.306749	-0.092945	98.6343	0.000134	8.7248	2.0401	0.6211	0.176712	1.8532	7.18501	2.30227	0.994601	0.189296	133.299	12.4035	123.503	29.2993	1.45759	341.636	4.31152	2.4248	0.00156233	0.0560212	0.0272469	1463.03	2.05025	21.5072	479.777	0.0842012	0.161174
free-living	N07	fs	53	56.1347	3.13469	TRUE	21/07/2023 12:05	15S	33	78	29.9991	12	168	56.7389	-1.80558	34.4625	369.014	359.051	0.513599	0.306749	-0.092945	98.6343	0.000134	8.7248	2.0401	0.6211	0.176712	1.8532	7.18501	2.30227	0.994601	0.189296	133.299	12.4035	123.503	29.2993	1.45759	341.636	4.31152	2.4248	0.00156233	0.0560212	0.0272469	1463.03	2.05025	21.5072	479.777	0.0842012	0.161174
particle-associated	N07	fs	53	56.1347	3.13469	TRUE	21/07/2023 12:05	15S	33	78	29.9991	12	168	56.7389	-1.80558	34.4625	369.014	359.051	0.513599	0.306749	-0.092945	98.6343	0.000134	8.7248	2.0401	0.6211	0.176712	1.8532	7.18501	2.30227	0.994601	0.189296	133.299	12.4035	123.503	29.2993	1.45759	341.636	4.31152	2.4248	0.00156233	0.0560212	0.0272469	1463.03	2.05025	21.5072	479.777	0.0842012	0.161174
free-living	N07	fs	53	56.1347	3.13469	TRUE	21/07/2023 12:05	15S	33	78	29.9991	12	168	56.7389	-1.80558	34.4625	369.014	359.051	0.513599	0.306749	-0.092945	98.6343	0.000134	8.7248	2.0401	0.6211	0.176712	1.8532	7.18501	2.30227	0.994601	0.189296	133.299	12.4035	123.503	29.2993	1.45759	341.636	4.31152	2.4248	0.00156233	0.0560212	0.0272469	1463.03	2.05025	21.5072	479.777	0.0842012	0.161174
particle-associated	N06	susp	36	36.0102	0.01019	TRUE	30/07/2023 12:05	108S	70	76	29.9995	12	432	36.3931	3.82911	34.8186	356.249	346.658	0.306191	1.17198	-0.091771	98.6052	0.000162	7.7724	2.1016	0.4539	0.170353	1.8328	7.18501	2.30227	0.994601	0.189296	127.081	15.1672	126.443	28.1531	1.49939	237.498	4.29529	2.23558	0.00156233	0.0560212	0.0272469	1463.03	2.05025	21.5072	479.777	0.0842012	0.161174
free-living	N06	susp	36	36.0102	0.01019	TRUE	30/07/2023 12:05	108S	70	76	29.9995	12	432	36.3931	3.82911	34.8186	356.249	346.658	0.306191	1.17198	-0.091771	98.6052	0.000162	7.7724	2.1016	0.4539	0.170353	1.8328	7.18501	2.30227	0.994601	0.189296	127.081	15.1672	126.443	28.1531	1.49939	237.498	4.29529	2.23558	0.00156233	0.0560212	0.0272469	1463.03	2.05025	21.5072	479.777	0.0842012	0.161174
particle-associated	N06	susp	36	36.0102	0.01019	TRUE	30/07/2023 12:05	108S	70	76	29.9995	12	432	36.3931	3.82911	34.8186	356.249	346.658	0.306191	1.17198	-0.091771	98.6052	0.000162	7.7724	2.1016	0.4539	0.170353	1.8328	7.18501	2.30227	0.994601	0.189296	127.081	15.1672	126.443	28.1531	1.49939	237.498	4.29529	2.23558	0.00156233	0.0560212	0.0272469	1463.03	2.05025	21.5072	479.777	0.0842012	0.161174
free-living	N06	susp	36	36.0102	0.01019	TRUE	30/07/2023 12:05	108S	70	76	29.9995	12	432	36.3931	3.82911	34.8186	356.249	346.658	0.306191	1.17198	-0.091771	98.6052	0.000162	7.7724	2.1016	0.4539	0.170353	1.8328	7.18501	2.30227	0.994601	0.189296	127.081	15.1672	126.443	28.1531	1.49939	237.498	4.29529	2.23558	0.00156233	0.0560212	0.0272469	1463.03	2.05025	21.5072	479.777	0.0842012	0.161174
particle-associated	N06	susp	36	36.0102	0.01019	TRUE	30/07/2023 12:05	108S	70	76	29.9995	12	432	36.3931	3.82911	34.8186	356.249	346.658	0.306191	1.17198	-0.091771	98.6052	0.000162	7.7724	2.1016	0.4539	0.170353	1.8328	7.18501	2.30227	0.994601	0.189296	127.081	15.1672	126.443	28.1531	1.49939	237.498	4.29529	2.23558	0.00156233	0.0560212	0.0272469	1463.03	2.05025	21.5072	479.777	0.0842012	0.161174
free-living	N06	susp	36	36.0102	0.01019	TRUE	30/07/2023 12:05	108S	70	76	29.9995	12	432	36.3931	3.82911	34.8186	356.249	346.658	0.306191	1.17198	-0.091771	98.6052	0.000162	7.7724	2.1016	0.4539	0.170353	1.8328	7.18501	2.30227	0.994601	0.189296	127.081	15.1672	126.443	28.1531	1.49939	237.498	4.29529	2.23558	0.00156233	0.0560212	0.0272469	1463.03	2.05025	21.5072	479.777	0.0842012	0.161174
particle-associated	N06	ss	36	36.0102	0.01019	TRUE	30/07/2023 12:05	108S	70	76	29.9995	12	432	36.3931	3.82911	34.8186	356.249	346.658	0.306191	1.17198	-0.091771	98.6052	0.000162	7.7724	2.1016	0.4539	0.170353	1.8328	7.18501	2.30227	0.994601	0.189296	127.081	15.1672	126.443	28.1531	1.49939	237.498	4.29529	2.23558	0.00156233	0.0560212	0.0272469	1463.03	2.05025	21.5072	479.777	0.0842012	0.161174
free-living	N06	ss	36	36.0102	0.01019	TRUE	30/07/2023 12:05	108S	70	76	29.9995	12	432	36.3931	3.82911	34.8186	356.249	346.658	0.306191	1.17198	-0.091771	98.6052	0.000162	7.7724	2.1016	0.4539	0.170353	1.8328	7.18501	2.30227	0.994601	0.189296	127.081	15.1672	126.443	28.1531	1.49939	237.498	4.29529	2.23558	0.00156233	0.0560212	0.0272469	1463.03	2.05025	21.5072	479.777	0.0842012	0.161174
particle-associated	N06	ss	36	36.0102	0.01019	TRUE	30/07/2023 12:05	108S	70	76	29.9995	12	432	36.3931	3.82911	34.8186	356.249	346.658	0.306191	1.17198	-0.091771	98.6052	0.000162	7.7724	2.1016	0.4539	0.170353	1.8328	7.18501	2.30227	0.994601	0.189296	127.081	15.1672	126.443	28.1531	1.49939	237.498	4.29529	2.23558	0.00156233	0.0560212	0.0272469	1463.03	2.05025	21.5072	479.777	0.0842012	0.161174
free-living	N06	ss	36	36.0102	0.01019	TRUE	30/07/2023 12:05	108S	70	76	29.9995	12	432	36.3931	3.82911	34.8186	356.249	346.658	0.306191	1.17198	-0.091771	98.6052	0.000162	7.7724	2.1016	0.4539	0.170353	1.8328	7.18501	2.30227	0.994601	0.189296	127.081	15.1672	126.443	28.1531	1.49939	237.498	4.29529	2.23558	0.00156233	0.0560212	0.0272469	1463.03	2.05025	21.5072	479.777	0.0842012	0.161174
particle-associated	N06	ss	36	36.0102	0.01019	TRUE	30/07/2023 12:05	108S	70	76	29.9995	12	432	36.3931	3.82911	34.8186	356.249	346.658	0.306191	1.17198	-0.091771	98.6052	0.000162	7.7724	2.1016	0.4539	0.170353	1.8328	7.18501	2.30227	0.994601	0.189296	127.081	15.1672	126.443	28.1531	1.49939	237.498	4.29529	2.23558	0.00156233	0.0560212	0.0272469	1463.03	2.05025	21.5072	479.777	0.0842012	0.161174
free-living	N06	ss	36	36.0102	0.01019	TRUE	30/07/2023 12:05	108S	70	76	29.9995	12	432	36.3931	3.82911	34.8186	356.249	346.658	0.306191	1.17198	-0.091771	98.6052	0.000162	7.7724	2.1016	0.4539	0.170353	1.8328	7.18501	2.30227	0.994601	0.189296	127.081	15.1672	126.443	28.1531	1.49939	237.498	4.29529	2.23558	0.00156233	0.0560212	0.0272469	1463.03	2.05025	21.5072	479.777	0.0842012	0.161174
particle-associated	N06	fs	36	36.0102	0.01019	TRUE	30/07/2023 12:05	108S	70	76	29.9995	12	432	36.3931	3.82911	34.8186	356.249	346.658	0.306191	1.17198	-0.091771	98.6052	0.000162	7.7724	2.1016	0.4539	0.170353	1.8328	7.18501	2.30227	0.994601	0.189296	127.081	15.1672	126.443	28.1531	1.49939	237.498	4.29529	2.23558	0.00156233	0.0560212	0.0272469	1463.03	2.05025	21.5072	479.777	0.0842012	0.161174
free-living	N06	fs	36	36.0102	0.01019	TRUE	30/07/2023 12:05	108S	70	76	29.9995	12	432	36.3931	3.82911	34.8186	356.249	346.658	0.306191	1.17198	-0.091771	98.6052	0.000162	7.7724	2.1016	0.4539	0.170353	1.8328	7.18501	2.30227	0.994601	0.189296	127.081	15.1672	126.443	28.1531	1.49939	237.498	4.29529	2.23558	0.00156233	0.0560212	0.0272469	1463.03	2.05025	21.5072	479.777	0.0842012	0.161174
particle-associated	N06	fs	36	36.0102	0.01019	TRUE	30/07/2023 12:05	108S	70	76	29.9995	12	432	36.3931	3.82911	34.8186	356.249	346.658	0.306191	1.17198	-0.091771	98.6052	0.000162	7.7724	2.1016	0.4539	0.170353	1.8328	7.18501	2.30227	0.994601	0.189296	127.081	15.1672	126.443	28.1531	1.49939	237.498	4.29529	2.23558	0.00156233	0.0560212	0.0272469	1463.03	2.05025	21.5072	479.777	0.0842012	0.161174
free-living	N06	fs	36	36.0102	0.01019	TRUE	30/07/2023 12:05	108S	70	76	29.9995	12	432	36.3931	3.82911	34.8186	356.249	346.658	0.306191	1.17198	-0.091771	98.6052	0.000162	7.7724	2.1016	0.4539	0.170353	1.8328	7.18501	2.30227	0.994601	0.189296	127.081	15.1672	126.443	28.1531	1.49939	237.498	4.29529	2.23558	0.00156233	0.0560212	0.0272469	1463.03	2.05025	21.5072	479.777	0.0842012	0.161174
particle-associated	N06	fs	36	36.0102	0.01019	TRUE	30/07/2023 12:05	108S	70	76	29.9995	12	432	36.3931	3.82911	34.8186	356.249	346.658	0.306191	1.17198	-0.091771	98.6052	0.000162	7.7724	2.1016	0.4539	0.170353	1.8328	7.18501	2.30227	0.994601	0.189296	127.081	15.1672	126.443	28.1531	1.49939	237.498	4.29529	2.23558	0.00156233	0.0560212	0.0272469	1463.03	2.05025	21.5072	479.777	0.0842012	0.161174
free-living	N06	fs	36	36.0102	0.01019	TRUE	30/07/2023 12:05	108S	70	76	29.9995	12	432	36.3931	3.82911	34.8186	356.249	346.658	0.306191	1.17198	-0.091771	98.6052	0.000162	7.7724	2.1016	0.4539	0.170353	1.8328	7.18501	2.30227	0.994601	0.189296	127.081	15.1672	126.443	28.1531	1.49939	237.498	4.29529	2.23558	0.00156233	0.0560212	0.0272469	1463.03	2.05025	21.5072	479.777	0.0842012	0.161174
particle-associated	N05	susp	22	21.2218	0.778198	TRUE	19/07/2023 16:09	10T	24	74.6058	27.8998	21	93	21.4453	7.64445	34.9903	307.397	299.209	1.49349	0.226203	0.617746	85.6946	0.003393	6.274	2.0557	0.4991	0.17538	1.7764	7.18501	2.30227	0.994601	0.189296	118.471	18.9939	155.258	10.5777	0.558896	205.804	3.63012	1.89918	0.00156233	0.0560212	0.0272469	1463.03	2.05025	21.5072	479.777	0.0842012	0.161174
free-living	N05	susp	22	21.2218	0.778198	TRUE	19/07/2023 16:09	10T	24	74.6058	27.8998	21	93	21.4453	7.64445	34.9903	307.397	299.209	1.49349	0.226203	0.617746	85.6946	0.003393	6.274	2.0557	0.4991	0.17538	1.7764	7.18501	2.30227	0.994601	0.189296	118.471	18.9939	155.258	10.5777	0.558896	205.804	3.63012	1.89918	0.00156233	0.0560212	0.0272469	1463.03	2.05025	21.5072	479.777	0.0842012	0.161174
particle-associated	N05	susp	22	21.2218	0.778198	TRUE	19/07/2023 16:09	10T	24	74.6058	27.8998	21	93	21.4453	7.64445	34.9903	307.397	299.209	1.49349	0.226203	0.617746	85.6946	0.003393	6.274	2.0557	0.4991	0.17538	1.7764	7.18501	2.30227	0.994601	0.189296	118.471	18.9939	155.258	10.5777	0.558896	205.804	3.63012	1.89918	0.00156233	0.0560212	0.0272469	1463.03	2.05025	21.5072	479.777	0.0842012	0.161174
free-living	N05	susp	22	21.2218	0.778198	TRUE	19/07/2023 16:09	10T	24	74.6058	27.8998	21	93	21.4453	7.64445	34.9903	307.397	299.209	1.49349	0.226203	0.617746	85.6946	0.003393	6.274	2.0557	0.4991	0.17538	1.7764	7.18501	2.30227	0.994601	0.189296	118.471	18.9939	155.258	10.5777	0.558896	205.804	3.63012	1.89918	0.00156233	0.0560212	0.0272469	1463.03	2.05025	21.5072	479.777	0.0842012	0.161174
particle-associated	N05	susp	22	21.2218	0.778198	TRUE	19/07/2023 16:09	10T	24	74.6058	27.8998	21	93	21.4453	7.64445	34.9903	307.397	299.209	1.49349	0.226203	0.617746	85.6946	0.003393	6.274	2.0557	0.4991	0.17538	1.7764	7.18501	2.30227	0.994601	0.189296	118.471	18.9939	155.258	10.5777	0.558896	205.804	3.63012	1.89918	0.00156233	0.0560212	0.0272469	1463.03	2.05025	21.5072	479.777	0.0842012	0.161174
free-living	N05	susp	22	21.2218	0.778198	TRUE	19/07/2023 16:09	10T	24	74.6058	27.8998	21	93	21.4453	7.64445	34.9903	307.397	299.209	1.49349	0.226203	0.617746	85.6946	0.003393	6.274	2.0557	0.4991	0.17538	1.7764	7.18501	2.30227	0.994601	0.189296	118.471	18.9939	155.258	10.5777	0.558896	205.804	3.63012	1.89918	0.00156233	0.0560212	0.0272469	1463.03	2.05025	21.5072	479.777	0.0842012	0.161174
particle-associated	N05	ss	22	21.2218	0.778198	TRUE	19/07/2023 16:09	10T	24	74.6058	27.8998	21	93	21.4453	7.64445	34.9903	307.397	299.209	1.49349	0.226203	0.617746	85.6946	0.003393	6.274	2.0557	0.4991	0.17538	1.7764	7.18501	2.30227	0.994601	0.189296	118.471	18.9939	155.258	10.5777	0.558896	205.804	3.63012	1.89918	0.00156233	0.0560212	0.0272469	1463.03	2.05025	21.5072	479.777	0.0842012	0.161174
free-living	N05	ss	22	21.2218	0.778198	TRUE	19/07/2023 16:09	10T	24	74.6058	27.8998	21	93	21.4453	7.64445	34.9903	307.397	299.209	1.49349	0.226203	0.617746	85.6946	0.003393	6.274	2.0557	0.4991	0.17538	1.7764	7.18501	2.30227	0.994601	0.189296	118.471	18.9939	155.258	10.5777	0.558896	205.804	3.63012	1.89918	0.00156233	0.0560212	0.0272469	1463.03	2.05025	21.5072	479.777	0.0842012	0.161174
particle-associated	N05	ss	22	21.2218	0.778198	TRUE	19/07/2023 16:09	10T	24	74.6058	27.8998	21	93	21.4453	7.64445	34.9903	307.397	299.209	1.49349	0.226203	0.617746	85.6946	0.003393	6.274	2.0557	0.4991	0.17538	1.7764	7.18501	2.30227	0.994601	0.189296	118.471	18.9939	155.258	10.5777	0.558896	205.804	3.63012	1.89918	0.00156233	0.0560212	0.0272469	1463.03	2.05025	21.5072	479.777	0.0842012	0.161174
free-living	N05	ss	22	21.2218	0.778198	TRUE	19/07/2023 16:09	10T	24	74.6058	27.8998	21	93	21.4453	7.64445	34.9903	307.397	299.209	1.49349	0.226203	0.617746	85.6946	0.003393	6.274	2.0557	0.4991	0.17538	1.7764	7.18501	2.30227	0.994601	0.189296	118.471	18.9939	155.258	10.5777	0.558896	205.804	3.63012	1.89918	0.00156233	0.0560212	0.0272469	1463.03	2.05025	21.5072	479.777	0.0842012	0.161174
particle-associated	N05	ss	22	21.2218	0.778198	TRUE	19/07/2023 16:09	10T	24	74.6058	27.8998	21	93	21.4453	7.64445	34.9903	307.397	299.209	1.49349	0.226203	0.617746	85.6946	0.003393	6.274	2.0557	0.4991	0.17538	1.7764	7.18501	2.30227	0.994601	0.189296	118.471	18.9939	155.258	10.5777	0.558896	205.804	3.63012	1.89918	0.00156233	0.0560212	0.0272469	1463.03	2.05025	21.5072	479.777	0.0842012	0.161174
free-living	N05	ss	22	21.2218	0.778198	TRUE	19/07/2023 16:09	10T	24	74.6058	27.8998	21	93	21.4453	7.64445	34.9903	307.397	299.209	1.49349	0.226203	0.617746	85.6946	0.003393	6.274	2.0557	0.4991	0.17538	1.7764	7.18501	2.30227	0.994601	0.189296	118.471	18.9939	155.258	10.5777	0.558896	205.804	3.63012	1.89918	0.00156233	0.0560212	0.0272469	1463.03	2.05025	21.5072	479.777	0.0842012	0.161174
particle-associated	N05	fs	22	21.2218	0.778198	TRUE	19/07/2023 16:09	10T	24	74.6058	27.8998	21	93	21.4453	7.64445	34.9903	307.397	299.209	1.49349	0.226203	0.617746	85.6946	0.003393	6.274	2.0557	0.4991	0.17538	1.7764	7.18501	2.30227	0.994601	0.189296	118.471	18.9939	155.258	10.5777	0.558896	205.804	3.63012	1.89918	0.00156233	0.0560212	0.0272469	1463.03	2.05025	21.5072	479.777	0.0842012	0.161174
free-living	N05	fs	22	21.2218	0.778198	TRUE	19/07/2023 16:09	10T	24	74.6058	27.8998	21	93	21.4453	7.64445	34.9903	307.397	299.209	1.49349	0.226203	0.617746	85.6946	0.003393	6.274	2.0557	0.4991	0.17538	1.7764	7.18501	2.30227	0.994601	0.189296	118.471	18.9939	155.258	10.5777	0.558896	205.804	3.63012	1.89918	0.00156233	0.0560212	0.0272469	1463.03	2.05025	21.5072	479.777	0.0842012	0.161174
particle-associated	N05	fs	22	21.2218	0.778198	TRUE	19/07/2023 16:09	10T	24	74.6058	27.8998	21	93	21.4453	7.64445	34.9903	307.397	299.209	1.49349	0.226203	0.617746	85.6946	0.003393	6.274	2.0557	0.4991	0.17538	1.7764	7.18501	2.30227	0.994601	0.189296	118.471	18.9939	155.258	10.5777	0.558896	205.804	3.63012	1.89918	0.00156233	0.0560212	0.0272469	1463.03	2.05025	21.5072	479.777	0.0842012	0.161174
free-living	N05	fs	22	21.2218	0.778198	TRUE	19/07/2023 16:09	10T	24	74.6058	27.8998	21	93	21.4453	7.64445	34.9903	307.397	299.209	1.49349	0.226203	0.617746	85.6946	0.003393	6.274	2.0557	0.4991	0.17538	1.7764	7.18501	2.30227	0.994601	0.189296	118.471	18.9939	155.258	10.5777	0.558896	205.804	3.63012	1.89918	0.00156233	0.0560212	0.0272469	1463.03	2.05025	21.5072	479.777	0.0842012	0.161174
particle-associated	N05	fs	22	21.2218	0.778198	TRUE	19/07/2023 16:09	10T	24	74.6058	27.8998	21	93	21.4453	7.64445	34.9903	307.397	299.209	1.49349	0.226203	0.617746	85.6946	0.003393	6.274	2.0557	0.4991	0.17538	1.7764	7.18501	2.30227	0.994601	0.189296	118.471	18.9939	155.258	10.5777	0.558896	205.804	3.63012	1.89918	0.00156233	0.0560212	0.0272469	1463.03	2.05025	21.5072	479.777	0.0842012	0.161174
free-living	N05	fs	22	21.2218	0.778198	TRUE	19/07/2023 16:09	10T	24	74.6058	27.8998	21	93	21.4453	7.64445	34.9903	307.397	299.209	1.49349	0.226203	0.617746	85.6946	0.003393	6.274	2.0557	0.4991	0.17538	1.7764	7.18501	2.30227	0.994601	0.189296	118.471	18.9939	155.258	10.5777	0.558896	205.804	3.63012	1.89918	0.00156233	0.0560212	0.0272469	1463.03	2.05025	21.5072	479.777	0.0842012	0.161174
particle-associated	N13	susp	35	31.6005	3.39946	TRUE	01/08/2023 12:07	112S	76	76.3333	19.9989	12	480	31.9366	6.40053	34.9874	332.302	323.412	0.750737	2.43802	-0.011024	96.6347	0.000361	8.2996	1.878	0.4255	0.175308	1.8184	7.18501	2.30227	0.994601	0.189296	125.646	14.5294	128.795	28.9172	1.58299	251.081	4.18173	2.21455	0.00156233	0.0560212	0.0272469	1463.03	2.05025	21.5072	479.777	0.0842012	0.161174
free-living	N13	susp	35	31.6005	3.39946	TRUE	01/08/2023 12:07	112S	76	76.3333	19.9989	12	480	31.9366	6.40053	34.9874	332.302	323.412	0.750737	2.43802	-0.011024	96.6347	0.000361	8.2996	1.878	0.4255	0.175308	1.8184	7.18501	2.30227	0.994601	0.189296	125.646	14.5294	128.795	28.9172	1.58299	251.081	4.18173	2.21455	0.00156233	0.0560212	0.0272469	1463.03	2.05025	21.5072	479.777	0.0842012	0.161174
particle-associated	N13	susp	35	31.6005	3.39946	TRUE	01/08/2023 12:07	112S	76	76.3333	19.9989	12	480	31.9366	6.40053	34.9874	332.302	323.412	0.750737	2.43802	-0.011024	96.6347	0.000361	8.2996	1.878	0.4255	0.175308	1.8184	7.18501	2.30227	0.994601	0.189296	125.646	14.5294	128.795	28.9172	1.58299	251.081	4.18173	2.21455	0.00156233	0.0560212	0.0272469	1463.03	2.05025	21.5072	479.777	0.0842012	0.161174
free-living	N13	susp	35	31.6005	3.39946	TRUE	01/08/2023 12:07	112S	76	76.3333	19.9989	12	480	31.9366	6.40053	34.9874	332.302	323.412	0.750737	2.43802	-0.011024	96.6347	0.000361	8.2996	1.878	0.4255	0.175308	1.8184	7.18501	2.30227	0.994601	0.189296	125.646	14.5294	128.795	28.9172	1.58299	251.081	4.18173	2.21455	0.00156233	0.0560212	0.0272469	1463.03	2.05025	21.5072	479.777	0.0842012	0.161174
particle-associated	N13	susp	35	31.6005	3.39946	TRUE	01/08/2023 12:07	112S	76	76.3333	19.9989	12	480	31.9366	6.40053	34.9874	332.302	323.412	0.750737	2.43802	-0.011024	96.6347	0.000361	8.2996	1.878	0.4255	0.175308	1.8184	7.18501	2.30227	0.994601	0.189296	125.646	14.5294	128.795	28.9172	1.58299	251.081	4.18173	2.21455	0.00156233	0.0560212	0.0272469	1463.03	2.05025	21.5072	479.777	0.0842012	0.161174
free-living	N13	susp	35	31.6005	3.39946	TRUE	01/08/2023 12:07	112S	76	76.3333	19.9989	12	480	31.9366	6.40053	34.9874	332.302	323.412	0.750737	2.43802	-0.011024	96.6347	0.000361	8.2996	1.878	0.4255	0.175308	1.8184	7.18501	2.30227	0.994601	0.189296	125.646	14.5294	128.795	28.9172	1.58299	251.081	4.18173	2.21455	0.00156233	0.0560212	0.0272469	1463.03	2.05025	21.5072	479.777	0.0842012	0.161174
particle-associated	N13	ss	35	31.6005	3.39946	TRUE	01/08/2023 12:07	112S	76	76.3333	19.9989	12	480	31.9366	6.40053	34.9874	332.302	323.412	0.750737	2.43802	-0.011024	96.6347	0.000361	8.2996	1.878	0.4255	0.175308	1.8184	7.18501	2.30227	0.994601	0.189296	125.646	14.5294	128.795	28.9172	1.58299	251.081	4.18173	2.21455	0.00156233	0.0560212	0.0272469	1463.03	2.05025	21.5072	479.777	0.0842012	0.161174
free-living	N13	ss	35	31.6005	3.39946	TRUE	01/08/2023 12:07	112S	76	76.3333	19.9989	12	480	31.9366	6.40053	34.9874	332.302	323.412	0.750737	2.43802	-0.011024	96.6347	0.000361	8.2996	1.878	0.4255	0.175308	1.8184	7.18501	2.30227	0.994601	0.189296	125.646	14.5294	128.795	28.9172	1.58299	251.081	4.18173	2.21455	0.00156233	0.0560212	0.0272469	1463.03	2.05025	21.5072	479.777	0.0842012	0.161174
particle-associated	N13	ss	35	31.6005	3.39946	TRUE	01/08/2023 12:07	112S	76	76.3333	19.9989	12	480	31.9366	6.40053	34.9874	332.302	323.412	0.750737	2.43802	-0.011024	96.6347	0.000361	8.2996	1.878	0.4255	0.175308	1.8184	7.18501	2.30227	0.994601	0.189296	125.646	14.5294	128.795	28.9172	1.58299	251.081	4.18173	2.21455	0.00156233	0.0560212	0.0272469	1463.03	2.05025	21.5072	479.777	0.0842012	0.161174
free-living	N13	ss	35	31.6005	3.39946	TRUE	01/08/2023 12:07	112S	76	76.3333	19.9989	12	480	31.9366	6.40053	34.9874	332.302	323.412	0.750737	2.43802	-0.011024	96.6347	0.000361	8.2996	1.878	0.4255	0.175308	1.8184	7.18501	2.30227	0.994601	0.189296	125.646	14.5294	128.795	28.9172	1.58299	251.081	4.18173	2.21455	0.00156233	0.0560212	0.0272469	1463.03	2.05025	21.5072	479.777	0.0842012	0.161174
particle-associated	N13	ss	35	31.6005	3.39946	TRUE	01/08/2023 12:07	112S	76	76.3333	19.9989	12	480	31.9366	6.40053	34.9874	332.302	323.412	0.750737	2.43802	-0.011024	96.6347	0.000361	8.2996	1.878	0.4255	0.175308	1.8184	7.18501	2.30227	0.994601	0.189296	125.646	14.5294	128.795	28.9172	1.58299	251.081	4.18173	2.21455	0.00156233	0.0560212	0.0272469	1463.03	2.05025	21.5072	479.777	0.0842012	0.161174
free-living	N13	ss	35	31.6005	3.39946	TRUE	01/08/2023 12:07	112S	76	76.3333	19.9989	12	480	31.9366	6.40053	34.9874	332.302	323.412	0.750737	2.43802	-0.011024	96.6347	0.000361	8.2996	1.878	0.4255	0.175308	1.8184	7.18501	2.30227	0.994601	0.189296	125.646	14.5294	128.795	28.9172	1.58299	251.081	4.18173	2.21455	0.00156233	0.0560212	0.0272469	1463.03	2.05025	21.5072	479.777	0.0842012	0.161174
particle-associated	N13	fs	35	31.6005	3.39946	TRUE	01/08/2023 12:07	112S	76	76.3333	19.9989	12	480	31.9366	6.40053	34.9874	332.302	323.412	0.750737	2.43802	-0.011024	96.6347	0.000361	8.2996	1.878	0.4255	0.175308	1.8184	7.18501	2.30227	0.994601	0.189296	125.646	14.5294	128.795	28.9172	1.58299	251.081	4.18173	2.21455	0.00156233	0.0560212	0.0272469	1463.03	2.05025	21.5072	479.777	0.0842012	0.161174
free-living	N13	fs	35	31.6005	3.39946	TRUE	01/08/2023 12:07	112S	76	76.3333	19.9989	12	480	31.9366	6.40053	34.9874	332.302	323.412	0.750737	2.43802	-0.011024	96.6347	0.000361	8.2996	1.878	0.4255	0.175308	1.8184	7.18501	2.30227	0.994601	0.189296	125.646	14.5294	128.795	28.9172	1.58299	251.081	4.18173	2.21455	0.00156233	0.0560212	0.0272469	1463.03	2.05025	21.5072	479.777	0.0842012	0.161174
particle-associated	N13	fs	35	31.6005	3.39946	TRUE	01/08/2023 12:07	112S	76	76.3333	19.9989	12	480	31.9366	6.40053	34.9874	332.302	323.412	0.750737	2.43802	-0.011024	96.6347	0.000361	8.2996	1.878	0.4255	0.175308	1.8184	7.18501	2.30227	0.994601	0.189296	125.646	14.5294	128.795	28.9172	1.58299	251.081	4.18173	2.21455	0.00156233	0.0560212	0.0272469	1463.03	2.05025	21.5072	479.777	0.0842012	0.161174
free-living	N13	fs	35	31.6005	3.39946	TRUE	01/08/2023 12:07	112S	76	76.3333	19.9989	12	480	31.9366	6.40053	34.9874	332.302	323.412	0.750737	2.43802	-0.011024	96.6347	0.000361	8.2996	1.878	0.4255	0.175308	1.8184	7.18501	2.30227	0.994601	0.189296	125.646	14.5294	128.795	28.9172	1.58299	251.081	4.18173	2.21455	0.00156233	0.0560212	0.0272469	1463.03	2.05025	21.5072	479.777	0.0842012	0.161174
particle-associated	N13	fs	35	31.6005	3.39946	TRUE	01/08/2023 12:07	112S	76	76.3333	19.9989	12	480	31.9366	6.40053	34.9874	332.302	323.412	0.750737	2.43802	-0.011024	96.6347	0.000361	8.2996	1.878	0.4255	0.175308	1.8184	7.18501	2.30227	0.994601	0.189296	125.646	14.5294	128.795	28.9172	1.58299	251.081	4.18173	2.21455	0.00156233	0.0560212	0.0272469	1463.03	2.05025	21.5072	479.777	0.0842012	0.161174
free-living	N13	fs	35	31.6005	3.39946	TRUE	01/08/2023 12:07	112S	76	76.3333	19.9989	12	480	31.9366	6.40053	34.9874	332.302	323.412	0.750737	2.43802	-0.011024	96.6347	0.000361	8.2996	1.878	0.4255	0.175308	1.8184	7.18501	2.30227	0.994601	0.189296	125.646	14.5294	128.795	28.9172	1.58299	251.081	4.18173	2.21455	0.00156233	0.0560212	0.0272469	1463.03	2.05025	21.5072	479.777	0.0842012	0.161174
particle-associated	N15	susp	30	30.0964	0.096421	TRUE	02/08/2023 16:13	115T	82	77.222	19.3445	15	244	30.4175	0.86613	34.5843	386.887	376.435	0.945279	7.07535	0.111726	97.2458	8.2e-05	8.0128	1.7417	0.5578	0.175829	1.8544	7.18501	2.30227	0.994601	0.189296	139.517	10.2776	119.975	29.6813	1.68749	373.331	4.53865	2.7612	0.00156233	0.0560212	0.0272469	1463.03	2.05025	21.5072	479.777	0.0842012	0.161174
free-living	N15	susp	30	30.0964	0.096421	TRUE	02/08/2023 16:13	115T	82	77.222	19.3445	15	244	30.4175	0.86613	34.5843	386.887	376.435	0.945279	7.07535	0.111726	97.2458	8.2e-05	8.0128	1.7417	0.5578	0.175829	1.8544	7.18501	2.30227	0.994601	0.189296	139.517	10.2776	119.975	29.6813	1.68749	373.331	4.53865	2.7612	0.00156233	0.0560212	0.0272469	1463.03	2.05025	21.5072	479.777	0.0842012	0.161174
particle-associated	N15	susp	30	30.0964	0.096421	TRUE	02/08/2023 16:13	115T	82	77.222	19.3445	15	244	30.4175	0.86613	34.5843	386.887	376.435	0.945279	7.07535	0.111726	97.2458	8.2e-05	8.0128	1.7417	0.5578	0.175829	1.8544	7.18501	2.30227	0.994601	0.189296	139.517	10.2776	119.975	29.6813	1.68749	373.331	4.53865	2.7612	0.00156233	0.0560212	0.0272469	1463.03	2.05025	21.5072	479.777	0.0842012	0.161174
free-living	N15	susp	30	30.0964	0.096421	TRUE	02/08/2023 16:13	115T	82	77.222	19.3445	15	244	30.4175	0.86613	34.5843	386.887	376.435	0.945279	7.07535	0.111726	97.2458	8.2e-05	8.0128	1.7417	0.5578	0.175829	1.8544	7.18501	2.30227	0.994601	0.189296	139.517	10.2776	119.975	29.6813	1.68749	373.331	4.53865	2.7612	0.00156233	0.0560212	0.0272469	1463.03	2.05025	21.5072	479.777	0.0842012	0.161174
particle-associated	N15	susp	30	30.0964	0.096421	TRUE	02/08/2023 16:13	115T	82	77.222	19.3445	15	244	30.4175	0.86613	34.5843	386.887	376.435	0.945279	7.07535	0.111726	97.2458	8.2e-05	8.0128	1.7417	0.5578	0.175829	1.8544	7.18501	2.30227	0.994601	0.189296	139.517	10.2776	119.975	29.6813	1.68749	373.331	4.53865	2.7612	0.00156233	0.0560212	0.0272469	1463.03	2.05025	21.5072	479.777	0.0842012	0.161174
free-living	N15	susp	30	30.0964	0.096421	TRUE	02/08/2023 16:13	115T	82	77.222	19.3445	15	244	30.4175	0.86613	34.5843	386.887	376.435	0.945279	7.07535	0.111726	97.2458	8.2e-05	8.0128	1.7417	0.5578	0.175829	1.8544	7.18501	2.30227	0.994601	0.189296	139.517	10.2776	119.975	29.6813	1.68749	373.331	4.53865	2.7612	0.00156233	0.0560212	0.0272469	1463.03	2.05025	21.5072	479.777	0.0842012	0.161174
particle-associated	N15	ss	30	30.0964	0.096421	TRUE	02/08/2023 16:13	115T	82	77.222	19.3445	15	244	30.4175	0.86613	34.5843	386.887	376.435	0.945279	7.07535	0.111726	97.2458	8.2e-05	8.0128	1.7417	0.5578	0.175829	1.8544	7.18501	2.30227	0.994601	0.189296	139.517	10.2776	119.975	29.6813	1.68749	373.331	4.53865	2.7612	0.00156233	0.0560212	0.0272469	1463.03	2.05025	21.5072	479.777	0.0842012	0.161174
free-living	N15	ss	30	30.0964	0.096421	TRUE	02/08/2023 16:13	115T	82	77.222	19.3445	15	244	30.4175	0.86613	34.5843	386.887	376.435	0.945279	7.07535	0.111726	97.2458	8.2e-05	8.0128	1.7417	0.5578	0.175829	1.8544	7.18501	2.30227	0.994601	0.189296	139.517	10.2776	119.975	29.6813	1.68749	373.331	4.53865	2.7612	0.00156233	0.0560212	0.0272469	1463.03	2.05025	21.5072	479.777	0.0842012	0.161174
particle-associated	N15	ss	30	30.0964	0.096421	TRUE	02/08/2023 16:13	115T	82	77.222	19.3445	15	244	30.4175	0.86613	34.5843	386.887	376.435	0.945279	7.07535	0.111726	97.2458	8.2e-05	8.0128	1.7417	0.5578	0.175829	1.8544	7.18501	2.30227	0.994601	0.189296	139.517	10.2776	119.975	29.6813	1.68749	373.331	4.53865	2.7612	0.00156233	0.0560212	0.0272469	1463.03	2.05025	21.5072	479.777	0.0842012	0.161174
free-living	N15	ss	30	30.0964	0.096421	TRUE	02/08/2023 16:13	115T	82	77.222	19.3445	15	244	30.4175	0.86613	34.5843	386.887	376.435	0.945279	7.07535	0.111726	97.2458	8.2e-05	8.0128	1.7417	0.5578	0.175829	1.8544	7.18501	2.30227	0.994601	0.189296	139.517	10.2776	119.975	29.6813	1.68749	373.331	4.53865	2.7612	0.00156233	0.0560212	0.0272469	1463.03	2.05025	21.5072	479.777	0.0842012	0.161174
particle-associated	N15	ss	30	30.0964	0.096421	TRUE	02/08/2023 16:13	115T	82	77.222	19.3445	15	244	30.4175	0.86613	34.5843	386.887	376.435	0.945279	7.07535	0.111726	97.2458	8.2e-05	8.0128	1.7417	0.5578	0.175829	1.8544	7.18501	2.30227	0.994601	0.189296	139.517	10.2776	119.975	29.6813	1.68749	373.331	4.53865	2.7612	0.00156233	0.0560212	0.0272469	1463.03	2.05025	21.5072	479.777	0.0842012	0.161174
free-living	N15	ss	30	30.0964	0.096421	TRUE	02/08/2023 16:13	115T	82	77.222	19.3445	15	244	30.4175	0.86613	34.5843	386.887	376.435	0.945279	7.07535	0.111726	97.2458	8.2e-05	8.0128	1.7417	0.5578	0.175829	1.8544	7.18501	2.30227	0.994601	0.189296	139.517	10.2776	119.975	29.6813	1.68749	373.331	4.53865	2.7612	0.00156233	0.0560212	0.0272469	1463.03	2.05025	21.5072	479.777	0.0842012	0.161174
particle-associated	N15	fs	30	30.0964	0.096421	TRUE	02/08/2023 16:13	115T	82	77.222	19.3445	15	244	30.4175	0.86613	34.5843	386.887	376.435	0.945279	7.07535	0.111726	97.2458	8.2e-05	8.0128	1.7417	0.5578	0.175829	1.8544	7.18501	2.30227	0.994601	0.189296	139.517	10.2776	119.975	29.6813	1.68749	373.331	4.53865	2.7612	0.00156233	0.0560212	0.0272469	1463.03	2.05025	21.5072	479.777	0.0842012	0.161174
free-living	N15	fs	30	30.0964	0.096421	TRUE	02/08/2023 16:13	115T	82	77.222	19.3445	15	244	30.4175	0.86613	34.5843	386.887	376.435	0.945279	7.07535	0.111726	97.2458	8.2e-05	8.0128	1.7417	0.5578	0.175829	1.8544	7.18501	2.30227	0.994601	0.189296	139.517	10.2776	119.975	29.6813	1.68749	373.331	4.53865	2.7612	0.00156233	0.0560212	0.0272469	1463.03	2.05025	21.5072	479.777	0.0842012	0.161174
particle-associated	N15	fs	30	30.0964	0.096421	TRUE	02/08/2023 16:13	115T	82	77.222	19.3445	15	244	30.4175	0.86613	34.5843	386.887	376.435	0.945279	7.07535	0.111726	97.2458	8.2e-05	8.0128	1.7417	0.5578	0.175829	1.8544	7.18501	2.30227	0.994601	0.189296	139.517	10.2776	119.975	29.6813	1.68749	373.331	4.53865	2.7612	0.00156233	0.0560212	0.0272469	1463.03	2.05025	21.5072	479.777	0.0842012	0.161174
free-living	N15	fs	30	30.0964	0.096421	TRUE	02/08/2023 16:13	115T	82	77.222	19.3445	15	244	30.4175	0.86613	34.5843	386.887	376.435	0.945279	7.07535	0.111726	97.2458	8.2e-05	8.0128	1.7417	0.5578	0.175829	1.8544	7.18501	2.30227	0.994601	0.189296	139.517	10.2776	119.975	29.6813	1.68749	373.331	4.53865	2.7612	0.00156233	0.0560212	0.0272469	1463.03	2.05025	21.5072	479.777	0.0842012	0.161174
particle-associated	N15	fs	30	30.0964	0.096421	TRUE	02/08/2023 16:13	115T	82	77.222	19.3445	15	244	30.4175	0.86613	34.5843	386.887	376.435	0.945279	7.07535	0.111726	97.2458	8.2e-05	8.0128	1.7417	0.5578	0.175829	1.8544	7.18501	2.30227	0.994601	0.189296	139.517	10.2776	119.975	29.6813	1.68749	373.331	4.53865	2.7612	0.00156233	0.0560212	0.0272469	1463.03	2.05025	21.5072	479.777	0.0842012	0.161174
free-living	N15	fs	30	30.0964	0.096421	TRUE	02/08/2023 16:13	115T	82	77.222	19.3445	15	244	30.4175	0.86613	34.5843	386.887	376.435	0.945279	7.07535	0.111726	97.2458	8.2e-05	8.0128	1.7417	0.5578	0.175829	1.8544	7.18501	2.30227	0.994601	0.189296	139.517	10.2776	119.975	29.6813	1.68749	373.331	4.53865	2.7612	0.00156233	0.0560212	0.0272469	1463.03	2.05025	21.5072	479.777	0.0842012	0.161174
particle-associated	N16	susp	28.5	30.0761	1.57608	TRUE	03/08/2023 16:31	117T	85	78.5096	19.2822	15	255	30.3984	3.9586	34.3323	346.769	337.559	0.648173	0.235519	0.197751	95.1762	0.000543	1.2	1.51	0.29	0.151749	1.8256	7.18501	2.30227	0.994601	0.189296	155.301	3.26198	100.569	39.9973	2.20998	522.746	4.94425	3.53912	0.00156233	0.0560212	0.0272469	1463.03	2.05025	21.5072	479.777	0.0842012	0.161174
free-living	N16	susp	28.5	30.0761	1.57608	TRUE	03/08/2023 16:31	117T	85	78.5096	19.2822	15	255	30.3984	3.9586	34.3323	346.769	337.559	0.648173	0.235519	0.197751	95.1762	0.000543	1.2	1.51	0.29	0.151749	1.8256	7.18501	2.30227	0.994601	0.189296	155.301	3.26198	100.569	39.9973	2.20998	522.746	4.94425	3.53912	0.00156233	0.0560212	0.0272469	1463.03	2.05025	21.5072	479.777	0.0842012	0.161174
particle-associated	N16	susp	28.5	30.0761	1.57608	TRUE	03/08/2023 16:31	117T	85	78.5096	19.2822	15	255	30.3984	3.9586	34.3323	346.769	337.559	0.648173	0.235519	0.197751	95.1762	0.000543	1.2	1.51	0.29	0.151749	1.8256	7.18501	2.30227	0.994601	0.189296	155.301	3.26198	100.569	39.9973	2.20998	522.746	4.94425	3.53912	0.00156233	0.0560212	0.0272469	1463.03	2.05025	21.5072	479.777	0.0842012	0.161174
free-living	N16	susp	28.5	30.0761	1.57608	TRUE	03/08/2023 16:31	117T	85	78.5096	19.2822	15	255	30.3984	3.9586	34.3323	346.769	337.559	0.648173	0.235519	0.197751	95.1762	0.000543	1.2	1.51	0.29	0.151749	1.8256	7.18501	2.30227	0.994601	0.189296	155.301	3.26198	100.569	39.9973	2.20998	522.746	4.94425	3.53912	0.00156233	0.0560212	0.0272469	1463.03	2.05025	21.5072	479.777	0.0842012	0.161174
particle-associated	N16	susp	28.5	30.0761	1.57608	TRUE	03/08/2023 16:31	117T	85	78.5096	19.2822	15	255	30.3984	3.9586	34.3323	346.769	337.559	0.648173	0.235519	0.197751	95.1762	0.000543	1.2	1.51	0.29	0.151749	1.8256	7.18501	2.30227	0.994601	0.189296	155.301	3.26198	100.569	39.9973	2.20998	522.746	4.94425	3.53912	0.00156233	0.0560212	0.0272469	1463.03	2.05025	21.5072	479.777	0.0842012	0.161174
free-living	N16	susp	28.5	30.0761	1.57608	TRUE	03/08/2023 16:31	117T	85	78.5096	19.2822	15	255	30.3984	3.9586	34.3323	346.769	337.559	0.648173	0.235519	0.197751	95.1762	0.000543	1.2	1.51	0.29	0.151749	1.8256	7.18501	2.30227	0.994601	0.189296	155.301	3.26198	100.569	39.9973	2.20998	522.746	4.94425	3.53912	0.00156233	0.0560212	0.0272469	1463.03	2.05025	21.5072	479.777	0.0842012	0.161174
particle-associated	N16	ss	28.5	30.0761	1.57608	TRUE	03/08/2023 16:31	117T	85	78.5096	19.2822	15	255	30.3984	3.9586	34.3323	346.769	337.559	0.648173	0.235519	0.197751	95.1762	0.000543	1.2	1.51	0.29	0.151749	1.8256	7.18501	2.30227	0.994601	0.189296	155.301	3.26198	100.569	39.9973	2.20998	522.746	4.94425	3.53912	0.00156233	0.0560212	0.0272469	1463.03	2.05025	21.5072	479.777	0.0842012	0.161174
free-living	N16	ss	28.5	30.0761	1.57608	TRUE	03/08/2023 16:31	117T	85	78.5096	19.2822	15	255	30.3984	3.9586	34.3323	346.769	337.559	0.648173	0.235519	0.197751	95.1762	0.000543	1.2	1.51	0.29	0.151749	1.8256	7.18501	2.30227	0.994601	0.189296	155.301	3.26198	100.569	39.9973	2.20998	522.746	4.94425	3.53912	0.00156233	0.0560212	0.0272469	1463.03	2.05025	21.5072	479.777	0.0842012	0.161174
particle-associated	N16	ss	28.5	30.0761	1.57608	TRUE	03/08/2023 16:31	117T	85	78.5096	19.2822	15	255	30.3984	3.9586	34.3323	346.769	337.559	0.648173	0.235519	0.197751	95.1762	0.000543	1.2	1.51	0.29	0.151749	1.8256	7.18501	2.30227	0.994601	0.189296	155.301	3.26198	100.569	39.9973	2.20998	522.746	4.94425	3.53912	0.00156233	0.0560212	0.0272469	1463.03	2.05025	21.5072	479.777	0.0842012	0.161174
free-living	N16	ss	28.5	30.0761	1.57608	TRUE	03/08/2023 16:31	117T	85	78.5096	19.2822	15	255	30.3984	3.9586	34.3323	346.769	337.559	0.648173	0.235519	0.197751	95.1762	0.000543	1.2	1.51	0.29	0.151749	1.8256	7.18501	2.30227	0.994601	0.189296	155.301	3.26198	100.569	39.9973	2.20998	522.746	4.94425	3.53912	0.00156233	0.0560212	0.0272469	1463.03	2.05025	21.5072	479.777	0.0842012	0.161174
particle-associated	N16	ss	28.5	30.0761	1.57608	TRUE	03/08/2023 16:31	117T	85	78.5096	19.2822	15	255	30.3984	3.9586	34.3323	346.769	337.559	0.648173	0.235519	0.197751	95.1762	0.000543	1.2	1.51	0.29	0.151749	1.8256	7.18501	2.30227	0.994601	0.189296	155.301	3.26198	100.569	39.9973	2.20998	522.746	4.94425	3.53912	0.00156233	0.0560212	0.0272469	1463.03	2.05025	21.5072	479.777	0.0842012	0.161174
free-living	N16	ss	28.5	30.0761	1.57608	TRUE	03/08/2023 16:31	117T	85	78.5096	19.2822	15	255	30.3984	3.9586	34.3323	346.769	337.559	0.648173	0.235519	0.197751	95.1762	0.000543	1.2	1.51	0.29	0.151749	1.8256	7.18501	2.30227	0.994601	0.189296	155.301	3.26198	100.569	39.9973	2.20998	522.746	4.94425	3.53912	0.00156233	0.0560212	0.0272469	1463.03	2.05025	21.5072	479.777	0.0842012	0.161174
particle-associated	N16	fs	28.5	30.0761	1.57608	TRUE	03/08/2023 16:31	117T	85	78.5096	19.2822	15	255	30.3984	3.9586	34.3323	346.769	337.559	0.648173	0.235519	0.197751	95.1762	0.000543	1.2	1.51	0.29	0.151749	1.8256	7.18501	2.30227	0.994601	0.189296	155.301	3.26198	100.569	39.9973	2.20998	522.746	4.94425	3.53912	0.00156233	0.0560212	0.0272469	1463.03	2.05025	21.5072	479.777	0.0842012	0.161174
free-living	N16	fs	28.5	30.0761	1.57608	TRUE	03/08/2023 16:31	117T	85	78.5096	19.2822	15	255	30.3984	3.9586	34.3323	346.769	337.559	0.648173	0.235519	0.197751	95.1762	0.000543	1.2	1.51	0.29	0.151749	1.8256	7.18501	2.30227	0.994601	0.189296	155.301	3.26198	100.569	39.9973	2.20998	522.746	4.94425	3.53912	0.00156233	0.0560212	0.0272469	1463.03	2.05025	21.5072	479.777	0.0842012	0.161174
particle-associated	N16	fs	28.5	30.0761	1.57608	TRUE	03/08/2023 16:31	117T	85	78.5096	19.2822	15	255	30.3984	3.9586	34.3323	346.769	337.559	0.648173	0.235519	0.197751	95.1762	0.000543	1.2	1.51	0.29	0.151749	1.8256	7.18501	2.30227	0.994601	0.189296	155.301	3.26198	100.569	39.9973	2.20998	522.746	4.94425	3.53912	0.00156233	0.0560212	0.0272469	1463.03	2.05025	21.5072	479.777	0.0842012	0.161174
free-living	N16	fs	28.5	30.0761	1.57608	TRUE	03/08/2023 16:31	117T	85	78.5096	19.2822	15	255	30.3984	3.9586	34.3323	346.769	337.559	0.648173	0.235519	0.197751	95.1762	0.000543	1.2	1.51	0.29	0.151749	1.8256	7.18501	2.30227	0.994601	0.189296	155.301	3.26198	100.569	39.9973	2.20998	522.746	4.94425	3.53912	0.00156233	0.0560212	0.0272469	1463.03	2.05025	21.5072	479.777	0.0842012	0.161174
particle-associated	N16	fs	28.5	30.0761	1.57608	TRUE	03/08/2023 16:31	117T	85	78.5096	19.2822	15	255	30.3984	3.9586	34.3323	346.769	337.559	0.648173	0.235519	0.197751	95.1762	0.000543	1.2	1.51	0.29	0.151749	1.8256	7.18501	2.30227	0.994601	0.189296	155.301	3.26198	100.569	39.9973	2.20998	522.746	4.94425	3.53912	0.00156233	0.0560212	0.0272469	1463.03	2.05025	21.5072	479.777	0.0842012	0.161174
free-living	N16	fs	28.5	30.0761	1.57608	TRUE	03/08/2023 16:31	117T	85	78.5096	19.2822	15	255	30.3984	3.9586	34.3323	346.769	337.559	0.648173	0.235519	0.197751	95.1762	0.000543	1.2	1.51	0.29	0.151749	1.8256	7.18501	2.30227	0.994601	0.189296	155.301	3.26198	100.569	39.9973	2.20998	522.746	4.94425	3.53912	0.00156233	0.0560212	0.0272469	1463.03	2.05025	21.5072	479.777	0.0842012	0.161174
particle-associated	N03	susp	31	30.082	0.91795	TRUE	07/08/2023 12:15	162S	99	72.8601	19.0705	12	600	30.3969	8.16864	34.9698	297.77	289.862	0.653762	4.8519	0.081864	94.4172	0.001199	6.77	2.0136	0.4202	0.174047	1.8112	7.18501	2.30227	0.994601	0.189296	128.037	14.1042	132.912	22.0399	1.22769	237.498	3.97082	2.23558	0.00156233	0.0560212	0.0272469	1463.03	2.05025	21.5072	479.777	0.0842012	0.161174
free-living	N03	susp	31	30.082	0.91795	TRUE	07/08/2023 12:15	162S	99	72.8601	19.0705	12	600	30.3969	8.16864	34.9698	297.77	289.862	0.653762	4.8519	0.081864	94.4172	0.001199	6.77	2.0136	0.4202	0.174047	1.8112	7.18501	2.30227	0.994601	0.189296	128.037	14.1042	132.912	22.0399	1.22769	237.498	3.97082	2.23558	0.00156233	0.0560212	0.0272469	1463.03	2.05025	21.5072	479.777	0.0842012	0.161174
particle-associated	N03	susp	31	30.082	0.91795	TRUE	07/08/2023 12:15	162S	99	72.8601	19.0705	12	600	30.3969	8.16864	34.9698	297.77	289.862	0.653762	4.8519	0.081864	94.4172	0.001199	6.77	2.0136	0.4202	0.174047	1.8112	7.18501	2.30227	0.994601	0.189296	128.037	14.1042	132.912	22.0399	1.22769	237.498	3.97082	2.23558	0.00156233	0.0560212	0.0272469	1463.03	2.05025	21.5072	479.777	0.0842012	0.161174
free-living	N03	susp	31	30.082	0.91795	TRUE	07/08/2023 12:15	162S	99	72.8601	19.0705	12	600	30.3969	8.16864	34.9698	297.77	289.862	0.653762	4.8519	0.081864	94.4172	0.001199	6.77	2.0136	0.4202	0.174047	1.8112	7.18501	2.30227	0.994601	0.189296	128.037	14.1042	132.912	22.0399	1.22769	237.498	3.97082	2.23558	0.00156233	0.0560212	0.0272469	1463.03	2.05025	21.5072	479.777	0.0842012	0.161174
particle-associated	N03	susp	31	30.082	0.91795	TRUE	07/08/2023 12:15	162S	99	72.8601	19.0705	12	600	30.3969	8.16864	34.9698	297.77	289.862	0.653762	4.8519	0.081864	94.4172	0.001199	6.77	2.0136	0.4202	0.174047	1.8112	7.18501	2.30227	0.994601	0.189296	128.037	14.1042	132.912	22.0399	1.22769	237.498	3.97082	2.23558	0.00156233	0.0560212	0.0272469	1463.03	2.05025	21.5072	479.777	0.0842012	0.161174
free-living	N03	susp	31	30.082	0.91795	TRUE	07/08/2023 12:15	162S	99	72.8601	19.0705	12	600	30.3969	8.16864	34.9698	297.77	289.862	0.653762	4.8519	0.081864	94.4172	0.001199	6.77	2.0136	0.4202	0.174047	1.8112	7.18501	2.30227	0.994601	0.189296	128.037	14.1042	132.912	22.0399	1.22769	237.498	3.97082	2.23558	0.00156233	0.0560212	0.0272469	1463.03	2.05025	21.5072	479.777	0.0842012	0.161174
particle-associated	N03	ss	31	30.082	0.91795	TRUE	07/08/2023 12:15	162S	99	72.8601	19.0705	12	600	30.3969	8.16864	34.9698	297.77	289.862	0.653762	4.8519	0.081864	94.4172	0.001199	6.77	2.0136	0.4202	0.174047	1.8112	7.18501	2.30227	0.994601	0.189296	128.037	14.1042	132.912	22.0399	1.22769	237.498	3.97082	2.23558	0.00156233	0.0560212	0.0272469	1463.03	2.05025	21.5072	479.777	0.0842012	0.161174
free-living	N03	ss	31	30.082	0.91795	TRUE	07/08/2023 12:15	162S	99	72.8601	19.0705	12	600	30.3969	8.16864	34.9698	297.77	289.862	0.653762	4.8519	0.081864	94.4172	0.001199	6.77	2.0136	0.4202	0.174047	1.8112	7.18501	2.30227	0.994601	0.189296	128.037	14.1042	132.912	22.0399	1.22769	237.498	3.97082	2.23558	0.00156233	0.0560212	0.0272469	1463.03	2.05025	21.5072	479.777	0.0842012	0.161174
particle-associated	N03	ss	31	30.082	0.91795	TRUE	07/08/2023 12:15	162S	99	72.8601	19.0705	12	600	30.3969	8.16864	34.9698	297.77	289.862	0.653762	4.8519	0.081864	94.4172	0.001199	6.77	2.0136	0.4202	0.174047	1.8112	7.18501	2.30227	0.994601	0.189296	128.037	14.1042	132.912	22.0399	1.22769	237.498	3.97082	2.23558	0.00156233	0.0560212	0.0272469	1463.03	2.05025	21.5072	479.777	0.0842012	0.161174
free-living	N03	ss	31	30.082	0.91795	TRUE	07/08/2023 12:15	162S	99	72.8601	19.0705	12	600	30.3969	8.16864	34.9698	297.77	289.862	0.653762	4.8519	0.081864	94.4172	0.001199	6.77	2.0136	0.4202	0.174047	1.8112	7.18501	2.30227	0.994601	0.189296	128.037	14.1042	132.912	22.0399	1.22769	237.498	3.97082	2.23558	0.00156233	0.0560212	0.0272469	1463.03	2.05025	21.5072	479.777	0.0842012	0.161174
particle-associated	N03	ss	31	30.082	0.91795	TRUE	07/08/2023 12:15	162S	99	72.8601	19.0705	12	600	30.3969	8.16864	34.9698	297.77	289.862	0.653762	4.8519	0.081864	94.4172	0.001199	6.77	2.0136	0.4202	0.174047	1.8112	7.18501	2.30227	0.994601	0.189296	128.037	14.1042	132.912	22.0399	1.22769	237.498	3.97082	2.23558	0.00156233	0.0560212	0.0272469	1463.03	2.05025	21.5072	479.777	0.0842012	0.161174
free-living	N03	ss	31	30.082	0.91795	TRUE	07/08/2023 12:15	162S	99	72.8601	19.0705	12	600	30.3969	8.16864	34.9698	297.77	289.862	0.653762	4.8519	0.081864	94.4172	0.001199	6.77	2.0136	0.4202	0.174047	1.8112	7.18501	2.30227	0.994601	0.189296	128.037	14.1042	132.912	22.0399	1.22769	237.498	3.97082	2.23558	0.00156233	0.0560212	0.0272469	1463.03	2.05025	21.5072	479.777	0.0842012	0.161174
particle-associated	N03	fs	31	30.082	0.91795	TRUE	07/08/2023 12:15	162S	99	72.8601	19.0705	12	600	30.3969	8.16864	34.9698	297.77	289.862	0.653762	4.8519	0.081864	94.4172	0.001199	6.77	2.0136	0.4202	0.174047	1.8112	7.18501	2.30227	0.994601	0.189296	128.037	14.1042	132.912	22.0399	1.22769	237.498	3.97082	2.23558	0.00156233	0.0560212	0.0272469	1463.03	2.05025	21.5072	479.777	0.0842012	0.161174
free-living	N03	fs	31	30.082	0.91795	TRUE	07/08/2023 12:15	162S	99	72.8601	19.0705	12	600	30.3969	8.16864	34.9698	297.77	289.862	0.653762	4.8519	0.081864	94.4172	0.001199	6.77	2.0136	0.4202	0.174047	1.8112	7.18501	2.30227	0.994601	0.189296	128.037	14.1042	132.912	22.0399	1.22769	237.498	3.97082	2.23558	0.00156233	0.0560212	0.0272469	1463.03	2.05025	21.5072	479.777	0.0842012	0.161174
particle-associated	N03	fs	31	30.082	0.91795	TRUE	07/08/2023 12:15	162S	99	72.8601	19.0705	12	600	30.3969	8.16864	34.9698	297.77	289.862	0.653762	4.8519	0.081864	94.4172	0.001199	6.77	2.0136	0.4202	0.174047	1.8112	7.18501	2.30227	0.994601	0.189296	128.037	14.1042	132.912	22.0399	1.22769	237.498	3.97082	2.23558	0.00156233	0.0560212	0.0272469	1463.03	2.05025	21.5072	479.777	0.0842012	0.161174
free-living	N03	fs	31	30.082	0.91795	TRUE	07/08/2023 12:15	162S	99	72.8601	19.0705	12	600	30.3969	8.16864	34.9698	297.77	289.862	0.653762	4.8519	0.081864	94.4172	0.001199	6.77	2.0136	0.4202	0.174047	1.8112	7.18501	2.30227	0.994601	0.189296	128.037	14.1042	132.912	22.0399	1.22769	237.498	3.97082	2.23558	0.00156233	0.0560212	0.0272469	1463.03	2.05025	21.5072	479.777	0.0842012	0.161174
particle-associated	N03	fs	31	30.082	0.91795	TRUE	07/08/2023 12:15	162S	99	72.8601	19.0705	12	600	30.3969	8.16864	34.9698	297.77	289.862	0.653762	4.8519	0.081864	94.4172	0.001199	6.77	2.0136	0.4202	0.174047	1.8112	7.18501	2.30227	0.994601	0.189296	128.037	14.1042	132.912	22.0399	1.22769	237.498	3.97082	2.23558	0.00156233	0.0560212	0.0272469	1463.03	2.05025	21.5072	479.777	0.0842012	0.161174
free-living	N03	fs	31	30.082	0.91795	TRUE	07/08/2023 12:15	162S	99	72.8601	19.0705	12	600	30.3969	8.16864	34.9698	297.77	289.862	0.653762	4.8519	0.081864	94.4172	0.001199	6.77	2.0136	0.4202	0.174047	1.8112	7.18501	2.30227	0.994601	0.189296	128.037	14.1042	132.912	22.0399	1.22769	237.498	3.97082	2.23558	0.00156233	0.0560212	0.0272469	1463.03	2.05025	21.5072	479.777	0.0842012	0.161174
[truncated: 10 more columns]
