# Supplementary material
Source: Research Square preprint supplement (doi:10.21203/rs.3.rs-9051103/v1)
Supplement: Supplementary file 4 [file 8cdaee7b9cf4c3f5496aa774.xlsx]

## Sheet: n-arc_msc_nanosims_stats
Station	MSC fraction	Cell 15N at%	Cell diameter (µm)	Cell biovolume (µm3)	Cell PC (fmol C cell-1)	Cell PN (fmol cell-1)	Cell N2 fixation (fmol N cell-1 d-1)
N00	susp	0.38687	1.61	2.18512	850.072	163.475	2.99385
N00	susp	0.38626	1.28	1.09807	469.408	90.2707	1.62005
N00	susp	0.38362	1.19	0.882347	388.664	74.7432	1.22261
N00	susp	0.37963	1.48	1.6974	683.583	131.458	1.83459
N00	susp	0.39567	1.69	2.52731	963.79	185.344	4.37613
N00	susp	0.38168	1.08	0.659584	302.355	58.1453	0.883207
N00	susp	0.37745	3.62	24.8384	6925.96	1331.92	16.84
N00	susp	0.3742	2.12	4.98892	1733.27	333.322	3.56226
N00	susp	0.36811	0.98	0.492807	142.265	27.3586	0.192094
N00	susp	0.3928	4.76	56.4702	14070.5	2705.86	59.2129
N00	susp	0.37491	1.34	1.25983	528.516	101.638	1.12966
N00	susp	0.38305	1	0.523599	247.733	47.6409	0.762938
N00	susp	0.38371	0.72	0.195432	92.9661	17.8781	0.293408
N00	susp	0.37878	2.27	6.12458	2068.88	397.861	5.34886
N00	susp	0.38728	1.09	0.678076	309.657	59.5494	1.10527
N00	susp	0.39337	1.17	0.838603	371.978	71.5342	1.58994
N00	susp	0.39028	0.78	0.248475	103.824	19.9661	0.406636
N00	susp	0.38066	1.17	0.838603	371.978	71.5342	1.04266
N00	susp	0.37154	1.07	0.641431	295.161	56.7616	0.515736
N00	susp	0.37901	1.07	0.641431	295.161	56.7616	0.770964
N00	susp	0.37769	1.5	1.76715	707.757	136.107	1.74053
N00	susp	0.37347	1.08	0.659584	302.355	58.1453	0.595858
N00	susp	0.37421	1.22	0.950776	414.543	79.7198	0.852457
N00	susp	0.37884	4.08	35.5614	9440.24	1815.43	24.4723
N00	susp	0.36279	0.97	0.477874	140.265	26.9741	0.103015
N00	susp	0.38852	0.83	0.299387	113.118	21.7535	0.419994
N00	susp	0.37811	1.3	1.15035	488.633	93.9679	1.22541
N00	susp	0.35897	0.68	0.164636	85.9148	16.5221	0.0251071
N00	susp	0.38666	0.81	0.278262	109.374	21.0335	0.382543
N00	susp	0.37249	0.87	0.344791	120.71	23.2134	0.224191
N00	susp	0.37598	1.21	0.927587	405.803	78.039	0.91763
N00	susp	0.36352	0.96	0.463247	138.274	26.5911	0.113237
N00	susp	0.39339	0.78	0.248475	103.824	19.9661	0.444013
N00	susp	0.38355	0.86	0.333038	118.799	22.846	0.372739
N00	susp	0.38396	0.75	0.220893	98.3536	18.9141	0.313258
N00	susp	0.38919	0.93	0.42116	132.346	25.4512	0.50165
N00	susp	0.38591	1.03	0.572151	152.378	29.3034	0.519721
N00	susp	0.37638	0.88	0.356818	122.629	23.5824	0.282975
N00	susp	0.36958	0.81	0.278262	109.374	21.0335	0.166295
N00	susp	0.35852	0.85	0.321555	116.897	22.4802	0.0280719
N00	susp	0.37872	0.97	0.477874	140.265	26.9741	0.361667
N00	susp	0.37923	2.23	5.80648	1975.81	379.963	5.21116
N00	susp	0.38719	0.66	0.150533	82.4473	15.8552	0.293423
N00	susp	0.37121	0.72	0.195432	92.9661	17.8781	0.158889
N00	susp	0.3751	0.77	0.23904	101.991	19.6137	0.22024
N00	susp	0.36588	0.66	0.150533	82.4473	15.8552	0.0900422
N00	susp	0.3774	0.68	0.164636	85.9148	16.5221	0.208399
N00	susp	0.36299	0.7	0.179594	89.4213	17.1964	0.0677437
N00	susp	0.38875	0.68	0.164636	85.9148	16.5221	0.321278
N00	susp	0.37046	1.15	0.796328	177.406	34.1166	0.287804
N00	susp	0.38269	2.43	7.51307	2467.85	474.586	7.49733
N00	susp	0.38219	2.48	7.98645	2601.47	500.283	7.75271
N00	susp	0.38309	2.28	6.20588	2092.56	402.415	6.45409
N00	susp	0.36364	0.76	0.229847	100.168	19.263	0.0834219
N00	susp	0.37076	0.77	0.23904	101.991	19.6137	0.169001
N00	susp	0.37672	1.62	2.22609	863.81	166.117	2.0273
N00	susp	0.37938	1.21	0.927587	405.803	78.039	1.07734
N00	susp	0.38607	1.35	1.28825	538.788	103.613	1.84765
N00	susp	0.38395	0.92	0.40772	130.387	25.0743	0.415132
N00	susp	0.37096	0.66	0.150533	82.4473	15.8552	0.138525
N00	susp	0.38595	0.83	0.299387	113.118	21.7535	0.386342
N00	susp	0.38351	1	0.523599	247.733	47.6409	0.776129
N00	susp	0.38252	0.98	0.492807	142.265	27.3586	0.429402
N00	susp	0.38446	0.88	0.356818	122.629	23.5824	0.397672
N00	susp	0.38425	0.91	0.394569	128.435	24.699	0.413379
N00	susp	0.37317	1.07	0.641431	295.161	56.7616	0.571428
N00	susp	0.37858	0.72	0.195432	92.9661	17.8781	0.238201
N00	susp	0.38537	0.95	0.448921	136.29	26.2096	0.456331
N00	susp	0.34912	0.73	0.203689	94.7526	18.2217	0
N00	susp	0.37658	1.51	1.80272	720.037	138.469	1.67821
N00	susp	0.37833	0.78	0.248475	103.824	19.9661	0.263017
N00	susp	0.37688	1.98	4.06438	1452.28	279.284	3.4353
N00	susp	0.37429	1.16	0.817283	363.802	69.962	0.751485
N00	susp	0.3866	0.99	0.508047	241.37	46.4173	0.84253
N00	susp	0.37989	2.4	7.23823	2389.74	459.565	6.48548
N00	susp	0.378	1.2	0.904779	397.177	76.3802	0.990997
N00	susp	0.35926	0.69	0.172007	87.6632	16.8583	0.0285609
N00	susp	0.37682	0.74	0.212175	96.5485	18.567	0.22771
N00	fs	0.37289	0.72	0.195432	92.9661	17.8781	0.176968
N00	fs	0.35905	0.94	0.434893	134.314	25.8297	0.0404949
N00	fs	0.35427	0.8	0.268083	107.515	20.676	0
N00	fs	0.36463	0.67	0.157479	84.1761	16.1877	0.0797502
N00	fs	0.38927	0.73	0.203689	94.7526	18.2217	0.360031
N00	fs	0.38184	0.96	0.463247	138.274	26.5911	0.406471
N00	fs	0.37849	0.93	0.42116	132.346	25.4512	0.337724
N00	fs	0.37497	3.3	18.8166	5450.25	1048.12	11.6873
N00	fs	0.37396	0.93	0.42116	132.346	25.4512	0.268324
N00	fs	0.3839	0.66	0.150533	82.4473	15.8552	0.262023
N00	fs	0.38997	0.5	0.0654498	56.2062	10.8089	0.218121
N00	fs	0.38857	0.99	0.508047	144.272	27.7446	0.536499
N00	fs	0.38853	1.07	0.641431	295.161	56.7616	1.09624
N00	fs	0.37991	0.63	0.130924	77.3207	14.8694	0.210018
N00	fs	0.37055	0.54	0.082448	62.5042	12.02	0.102051
N00	fs	0.38963	0.52	0.0736222	59.3322	11.41	0.227916
N00	fs	0.37178	1.16	0.817283	363.802	69.962	0.645781
N00	fs	0.40407	0.57	0.0969668	67.3462	12.9512	0.371273
N00	fs	0.36662	0.47	0.0543616	51.6061	9.92424	0.0607805
N00	fs	0.36578	0.57	0.0969668	67.3462	12.9512	0.0727704
N00	fs	0.3714	0.6	0.113097	72.286	13.9012	0.125134
N00	fs	0.37052	0.45	0.0477129	48.6003	9.34621	0.0791812
N00	fs	0.35933	0.73	0.203689	94.7526	18.2217	0.0316384
N00	fs	0.36059	0.77	0.23904	101.991	19.6137	0.0489313
N00	fs	0.38732	0.88	0.356818	122.629	23.5824	0.43827
N00	fs	0.39063	0.73	0.203689	94.7526	18.2217	0.374947
N00	fs	0.3778	0.73	0.203689	94.7526	18.2217	0.234224
N00	fs	0.37914	1.03	0.572151	267.436	51.4299	0.702571
N00	fs	0.36082	1.19	0.882347	388.664	74.7432	0.196814
N00	fs	0.3768	0.97	0.477874	140.265	26.9741	0.330492
N00	fs	0.37146	1.11	0.71609	324.582	62.4197	0.564139
N00	fs	0.38374	1.38	1.37606	570.336	109.68	1.802
N00	fs	0.37587	0.71	0.187402	91.1889	17.5363	0.205042
N00	fs	0.37699	0.89	0.369121	124.556	23.953	0.296217
N00	fs	0.37962	1.27	1.07253	459.972	88.4562	1.23393
N00	fs	0.37109	0.74	0.212175	96.5485	18.567	0.16367
N00	fs	0.37051	0.94	0.434893	134.314	25.8297	0.218674
N00	fs	0.37776	0.7	0.179594	89.4213	17.1964	0.220631
N00	fs	0.38063	0.92	0.40772	130.387	25.0743	0.365023
N00	fs	0.36404	0.78	0.248475	103.824	19.9661	0.0912739
N00	fs	0.37751	2.31	6.45408	2164.59	416.267	5.27809
N00	fs	0.38301	2.12	4.98892	1733.27	333.322	5.3299
N00	fs	0.37693	0.89	0.369121	124.556	23.953	0.295352
N00	fs	0.38167	0.91	0.394569	128.435	24.699	0.375021
N00	fs	0.37238	1.03	0.572151	267.436	51.4299	0.493297
N00	fs	0.35407	1.42	1.49921	614.127	118.101	0
N00	fs	0.37162	0.83	0.299387	113.118	21.7535	0.1987
N00	fs	0.37034	1.2	0.904779	188.138	36.1803	0.3026
N00	fs	0.37015	0.82	0.288696	111.242	21.3927	0.176475
N00	fs	0.3806	2.55	8.68199	2795.87	537.666	7.81744
N00	fs	0.38288	1.01	0.539464	254.198	48.8842	0.777845
N00	fs	0.34052	0.86	0.333038	118.799	22.846	0
N10	susp	0.49995	0.89	0.369121	124.556	23.953	4.23689
N10	susp	0.4725	0.63	0.130924	77.3207	14.8694	2.12704
N10	susp	0.61889	1.44	1.56346	636.772	122.456	39.6131
N10	susp	0.41013	0.72	0.195432	92.9661	17.8781	1.18302
N10	susp	0.55979	1.28	1.09807	469.408	90.2707	22.6256
N10	susp	0.42839	0.6	0.113097	72.286	13.9012	1.23273
N10	susp	0.65159	1.89	3.53496	1287.49	247.594	90.0732
N10	susp	0.4177	0.6	0.113097	72.286	13.9012	1.04957
N10	susp	0.50095	0.9	0.381704	126.491	24.3252	4.33271
N10	susp	0.47196	0.85	0.321555	116.897	22.4802	3.2008
N10	susp	0.54166	0.66	0.150533	82.4473	15.8552	3.61967
N10	susp	0.38157	0.64	0.137258	79.0194	15.196	0.470597
N10	susp	0.4942	0.62	0.124788	75.6321	14.5446	2.46962
N10	susp	0.66598	0.79	0.258155	105.665	20.3202	7.75278
N10	susp	0.39263	1.19	0.882347	388.664	74.7432	3.33361
N10	susp	0.43483	0.59	0.107536	70.6287	13.5824	1.31229
N10	susp	0.46101	0.56	0.0919523	65.7211	12.6387	1.62895
N10	susp	0.73006	0.91	0.394569	128.435	24.699	11.3743
N10	susp	0.65108	0.75	0.220893	98.3536	18.9141	6.86897
N10	susp	0.47655	0.88	0.356818	122.629	23.5824	3.49115
N10	susp	0.52408	0.63	0.130924	77.3207	14.8694	3.07239
N10	susp	0.4238	0.65	0.143793	80.7283	15.5247	1.28887
N10	susp	0.37988	0.63	0.130924	77.3207	14.8694	0.429506
N10	susp	0.93849	0.92	0.40772	130.387	25.0743	17.989
N10	susp	0.48635	2.01	4.25194	1509.94	290.372	46.4944
N10	susp	0.65931	1.28	1.09807	469.408	90.2707	33.6989
N10	susp	0.45161	1.54	1.91232	757.661	145.704	17.091
N10	susp	0.38794	3.44	21.3144	6069.23	1167.16	45.3092
N10	susp	0.37044	2.13	5.05985	1754.52	337.408	5.82015
N10	susp	0.37846	0.97	0.477874	140.265	26.9741	0.731943
N10	susp	0.5544	1.42	1.49921	614.127	118.101	28.8165
N10	susp	0.44258	1.52	1.83878	732.448	140.855	14.9545
N10	susp	0.40111	0.97	0.477874	140.265	26.9741	1.48502
N10	susp	1.0642	2.04	4.44518	1568.98	301.726	263.219
N10	susp	0.36504	0.97	0.477874	140.265	26.9741	0.285752
N10	susp	0.38727	0.96	0.463247	138.274	26.5911	1.01031
N10	susp	0.51556	1.14	0.775735	347.785	66.8817	13.1171
N10	susp	0.40689	1.02	0.555647	260.765	50.1471	3.11804
N10	susp	0.36945	1.35	1.28825	538.788	103.613	1.66085
N10	susp	0.37212	1.37	1.34636	559.697	107.634	2.07953
N10	susp	0.36771	1.26	1.04739	450.654	86.6642	1.2033
N10	susp	0.34802	2.27	6.12458	2068.88	397.861	0
N10	susp	0.41758	0.78	0.248475	103.824	19.9661	1.50453
N10	susp	0.39402	0.94	0.434893	134.314	25.8297	1.19628
N10	susp	0.37236	1.05	0.606131	156.476	30.0915	0.59028
N10	susp	0.34961	0.83	0.299387	113.118	21.7535	0
N10	susp	0.36937	1.02	0.555647	150.34	28.9115	0.460581
N10	susp	0.36324	0.79	0.258155	105.665	20.3202	0.17018
N10	susp	0.38348	0.53	0.0779518	60.9125	11.7139	0.39034
N10	susp	0.37841	0.97	0.477874	140.265	26.9741	0.730281
N10	susp	0.4012	0.53	0.0779518	60.9125	11.7139	0.646191
N10	susp	0.37472	0.58	0.10216	68.9821	13.2658	0.298813
N10	susp	0.37802	1.3	1.15035	488.633	93.9679	2.49886
N10	susp	0.3747	0.72	0.195432	92.9661	17.8781	0.402265
N10	susp	0.38486	0.77	0.23904	101.991	19.6137	0.686943
N10	susp	0.33347	0.58	0.10216	68.9821	13.2658	0
N10	susp	0.39376	0.48	0.0579058	53.1274	10.2168	0.469909
N10	susp	0.38276	0.55	0.0871137	64.1071	12.3283	0.39987
N10	susp	0.3894	1.11	0.71609	324.582	62.4197	2.53546
N10	susp	0.38689	0.56	0.0919523	65.7211	12.6387	0.474277
N10	susp	0.38065	0.8	0.268083	107.515	20.676	0.616856
N10	susp	0.38046	1.08	0.659584	302.355	58.1453	1.72111
N10	susp	0.3609	0.76	0.229847	100.168	19.263	0.105766
N10	susp	0.39042	0.51	0.0694559	57.7634	11.1083	0.465183
N10	susp	0.38397	0.51	0.0694559	57.7634	11.1083	0.376869
N10	susp	0.36594	0.56	0.0919523	65.7211	12.6387	0.147909
N10	susp	0.38363	0.48	0.0579058	53.1274	10.2168	0.34234
N10	susp	0.40351	0.51	0.0694559	57.7634	11.1083	0.644412
N10	susp	0.37489	1.3	1.15035	488.633	93.9679	2.13633
N10	susp	0.37422	0.53	0.0779518	60.9125	11.7139	0.256639
N10	susp	0.379	0.66	0.150533	82.4473	15.8552	0.440786
N10	susp	0.38685	0.53	0.0779518	60.9125	11.7139	0.438998
N10	susp	0.36459	0.63	0.130924	77.3207	14.8694	0.149272
N10	susp	0.38945	0.98	0.492807	142.265	27.3586	1.11298
N10	susp	0.37676	0.72	0.195432	92.9661	17.8781	0.44766
N10	susp	0.41496	0.79	0.258155	105.665	20.3202	1.46559
N10	susp	0.36023	0.95	0.448921	136.29	26.2096	0.122262
N10	susp	0.37366	0.53	0.0779518	60.9125	11.7139	0.248553
N10	susp	0.46286	0.74	0.212175	96.5485	18.567	2.43536
N10	susp	0.36725	0.57	0.0969668	67.3462	12.9512	0.172479
N10	susp	0.37204	0.55	0.0871137	64.1071	12.3283	0.236971
N10	susp	0.36107	0.87	0.344791	120.71	23.2134	0.13232
N10	susp	0.35331	0.82	0.288696	111.242	21.3927	0
N10	susp	0.37038	0.68	0.164636	85.9148	16.5221	0.283777
N10	susp	0.37203	0.59	0.107536	70.6287	13.5824	0.260911
N10	susp	0.39372	0.77	0.23904	101.991	19.6137	0.901141
N10	susp	0.36243	0.55	0.0871137	64.1071	12.3283	0.0909397
N10	susp	0.38458	1.13	0.755499	173.162	33.3005	1.15481
N10	susp	0.37789	0.85	0.321555	116.897	22.4802	0.594207
N10	susp	0.3732	1.35	1.28825	538.788	103.613	2.13977
N10	susp	0.38443	0.9	0.381704	126.491	24.3252	0.839065
N10	susp	0.3984	0.51	0.0694559	57.7634	11.1083	0.574446
N10	susp	0.37624	0.75	0.220893	98.3536	18.9141	0.46148
N10	susp	0.35518	0.65	0.143793	80.7283	15.5247	0
N10	susp	0.37431	0.8	0.268083	107.515	20.676	0.45528
N10	susp	0.37163	0.62	0.124788	75.6321	14.5446	0.272223
N10	susp	0.3853	0.67	0.157479	84.1761	16.1877	0.575732
N10	susp	0.36216	0.62	0.124788	75.6321	14.5446	0.102448
N10	susp	0.37722	1.17	0.838603	371.978	71.5342	1.83175
N10	susp	0.36423	0.62	0.124788	75.6321	14.5446	0.139558
N10	susp	0.36447	0.83	0.299387	113.118	21.7535	0.215164
N10	susp	0.36601	1.03	0.572151	267.436	51.4299	0.606318
N10	susp	0.38113	0.75	0.220893	98.3536	18.9141	0.575483
N10	susp	0.37785	1.07	0.641431	295.161	56.7616	1.49755
N10	susp	0.3757	0.7	0.179594	89.4213	17.1964	0.408123
N10	susp	0.38425	0.74	0.212175	96.5485	18.567	0.636324
N10	susp	0.38256	0.65	0.143793	80.7283	15.5247	0.499719
N10	susp	0.40051	0.63	0.130924	77.3207	14.8694	0.807611
N10	susp	0.35884	0.78	0.248475	103.824	19.9661	0.0589295
N10	susp	0.38218	0.61	0.118847	73.9538	14.2219	0.451123
N10	susp	0.35211	1.01	0.539464	254.198	48.8842	0
N10	susp	0.38651	0.65	0.143793	80.7283	15.5247	0.575305
N10	susp	0.37453	0.81	0.278262	109.374	21.0335	0.468856
N10	fs	2.3817	0.84	0.310339	115.003	22.1161	39.1312
N10	fs	2.6992	2.35	6.7952	2262.97	435.186	890.712
N10	fs	2.4677	1.61	2.18512	850.072	163.475	301.529
N10	fs	2.5799	1.58	2.06524	809.668	155.705	302.459
N10	fs	2.7398	0.9	0.381704	126.491	24.3252	50.6502
N10	fs	2.7677	2.06	4.5772	1609.11	309.444	651.87
N10	fs	3.0908	1.48	1.6974	683.583	131.458	314.035
N10	fs	2.6902	1.99	4.12627	1471.34	282.951	576.901
N10	fs	3.1458	1.03	0.572151	267.436	51.4299	125.33
N10	fs	2.5863	0.97	0.477874	140.265	26.9741	52.5484
N10	fs	3.0573	0.97	0.477874	140.265	26.9741	63.6479
N10	fs	2.5007	1.39	1.40619	581.098	111.75	209.342
N10	fs	2.8685	2.56	8.78453	2824.34	543.142	1192
N10	fs	2.6345	0.7	0.179594	89.4213	17.1964	34.2245
N10	fs	2.9786	0.97	0.477874	140.265	26.9741	61.7932
N10	fs	0.48914	5.24	75.3343	18044	3470	402.27
N10	fs	0.44743	1.14	0.775735	347.785	66.8817	5.31631
N10	fs	0.50532	1.11	0.71609	324.582	62.4197	8.11853
N10	fs	0.48241	0.84	0.310339	115.003	22.1161	2.43384
N10	fs	0.54043	0.79	0.258155	105.665	20.3202	3.26621
N10	fs	0.59542	0.93	0.42116	132.346	25.4512	5.31368
N10	fs	0.52353	0.79	0.258155	105.665	20.3202	2.96619
N10	fs	0.50046	0.85	0.321555	116.897	22.4802	2.82841
N10	fs	0.51948	2.01	4.25194	1509.94	290.372	41.359
N10	fs	0.51906	1	0.523599	247.733	47.6409	6.76823
N10	fs	0.41976	3.78	28.2796	7746.58	1489.73	82.4034
N10	fs	0.41132	0.89	0.369121	124.556	23.953	1.14833
N10	fs	0.40779	1.67	2.43864	934.537	179.719	8.06163
N10	fs	0.44048	0.93	0.42116	132.346	25.4512	1.86854
N10	fs	0.54685	1.62	2.22609	863.81	166.117	27.633
N10	fs	0.38923	1.34	1.25983	528.516	101.638	2.91111
N10	fs	0.39394	1.72	2.66431	1008.71	193.983	6.35429
N10	fs	0.39088	1.53	1.87531	744.989	143.267	4.30999
N10	fs	0.39904	0.76	0.229847	100.168	19.263	0.716827
N10	fs	0.38839	0.76	0.229847	100.168	19.263	0.537597
N10	fs	0.47471	0.96	0.463247	138.274	26.5911	2.74743
N10	fs	0.4106	0.91	0.394569	128.435	24.699	1.16856
N10	fs	0.42055	0.73	0.203689	94.7526	18.2217	1.0205
N10	fs	0.39029	0.87	0.344791	120.71	23.2134	0.686377
N10	fs	0.38797	0.77	0.23904	101.991	19.6137	0.540186
N10	fs	0.49959	1.04	0.588977	274.21	52.7327	6.59462
N10	fs	0.41694	0.83	0.299387	113.118	21.7535	1.14969
N10	fs	0.40175	1.07	0.641431	295.161	56.7616	2.24663
N10	fs	0.37713	2.15	5.20372	1797.49	345.671	6.24661
N10	fs	0.38142	1.99	4.12627	1471.34	282.951	6.17367
N10	fs	0.37796	1.5	1.76715	707.757	136.107	2.55828
N10	fs	0.46782	1.22	0.950776	414.543	79.7198	7.75688
N10	fs	0.41954	2.06	4.5772	1609.11	309.444	17.0573
N10	fs	0.38852	0.81	0.278262	109.374	21.0335	0.589396
N10	fs	0.48118	1.25	1.02265	441.452	84.8947	9.25129
N10	fs	0.44333	0.87	0.344791	120.71	23.2134	1.76204
N10	fs	0.37867	0.77	0.23904	101.991	19.6137	0.380827
N10	fs	0.3785	0.92	0.40772	130.387	25.0743	0.483128
N10	fs	0.36595	0.93	0.42116	132.346	25.4512	0.211336
N10	fs	0.35058	1.06	0.623615	288.072	55.3984	0
N10	fs	0.38366	0.99	0.508047	241.37	46.4173	1.10361
N10	fs	0.35473	1.13	0.755499	339.941	65.3733	0
N10	fs	0.37084	0.64	0.137258	79.0194	15.196	0.191101
N10	fs	0.35357	1.26	1.04739	450.654	86.6642	0
N10	fs	0.33223	0.78	0.248475	103.824	19.9661	0
N10	fs	0.36807	0.74	0.212175	96.5485	18.567	0.188561
N10	fs	0.32754	0.84	0.310339	115.003	22.1161	0
N10	fs	0.35504	0.96	0.463247	138.274	26.5911	0
N08	susp	0.37841	0.66	0.150533	82.4473	15.8552	0.325583
N08	susp	0.36907	0.6	0.113097	72.286	13.9012	0.164071
N08	susp	0.38692	1.36	1.31709	549.182	105.612	3.00896
N08	susp	0.38459	0.84	0.310339	115.003	22.1161	0.581927
N08	susp	0.37909	0.57	0.0969668	67.3462	12.9512	0.274182
N08	susp	0.38459	1.03	0.572151	267.436	51.4299	1.35325
N08	susp	0.38854	0.99	0.508047	241.37	46.4173	1.39276
N08	susp	0.3923	0.84	0.310339	115.003	22.1161	0.741342
N08	susp	0.37793	1.16	0.817283	363.802	69.962	1.40525
N08	susp	0.39034	1.15	0.796328	355.738	68.4112	2.16782
N08	susp	0.38329	0.67	0.157479	84.1761	16.1877	0.406264
N08	susp	0.39074	0.79	0.258155	105.665	20.3202	0.651507
N08	susp	0.3775	0.83	0.299387	113.118	21.7535	0.428196
N08	susp	0.37578	0.93	0.42116	132.346	25.4512	0.460054
N08	susp	0.3721	0.82	0.288696	111.242	21.3927	0.313092
N08	susp	0.37508	0.8	0.268083	107.515	20.676	0.360207
N08	susp	0.3835	1.28	1.09807	469.408	90.2707	2.28325
N08	susp	0.38534	0.88	0.356818	122.629	23.5824	0.637046
N08	susp	0.37491	0.95	0.448921	136.29	26.2096	0.452445
N08	susp	0.37297	0.68	0.164636	85.9148	16.5221	0.255247
N08	susp	0.37422	1.48	1.6974	683.583	131.458	2.1845
N08	susp	0.37376	1.35	1.28825	538.788	103.613	1.67723
N08	susp	0.3771	0.71	0.187402	91.1889	17.5363	0.338626
N08	susp	0.37907	0.8	0.268083	107.515	20.676	0.437334
N08	susp	0.38571	0.92	0.40772	130.387	25.0743	0.686022
N08	susp	0.38065	0.93	0.42116	132.346	25.4512	0.575933
N08	susp	0.3701	0.9	0.381704	126.491	24.3252	0.310528
N08	susp	0.36498	1.18	0.86029	380.265	73.1279	0.583484
N08	susp	0.38588	1.11	0.71609	324.582	62.4197	1.71769
N08	susp	0.37855	2.36	6.88232	2287.98	439.997	9.0928
N08	susp	0.36829	0.89	0.369121	124.556	23.953	0.265244
N08	susp	0.38646	1.28	1.09807	469.408	90.2707	2.53306
N08	susp	0.37849	1.75	2.80616	1054.89	202.864	4.18094
N08	susp	0.3781	1.6	2.14466	836.47	160.86	3.25659
N08	susp	0.37606	0.92	0.40772	130.387	25.0743	0.459805
N08	susp	0.38586	1.2	0.904779	397.177	76.3802	2.10044
N08	susp	0.3801	0.78	0.248475	103.824	19.9661	0.441544
N08	susp	0.36919	1.03	0.572151	267.436	51.4299	0.612783
N08	susp	0.37191	1.09	0.678076	309.657	59.5494	0.860956
N08	susp	0.38304	1.72	2.66431	1008.71	193.983	4.82306
N08	susp	0.37758	1.29	1.124	478.961	92.108	1.81994
N08	susp	0.36929	1.56	1.9878	783.4	150.654	1.80911
N08	susp	0.36069	0.99	0.508047	241.37	46.4173	0.184194
N08	susp	0.37522	1.91	3.64837	1323.06	254.434	4.46593
N08	susp	0.37836	0.71	0.187402	91.1889	17.5363	0.359284
N08	susp	0.37036	1.6	2.14466	836.47	160.86	2.09258
N08	susp	0.37506	2.17	5.3503	1841.1	354.058	6.1616
N08	susp	0.37505	0.7	0.179594	89.4213	17.1964	0.299105
N08	susp	0.3742	1.99	4.12627	1471.34	282.951	4.69664
N08	susp	0.39196	1.47	1.66322	671.689	129.171	4.28882
N08	susp	0.37915	1.21	0.927587	405.803	78.039	1.6565
N08	susp	0.39932	0.62	0.124788	75.6321	14.5446	0.583001
N08	susp	0.38585	0.98	0.492807	142.265	27.3586	0.7521
N08	susp	0.3816	1.21	0.927587	405.803	78.039	1.83525
N08	susp	0.38788	0.93	0.42116	132.346	25.4512	0.747967
N08	susp	0.38132	2.04	4.44518	1568.98	301.726	7.01673
N08	susp	0.37897	0.64	0.137258	79.0194	15.196	0.320002
N08	susp	0.39277	0.69	0.172007	87.6632	16.8583	0.572507
N08	susp	0.36822	0.62	0.124788	75.6321	14.5446	0.160108
N08	susp	0.37849	0.74	0.212175	96.5485	18.567	0.382657
N08	fs	0.38195	1.99	4.12627	1471.34	282.951	7.3168
N08	fs	0.37976	0.6	0.113097	72.286	13.9012	0.328602
N08	fs	0.42166	0.91	0.394569	128.435	24.699	1.63311
N08	fs	0.38136	2.56	8.78453	2824.34	543.142	13.7202
N08	fs	0.43732	0.74	0.212175	96.5485	18.567	1.52246
N08	fs	0.39839	0.87	0.344791	120.71	23.2134	0.987204
N08	fs	0.38283	0.76	0.229847	100.168	19.263	0.515308
N08	fs	0.38614	2.21	5.65165	1930.26	371.203	11.1759
N08	fs	0.38181	2.23	5.80648	1975.81	379.963	9.7715
N08	fs	0.38648	0.82	0.288696	111.242	21.3927	0.651447
N08	fs	0.3979	1.29	1.124	478.961	92.108	3.87135
N08	fs	0.37259	1.34	1.25983	528.516	101.638	1.66369
N08	fs	0.38647	2.05	4.51087	1588.97	305.57	9.30208
N08	fs	0.37041	1.1	0.69691	317.066	60.9742	0.863307
N08	fs	0.37503	1.43	1.53111	625.387	120.267	2.26616
N08	fs	0.36718	2.18	5.4246	1863.15	358.298	3.8996
N08	fs	0.36506	1.48	1.6974	683.583	131.458	1.14819
N08	fs	0.37934	0.56	0.0919523	65.7211	12.6387	0.293377
N08	fs	0.38185	0.64	0.137258	79.0194	15.196	0.391412
N08	fs	0.38495	0.58	0.10216	68.9821	13.2658	0.383389
N08	fs	0.35977	0.93	0.42116	132.346	25.4512	0.0857889
N08	fs	0.38495	0.88	0.356818	122.629	23.5824	0.681546
N08	fs	0.39113	0.57	0.0969668	67.3462	12.9512	0.455447
N08	fs	0.37822	0.91	0.394569	128.435	24.699	0.545282
N08	fs	0.38113	1.01	0.539464	254.198	48.8842	1.22345
N08	fs	0.3761	1.61	2.18512	850.072	163.475	3.25768
N08	fs	0.38013	1.92	3.70597	1341.07	257.898	6.19305
N08	fs	0.35775	0.61	0.118847	73.9538	14.2219	0.0188106
N08	fs	0.36194	0.77	0.23904	101.991	19.6137	0.109265
N08	fs	0.38151	0.79	0.258155	105.665	20.3202	0.516393
N08	fs	0.37096	1.2	0.904779	397.177	76.3802	1.12403
N08	fs	0.3898	0.58	0.10216	68.9821	13.2658	0.448622
N08	fs	0.35943	1.48	1.6974	683.583	131.458	0.397792
N08	fs	0.37986	0.88	0.356818	122.629	23.5824	0.559844
N08	fs	0.37511	1.6	2.14466	836.47	160.86	3.04409
N08	fs	0.37428	1.23	0.974348	423.397	81.4225	1.47231
N08	fs	0.37225	1.19	0.882347	388.664	74.7432	1.19769
N08	fs	0.35368	0.84	0.310339	115.003	22.1161	0
N08	fs	0.36891	0.92	0.40772	130.387	25.0743	0.316882
N08	fs	0.36886	1.02	0.555647	260.765	50.1471	0.631203
N08	fs	0.42677	0.96	0.463247	138.274	26.5911	1.89599
N08	fs	0.36015	1.99	4.12627	1471.34	282.951	1.06276
N08	fs	0.38779	0.76	0.229847	100.168	19.263	0.612181
N08	fs	0.3719	1.45	1.59626	648.284	124.67	1.95349
N06	susp	0.38832	0.83	0.299387	113.118	21.7535	0.539055
N06	susp	0.37218	0.67	0.157479	84.1761	16.1877	0.198015
N06	susp	0.38703	0.81	0.278262	109.374	21.0335	0.500118
N06	susp	0.37991	0.92	0.40772	130.387	25.0743	0.457405
N06	susp	0.39341	0.69	0.172007	87.6632	16.8583	0.484461
N06	susp	0.44692	0.49	0.0616009	54.6608	10.5117	0.739364
N06	susp	0.37802	1.53	1.87531	744.989	143.267	2.40296
N06	susp	0.36764	0.63	0.130924	77.3207	14.8694	0.129407
N06	susp	0.39652	0.57	0.0969668	67.3462	12.9512	0.403494
N06	susp	0.32031	0.78	0.248475	103.824	19.9661	0
N06	susp	0.3968	2.03	4.38013	1549.14	297.912	9.34629
N06	susp	0.39244	2.88	12.5077	3831.34	736.796	20.6178
N06	susp	0.40481	0.77	0.23904	101.991	19.6137	0.737472
N06	susp	0.38856	1.36	1.31709	549.182	105.612	2.63678
N06	susp	0.38723	0.94	0.434893	134.314	25.8297	0.618174
N06	susp	0.38871	0.9	0.381704	126.491	24.3252	0.610157
N06	susp	0.39003	1.09	0.678076	309.657	59.5494	1.55481
N06	susp	0.38608	0.8	0.268083	107.515	20.676	0.476347
N06	susp	0.36751	1.45	1.59626	648.284	124.67	1.07239
N06	susp	0.37552	0.71	0.187402	91.1889	17.5363	0.260047
N06	susp	0.37645	1.36	1.31709	549.182	105.612	1.64248
N06	susp	0.37459	1.1	0.69691	166.85	32.0866	0.452615
N06	susp	0.38126	0.97	0.477874	140.265	26.9741	0.52037
N06	susp	0.38693	0.72	0.195432	92.9661	17.8781	0.423701
N06	susp	0.38893	0.74	0.212175	96.5485	18.567	0.468897
N06	susp	0.37778	2.01	4.25194	1509.94	290.372	4.81612
N06	susp	0.37991	1.15	0.796328	355.738	68.4112	1.24795
N06	susp	0.37484	0.79	0.258155	105.665	20.3202	0.290587
N06	susp	0.3935	0.73	0.203689	94.7526	18.2217	0.524914
N06	susp	0.38221	0.98	0.492807	142.265	27.3586	0.547994
N06	susp	0.39383	0.67	0.157479	84.1761	16.1877	0.470475
N06	susp	0.37041	0.71	0.187402	91.1889	17.5363	0.190381
N06	susp	0.44235	1.29	1.124	478.961	92.108	6.15138
N06	susp	0.38191	1.05	0.606131	281.088	54.0554	1.07012
N06	susp	0.38819	1.57	2.02627	796.467	153.167	3.78001
N06	susp	0.3897	0.86	0.333038	118.799	22.846	0.590636
N06	susp	0.38517	0.97	0.477874	140.265	26.9741	0.602364
N06	susp	0.32305	0.92	0.40772	130.387	25.0743	0
N06	susp	0.37341	1.71	2.6181	993.598	191.077	2.52004
N06	susp	0.38377	1.56	1.9878	783.4	150.654	3.20031
N06	susp	0.37034	0.95	0.448921	136.29	26.2096	0.283116
N06	susp	0.37887	1.58	2.06524	809.668	155.705	2.71448
N06	susp	0.37305	0.95	0.448921	136.29	26.2096	0.338335
N06	susp	0.36504	0.83	0.299387	113.118	21.7535	0.145349
N06	susp	0.38346	0.91	0.394569	128.435	24.699	0.518724
N06	susp	0.36655	1.05	0.606131	281.088	54.0554	0.424634
N06	susp	0.35834	0.86	0.333038	118.799	22.846	0.0336488
N06	susp	0.37835	1.07	0.641431	295.161	56.7616	0.966603
N06	susp	0.38588	1.04	0.588977	274.21	52.7327	1.20669
N06	susp	0.35263	0.98	0.492807	142.265	27.3586	0
N06	susp	0.36156	1.31	1.1771	498.424	95.8508	0.381119
N06	susp	0.37234	0.95	0.448921	136.29	26.2096	0.323868
N06	susp	0.37011	1.15	0.796328	355.738	68.4112	0.726743
N06	susp	0.3803	0.83	0.299387	113.118	21.7535	0.403422
N06	susp	0.37817	0.87	0.344791	120.71	23.2134	0.392056
N06	susp	0.36266	0.6	0.113097	72.286	13.9012	0.0671612
N06	susp	0.3681	0.84	0.310339	115.003	22.1161	0.200383
N06	susp	0.37543	2.61	9.30937	2969.38	571.035	8.42794
N06	susp	0.37378	2.37	6.97017	2313.17	444.84	5.9948
N06	susp	0.38103	0.59	0.107536	70.6287	13.5824	0.259597
N06	susp	0.38007	0.74	0.212175	96.5485	18.567	0.341008
N06	susp	0.37136	0.69	0.172007	87.6632	16.8583	0.195471
N06	susp	0.35422	0.79	0.258155	105.665	20.3202	0
N06	susp	0.36117	0.87	0.344791	120.71	23.2134	0.0852621
N06	fs	0.36893	1.01	0.539464	254.198	48.8842	0.477554
N06	fs	0.37971	2.43	7.51307	2467.85	474.586	8.63955
N06	fs	0.37885	1.22	0.950776	414.543	79.7198	1.3976
N06	fs	0.39139	0.74	0.212175	96.5485	18.567	0.507695
N06	fs	0.37525	0.84	0.310339	115.003	22.1161	0.325426
N06	fs	0.38789	1.97	4.00311	1433.36	275.647	6.78235
N06	fs	0.37186	2.03	4.38013	1549.14	297.912	3.59335
N06	fs	0.38401	1.7	2.57244	978.624	188.197	4.05924
N06	fs	0.38792	0.83	0.299387	113.118	21.7535	0.535761
N06	fs	0.39181	0.8	0.268083	107.515	20.676	0.572158
N06	fs	0.37814	1.48	1.6974	683.583	131.458	2.23162
N06	fs	0.38816	1.32	1.20426	508.335	97.7566	2.42598
N06	fs	0.39841	0.74	0.212175	96.5485	18.567	0.609686
N06	fs	0.3706	1.55	1.94982	770.464	148.166	1.64107
N06	fs	0.37073	1.65	2.35207	905.836	174.199	1.94713
N06	fs	0.3914	0.99	0.508047	241.37	46.4173	1.2696
N06	fs	0.38008	0.92	0.40772	130.387	25.0743	0.463723
N06	fs	0.3831	1.04	0.588977	274.21	52.7327	1.09985
N06	fs	0.37476	0.95	0.448921	136.29	26.2096	0.375611
N06	fs	0.37814	1.4	1.43676	591.983	113.843	1.93258
N06	fs	0.37183	1.1	0.69691	317.066	60.9742	0.734027
N06	fs	0.37878	0.88	0.356818	122.629	23.5824	0.412142
N06	fs	0.39082	0.77	0.23904	101.991	19.6137	0.527568
N06	fs	0.36191	0.66	0.150533	82.4473	15.8552	0.0677965
N06	fs	0.37126	1.05	0.606131	281.088	54.0554	0.626627
N06	fs	0.39135	0.69	0.172007	87.6632	16.8583	0.460445
N06	fs	0.3667	1.4	1.43676	591.983	113.843	0.913489
N06	fs	0.38305	1.12	0.735619	332.207	63.886	1.32997
N06	fs	0.37318	1.06	0.623615	288.072	55.3984	0.725425
N06	fs	0.36756	1	0.523599	247.733	47.6409	0.414337
N06	fs	0.36907	1.13	0.755499	339.941	65.3733	0.645799
N06	fs	0.37664	0.96	0.463247	138.274	26.5911	0.420196
N06	fs	0.36419	1.13	0.755499	339.941	65.3733	0.396166
N06	fs	0.36819	1.08	0.659584	302.355	58.1453	0.534357
N06	fs	0.38593	1.11	0.71609	324.582	62.4197	1.44012
N06	fs	0.37156	1.43	1.53111	625.387	120.267	1.4224
N06	fs	0.3834	1.3	1.15035	488.633	93.9679	1.98195
N06	fs	0.36037	0.95	0.448921	136.29	26.2096	0.0804878
N06	fs	0.38428	0.89	0.369121	124.556	23.953	0.521707
N06	fs	0.38251	1.01	0.539464	254.198	48.8842	0.997012
N06	fs	0.36922	1.15	0.796328	355.738	68.4112	0.683839
N06	fs	0.3705	1.57	2.02627	796.467	153.167	1.68447
N06	fs	0.3858	1.78	2.95297	1102.35	211.991	4.86939
N06	fs	0.38162	1.17	0.838603	371.978	71.5342	1.40915
N06	fs	0.36884	2.13	5.05985	1754.52	337.408	3.2724
N06	fs	0.37886	1.13	0.755499	339.941	65.3733	1.1466
N06	fs	0.37933	1.04	0.588977	274.21	52.7327	0.944286
N06	fs	0.38275	0.99	0.508047	241.37	46.4173	0.955416
N06	fs	0.39055	1.64	2.30956	891.691	171.479	4.5762
N06	fs	0.37343	1.07	0.641431	295.161	56.7616	0.75438
N06	fs	0.37827	1.31	1.1771	498.424	95.8508	1.6369
N06	fs	0.35621	2.25	5.96412	2022.01	388.849	0
N06	fs	0.39368	1.12	0.735619	332.207	63.886	1.86137
N06	fs	0.39409	1.02	0.555647	260.765	50.1471	1.47717
N06	fs	0.38027	1.27	1.07253	459.972	88.4562	1.64905
N06	fs	0.37397	1.08	0.659584	302.355	58.1453	0.797338
N06	fs	0.37535	1.2	0.904779	397.177	76.3802	1.12987
N06	fs	0.35619	1.14	0.775735	347.785	66.8817	0
N06	fs	0.34859	1.05	0.606131	281.088	54.0554	0
N06	fs	0.3708	1.35	1.28825	538.788	103.613	1.16382
N06	fs	0.37378	1.79	3.00302	1118.46	215.088	2.9175
N06	fs	0.34904	1.01	0.539464	254.198	48.8842	0
N06	fs	0.38998	1.49	1.73204	695.605	133.77	3.51022
N06	fs	0.37596	1.05	0.606131	281.088	54.0554	0.825428
N06	fs	0.36557	1.02	0.555647	260.765	50.1471	0.358046
N06	fs	0.36197	0.9	0.381704	126.491	24.3252	0.105156
N06	fs	0.36844	1.31	1.1771	498.424	95.8508	0.899623
N06	fs	0.38727	1.03	0.572151	267.436	51.4299	1.24049
N06	fs	0.38024	1.43	1.53111	625.387	120.267	2.23926
N06	fs	0.37872	1.4	1.43676	591.983	113.843	1.98425
N06	fs	0.37704	1.71	2.6181	993.598	191.077	3.07922
N06	fs	0.36414	1.8	3.05363	1134.71	218.213	1.31385
N06	fs	0.36124	1.13	0.755499	339.941	65.3733	0.245261
N06	fs	0.35706	1.2	0.904779	397.177	76.3802	0.0367283
N06	fs	0.37084	1.69	2.52731	963.79	185.344	2.08765
N06	fs	0.36631	0.95	0.448921	216.925	41.7164	0.322007
N06	fs	0.36267	1.05	0.606131	281.088	54.0554	0.263286
N06	fs	0.36358	1.82	3.15655	1167.64	224.546	1.25358
N06	fs	0.38346	2.55	8.68199	2795.87	537.666	11.3656
N06	fs	0.43366	1.11	0.71609	324.582	62.4197	3.7714
N06	fs	0.39095	1.11	0.71609	324.582	62.4197	1.68531
N06	fs	0.38294	0.92	0.40772	130.387	25.0743	0.519837
N06	fs	0.36642	1.08	0.659584	302.355	58.1453	0.453825
N06	fs	0.38098	2.13	5.05985	1754.52	337.408	6.47761
N06	fs	0.37869	1.96	3.94246	1414.6	272.039	4.73518
N06	fs	0.36753	2.19	5.4996	1885.36	362.569	3.14477
N06	fs	0.36705	0.98	0.492807	142.265	27.3586	0.227022
N06	fs	0.36374	1.45	1.59626	648.284	124.67	0.711608
N13	susp	0.36287	0.92	0.40772	130.387	25.0743	0.113474
N13	susp	0.38192	1	0.523599	247.733	47.6409	0.854893
N13	susp	0.39056	1.09	0.678076	309.657	59.5494	1.43101
N13	susp	0.37993	1.05	0.606131	281.088	54.0554	0.894224
N13	susp	0.36709	1.15	0.796328	355.738	68.4112	0.512954
N13	susp	0.38875	1.36	1.31709	549.182	105.612	2.40326
N13	susp	0.37588	1.65	2.35207	905.836	174.199	2.38476
N13	susp	0.37902	1.29	1.124	478.961	92.108	1.46467
N13	susp	0.36708	0.86	0.333038	118.799	22.846	0.171141
N13	susp	0.35602	1.01	0.539464	254.198	48.8842	0
N13	susp	0.37783	1.27	1.07253	459.972	88.4562	1.33246
N13	susp	0.38187	0.9	0.381704	126.491	24.3252	0.435647
N13	susp	0.43712	1.01	0.539464	254.198	48.8842	2.77799
N13	susp	0.40487	0.82	0.288696	111.242	21.3927	0.729719
N13	susp	0.3697	1.32	1.20426	508.335	97.7566	0.912716
N13	susp	0.3918	1.22	0.950776	414.543	79.7198	1.98535
N13	susp	0.37021	1.3	1.15035	488.633	93.9679	0.9111
N13	susp	0.37206	1.44	1.56346	636.772	122.456	1.3469
N13	susp	0.38495	1.16	0.817283	363.802	69.962	1.40476
N13	susp	0.33741	0.81	0.278262	109.374	21.0335	0
N13	susp	0.38697	0.94	0.434893	134.314	25.8297	0.555383
N13	susp	0.40914	1.33	1.23184	518.365	99.6856	3.70018
N13	susp	0.38276	0.96	0.463247	138.274	26.5911	0.492898
N13	susp	0.39812	0.7	0.179594	89.4213	17.1964	0.504816
N13	susp	0.38763	1.33	1.23184	518.365	99.6856	2.18976
N13	susp	0.36312	0.77	0.23904	101.991	19.6137	0.0922157
N13	susp	0.38183	1.95	3.88242	1395.99	268.46	4.80036
N13	susp	0.40687	1.38	1.37606	570.336	109.68	3.89578
N13	susp	0.38955	1.17	0.838603	371.978	71.5342	1.66812
N13	susp	0.39427	0.46	0.050965	50.097	9.63403	0.256689
N13	susp	0.37651	0.75	0.220893	98.3536	18.9141	0.267326
N13	susp	0.41876	0.4	0.0335103	41.3094	7.94411	0.348706
N13	susp	0.38364	1.29	1.124	478.961	92.108	1.76443
N13	susp	0.38177	2.01	4.25194	1509.94	290.372	5.1799
N13	susp	0.3737	2.1	4.84905	1691.26	325.242	3.95307
N13	susp	0.3813	1.58	2.06524	809.668	155.705	2.72605
N13	susp	0.36876	1	0.523599	247.733	47.6409	0.41326
N13	susp	0.37701	2.04	4.44518	1568.98	301.726	4.37076
N13	susp	0.36565	1.16	0.817283	363.802	69.962	0.453616
N13	susp	0.37825	1.91	3.64837	1323.06	254.434	3.90794
N13	susp	0.38078	1.33	1.23184	518.365	99.6856	1.70876
N13	susp	0.38502	1.85	3.31523	1218.12	234.255	4.71511
N13	susp	0.3692	0.8	0.268083	107.515	20.676	0.185762
N13	susp	0.37757	3.1	15.5985	4635.74	891.489	13.2656
N13	susp	0.37902	1.44	1.56346	636.772	122.456	1.94726
N13	susp	0.37984	1.08	0.659584	302.355	58.1453	0.958195
N13	susp	0.37925	1.24	0.998306	432.367	83.1475	1.33566
N13	susp	0.36945	1.64	2.30956	891.691	171.479	1.57084
N13	susp	0.36566	0.91	0.394569	128.435	24.699	0.160316
N13	susp	0.38977	2.03	4.38013	1549.14	297.912	6.99321
N13	susp	0.37096	0.78	0.248475	103.824	19.9661	0.204137
N13	susp	0.3807	1.03	0.572151	267.436	51.4299	0.878686
N13	susp	0.37857	1.99	4.12627	1471.34	282.951	4.40971
N13	susp	0.37886	1.01	0.539464	254.198	48.8842	0.771833
N13	susp	0.38127	1	0.523599	247.733	47.6409	0.83308
N13	susp	0.37136	0.66	0.150533	82.4473	15.8552	0.166574
N13	susp	0.37711	1.58	2.06524	809.668	155.705	2.26649
N13	susp	0.38128	0.84	0.310339	115.003	22.1161	0.386891
N13	susp	0.38994	0.84	0.310339	115.003	22.1161	0.521803
N13	susp	0.37236	0.77	0.23904	101.991	19.6137	0.219876
N13	susp	0.38084	1.61	2.18512	850.072	163.475	2.80912
N13	susp	0.40329	0.98	0.492807	142.265	27.3586	0.902772
N13	susp	0.38081	1.71	2.6181	993.598	191.077	3.27937
N13	susp	0.37565	1.1	0.69691	166.85	32.0866	0.434063
N13	susp	0.38192	1.97	4.00311	1433.36	275.647	4.94635
N13	susp	0.37908	1.13	0.755499	339.941	65.3733	1.04231
N13	susp	0.36977	0.98	0.492807	142.265	27.3586	0.256786
N13	susp	0.38973	1.28	1.09807	469.408	90.2707	2.11648
N13	susp	0.39319	1.19	0.882347	388.664	74.7432	1.93459
N13	susp	0.38954	1.73	2.71105	1023.96	196.916	4.59053
N13	susp	0.38864	1.8	3.05363	1134.71	218.213	4.94867
N13	susp	0.39916	1.07	0.641431	295.161	56.7616	1.70787
N13	susp	0.38306	1.19	0.882347	388.664	74.7432	1.40125
N13	susp	0.39169	1.54	1.91232	757.661	145.704	3.61733
N13	susp	0.39581	1.64	2.30956	891.691	171.479	4.7549
N13	susp	0.37422	0.87	0.344791	120.71	23.2134	0.290644
N13	susp	0.38631	1.23	0.974348	423.397	81.4225	1.71287
N13	susp	0.42627	0.97	0.477874	140.265	26.9741	1.32672
N13	susp	0.41106	1.22	0.950776	414.543	79.7198	3.0669
N13	susp	0.39789	1.1	0.69691	317.066	60.9742	1.78008
N13	susp	0.40511	1.13	0.755499	339.941	65.3733	2.24098
N13	susp	0.38372	0.86	0.333038	118.799	22.846	0.438927
N13	susp	0.38594	1.29	1.124	478.961	92.108	1.91366
N13	susp	0.41098	1.43	1.53111	625.387	120.267	4.62
N13	susp	0.38388	0.92	0.40772	130.387	25.0743	0.484565
N13	susp	0.83628	1.17	0.838603	371.978	71.5342	24.1786
N13	susp	0.39028	1.01	0.539464	148.31	28.5211	0.679753
N13	susp	0.40208	0.83	0.299387	113.118	21.7535	0.699276
N13	fs	0.37923	0.78	0.248475	103.824	19.9661	0.360675
N13	fs	0.39265	0.88	0.356818	122.629	23.5824	0.676915
N13	fs	0.39189	1.9	3.59136	1305.2	251	7.05352
N13	fs	0.39112	0.82	0.288696	111.242	21.3927	0.588111
N13	fs	0.38325	2.07	4.64419	1629.41	313.348	6.65915
N13	fs	0.38255	1.16	0.817283	363.802	69.962	1.44797
N13	fs	0.412	0.77	0.23904	101.991	19.6137	0.863897
N13	fs	0.40129	0.97	0.477874	140.265	26.9741	0.959047
N13	fs	0.39842	2.44	7.60621	2494.23	479.659	15.9625
N13	fs	0.39852	0.8	0.268083	107.515	20.676	0.689714
N13	fs	0.39632	0.89	0.369121	124.556	23.953	0.75725
N13	fs	0.40029	1.42	1.49921	614.127	118.101	4.10538
N13	fs	0.38393	0.88	0.356818	122.629	23.5824	0.513878
N13	fs	0.39304	1.21	0.927587	405.803	78.039	2.26418
N13	fs	0.39472	0.81	0.278262	109.374	21.0335	0.63827
N13	fs	0.48863	0.89	0.369121	124.556	23.953	2.51029
N13	fs	0.38692	2.03	4.38013	1549.14	297.912	7.19793
N13	fs	0.39199	1.56	1.9878	783.4	150.654	4.24557
N13	fs	0.35458	0.89	0.369121	124.556	23.953	0
N13	fs	0.3782	0.92	0.40772	130.387	25.0743	0.432476
N13	fs	0.39472	0.81	0.278262	109.374	21.0335	0.63827
N13	fs	0.38555	1.37	1.34636	559.697	107.634	2.48367
N13	fs	0.38857	0.94	0.434893	134.314	25.8297	0.657868
N13	fs	0.38731	2.2	5.57528	1907.73	366.87	8.9775
N13	fs	0.39744	1.19	0.882347	388.664	74.7432	2.4293
N13	fs	0.379	0.92	0.40772	130.387	25.0743	0.44838
N13	fs	0.37267	1.85	3.31523	1218.12	234.255	3.01331
N13	fs	0.36609	0.97	0.477874	140.265	26.9741	0.206258
N13	fs	0.39409	1.26	1.04739	450.654	86.6642	2.58657
N13	fs	0.38864	1.34	1.25983	528.516	101.638	2.5943
N13	fs	0.38124	1.71	2.6181	993.598	191.077	3.75618
N13	fs	0.38153	1.65	2.35207	905.836	174.199	3.46446
N13	fs	0.37793	1.06	0.623615	288.072	55.3984	0.94364
N13	fs	0.44139	0.98	0.492807	142.265	27.3586	1.84252
N13	fs	0.40027	1.02	0.555647	260.765	50.1471	1.74239
N13	fs	0.39659	1.33	1.23184	518.365	99.6856	3.17279
N13	fs	0.39421	1.08	0.659584	302.355	58.1453	1.74093
N13	fs	0.4025	1.01	0.539464	254.198	48.8842	1.78494
N13	fs	0.43499	1.52	1.83878	732.448	140.855	8.77147
N13	fs	0.39924	1.67	2.43864	934.537	179.719	6.09768
N13	fs	0.38447	1.44	1.56346	636.772	122.456	2.72084
N13	fs	0.37479	1.1	0.69691	166.85	32.0866	0.466674
N13	fs	0.42973	1.04	0.588977	274.21	52.7327	3.0639
N13	fs	0.42844	0.94	0.434893	134.314	25.8297	1.47435
N13	fs	0.35206	0.9	0.381704	126.491	24.3252	0
N13	fs	0.3703	1.12	0.735619	332.207	63.886	0.701747
N13	fs	0.45224	1.33	1.23184	518.365	99.6856	7.57105
N13	fs	0.38947	1.48	1.6974	683.583	131.458	3.44197
N13	fs	1.9237	1.18	0.86029	380.265	73.1279	90.8669
N13	fs	0.41048	0.91	0.394569	128.435	24.699	1.05812
N13	fs	0.39947	1.07	0.641431	295.161	56.7616	1.93622
N13	fs	0.37354	0.99	0.508047	241.37	46.4173	0.629101
N13	fs	0.45001	1.54	1.91232	757.661	145.704	10.8085
N13	fs	0.40229	1.01	0.539464	254.198	48.8842	1.7768
N13	fs	0.45766	1.92	3.70597	1341.07	257.898	20.6954
N13	fs	0.40189	1.05	0.606131	281.088	54.0554	1.94762
N13	fs	0.39621	1.64	2.30956	891.691	171.479	5.40617
N13	fs	0.38345	1.54	1.91232	757.661	145.704	3.11954
N13	fs	0.38235	1.21	0.927587	405.803	78.039	1.60277
N13	fs	0.39658	1.06	0.623615	288.072	55.3984	1.76278
N13	fs	0.37563	2.26	6.04399	2045.36	393.339	5.98276
N13	fs	0.38733	1.2	0.904779	397.177	76.3802	1.87027
N13	fs	0.37824	1.41	1.46776	602.993	115.96	2.00373
N13	fs	0.3847	1.19	0.882347	388.664	74.7432	1.67434
N13	fs	0.39019	1.18	0.86029	380.265	73.1279	1.95645
N13	fs	0.3922	1.56	1.9878	783.4	150.654	4.27065
N13	fs	0.35693	1.07	0.641431	295.161	56.7616	0.0218049
N13	fs	0.38634	1.12	0.735619	332.207	63.886	1.51419
N13	fs	0.39062	1.09	0.678076	309.657	59.5494	1.61348
N13	fs	0.38996	1.03	0.572151	267.436	51.4299	1.36657
N13	fs	0.38432	1.3	1.15035	488.633	93.9679	2.07668
N13	fs	0.49381	0.97	0.477874	140.265	26.9741	2.93768
N13	fs	0.3844	1.56	1.9878	270.22	51.9654	1.15173
N13	fs	0.37758	1.36	1.31709	223.609	43.0017	0.720546
N13	fs	0.38191	1.17	0.838603	371.978	71.5342	1.44422
N13	fs	0.41207	1.2	0.904779	397.177	76.3802	3.36845
N13	fs	0.40886	0.93	0.42116	132.346	25.4512	1.05765
N13	fs	0.3906	0.96	0.463247	138.274	26.5911	0.720059
N13	fs	0.38365	1.16	0.817283	363.802	69.962	1.50899
