# Supplementary material
Source: Research Square preprint supplement (doi:10.21203/rs.3.rs-9051103/v1)
Supplement: Supplementary file 5 [file 8f23815be30dcbeb3a4ac6ae.xlsx]

## Sheet: Sheet1
Station	Date local (dd/mm/yyyy)	Latitude (decimal degrees N)	Longitude (decimal degrees E)	MSC deployment depth (m)	Water mass at MSC deployment depth	Temperature at MSC deployment depth (ºC)	Bulk N2 fixation	Single-cell N2 fixation	nifH gene amplicon sequencing
N00	14/07/2023	69.2883	6.19167	30	AW	10.5	Yes	Yes	Yes
N01	15/07/2023	70.9997	10.9998	30	wAW	7	Yes	No	Yes
N04	2023-07-18	73.7245	23.368	30	wAW	6.8	Yes	No	Yes
N12	2023-07-20	75.5007	22.4978	37	wAW	4	Yes	No	Yes
N10	2023-07-22	78.6585	24.65	52	ArW	-1.5	Yes	Yes	Yes
N09	2023-07-23	79.3832	27.7667	66	ArW	-1	No	No	Yes
N08	2023-07-25	79.3407	33.969	56	ArW	-1	Yes	Yes	Yes
N07	2023-07-28	78.5372	30.0495	53	ArW	-1.8	Yes	No	Yes
N06	2023-07-30	76	29.9995	36	wAW	3.5	Yes	Yes	Yes
N05	2023-07-31	74.6098	27.899	22	wAW	7	No	No	Yes
N13	2023-08-01	76.3333	19.9988	35	wAW	6	Yes	Yes	Yes
N15	2023-08-02	77.2218	19.3445	30	ArW	1.2	No	No	Yes
N16	2023-08-03	78.5153	19.2733	28.5	wAW	3.5	Yes	No	Yes
N03	2023-08-06	72.86	19.0707	31	AW	8	No	No	Yes
